# Supplementary material for: β-Arrestin2 Is Critically Involved in the Differential Regulation of Phosphosignaling Pathways by Thyrotropin-Releasing Hormone and Taltirelin
Source: MDPI journal article supplement (doi:10.3390/cells11091473), 2022-04-27
Supplement: s1 [file s1]

## Supplementary Materials

# **$\beta$ -Arrestin2 Is Critically Involved in the Differential Regulation of Phosphosignaling Pathways by Thyrotropin-releasing Hormone and Taltirelin**

Zdenka Drastichova, Radka Trubacova and Jiri Novotny

### **I/ Supplementary Results**

The paragraph numbers in this section correspond to the paragraph numbers in the Results section of the article.

#### *S2. Alterations in Phosphorylation of Phosphoproteins Involved in GTPase-mediated Signal Transduction and Protein Phosphorylation*

When the changes found in the TRH/C pairwise comparison were compared with the Arr-TRH/Arr comparison, 30 and 29 changes in phosphorylation of 22 and 21 phosphoproteins, respectively, were found in the same and opposite directions, respectively. In the pairwise comparison of TAL/C with Arr-TAL/Arr, 36 and 44 changes in phosphorylation of 21 and 35 phosphoproteins, respectively, were detected, going in the same and opposite directions, respectively. Approximately half of these phosphoproteins with changes in the same or opposite direction in pairwise comparisons included other phosphosites found only in pairwise comparisons. Many of the alterations in phosphoproteins detected in both pairwise comparisons were present only in one pairwise comparison. Some altered phosphoproteins were found in only one of four pairwise comparisons (TRH/C, Arr-TRH/Arr, TAL/C, Arr-TAL/Arr), suggesting that TRH and TAL act, at least in part, through different signaling pathways and that  $\beta$ -arrestin2 is an important scaffold protein regulating signaling pathways triggered by TRH or TAL.

#### *S2.1. Alterations in Phosphorylation of Phosphoproteins Involved in Ras GTPase-mediated Signal Transduction Associated with the PI3K/Akt/mTOR Pathway*

The different phosphorylation patterns in Akt1 were found in  $\beta$ -arrestin2-deficient cells treated with TRH or TAL. Ser126 was hypophosphorylated by both ligands, but TRH or TAL also induced hypophosphorylation at Ser124 and Ser122, respectively (Fig. 1, Tables S4 and S5). This could lead to differences in the phosphorylation patterns of downstream Akt effectors. Whereas TRH induced hypophosphorylation at Ser541 in Map3k9 in  $\beta$ -arrestin2-deficient cells, treatment with TAL caused hypophosphorylation at Ser1027 and Ser1031 in Map3k5 (Fig. 1, Tables S9 and S10). In  $\beta$ -arrestin2-deficient cells, the differences were also seen in TSC1/TSC2 and interacting proteins of the mTOR complex. TSC1 was hypophosphorylated by both ligands at Ser561 and Ser565, but TAL induced hyperphosphorylation at Ser1097 in TSC1 and TRH induced hypophosphorylation at Ser1389 in TSC2 (Fig. 1, Table S4 and S5).

While Map4k4 was hyperphosphorylated in  $\beta$ -arrestin2-deficient cells at Ser852 after TAL treatment (Fig. 1, Table S10), Map4k1 was differentially phosphorylated in two clusters of phosphosites with distinct phosphorylation patterns (Fig. 1, Tables S6-S8 and S10). Phosphosites Ser370 and Tyr379 were hypophosphorylated after TRH or TAL treatments in wild-type cells but Ser373 and Ser375 were hypophosphorylated after knockdown of  $\beta$ -arrestin2 and TRH treatment in wild-type cells and hyperphosphorylated in  $\beta$ -arrestin2-deficient cells treated with TAL.

#### *S2.2. Alterations in Phosphorylation of Phosphoproteins Involved in Ras GTPase-mediated Signal Transduction Associated with the Grb2/Sos/Ras/Raf/MEK/ERK Pathway*

In the present study, Ras was not differentially phosphorylated, but several associated proteins were affected. Knockdown of  $\beta$ -arrestin2 resulted in hyperphosphorylation at Ser821, Ser824, Ser2488,

and Thr2432 in neurofibromin (Nf1) and at Ser1114, Ser1179, Ser1180, Ser1189, and Ser1779 in afadin (Afdn) (Fig. 2, Tables S1 and S6). Treatment of  $\beta$ -arrestin2-deficient cells with TAL caused hyperphosphorylation at Ser177 in Rassf5 and hypophosphorylation at Ser719 in Dab2ip (Fig. 2, Table S5). Ras protein mediates signaling to the Adcy6/PKA and MEK/ERK pathways via Raf. As mentioned above, Raf was hypophosphorylated at Ser94 after treatment with TRH and TAL (Fig. 2, Tables S7 and S8). Adenylyl cyclase 6 (Adcy6) was hyperphosphorylated at Ser67 and Thr69 in  $\beta$ -arrestin2-deficient cells and hypophosphorylated at Ser67 and Thr69 after treatment of wild-type and  $\beta$ -arrestin2-deficient cells with TAL, respectively (Fig. 2, Tables S1, S3, and S5). Protein kinase A (PKA), a downstream protein of Adcy6, was differentially phosphorylated in three regulatory subunits. Whereas the Prkar1a and Prkar2a subunits were hyperphosphorylated at Ser83 and Ser97, respectively, in  $\beta$ -arrestin2-deficient cells, the Prkar2b subunit was hypophosphorylated at Ser83 and Ser85 in TAL-treated cells (Fig. 2, Tables S6 and S8). TRH treatment had no effect on phosphorylation of the Adcy6/PKA pathway in wild-type or  $\beta$ -arrestin2-deficient cells, highlighting the difference between TRH- and TAL-triggered pathways.

MEK1/2 function is influenced by Map3k2 and Map3k9 kinases [1,2]. Map3k2 kinase (MEKK2) was hyperphosphorylated in  $\beta$ -arrestin2-deficient cells at Ser163, Ser239, Ser331, Ser334, and Ser337 (Fig. 2, Table S6). Both TRH and TAL treatment of these cells resulted in hyperphosphorylation at Ser135 (Fig. 2, Tables S9 and S10), and TAL treatment resulted in hypophosphorylation at Ser337 (Fig. 2, Table S9). These phosphosites are located in disordered regions between the paxilin-binding domain and the kinase domain [3]. Map3k9 kinase was hyperphosphorylated in  $\beta$ -arrestin2-deficient cells at Ser541 and Ser545 and hypophosphorylated at Ser541 in  $\beta$ -arrestin2-deficient cells treated with TRH (Fig. 2, Tables S6 and S9). Both these phosphosites are located in disordered regions [4].

The kinase Rps6ka3 was hyperphosphorylated at Thr365 and Ser369 after TRH treatment in  $\beta$ -arrestin2-deficient cells (Fig. 2, Table S4). Both phosphosites are located in the linker region and are phosphorylated by activated ERK [5], suggesting that at least simultaneous  $\beta$ -arrestin2 knockdown and TRH treatment triggers ERK activation, which could be mediated by phosphorylation of Map3k2 (MEKK2) under these conditions. The Riok2 factor for pre-40S particle assembly is a substrate of Rps6ka3 [6]. In our study, it was found to be hyperphosphorylated at Ser437 after treatment with TAL of  $\beta$ -arrestin2-deficient cells (Fig. 2, Table S10). It is not known whether this phosphosite is phosphorylated by Rps6ka3.

Another ERK substrate, Cdk4, was hyperphosphorylated in  $\beta$ -arrestin2-deficient cells or TRH-treated cells at Ser300 (Fig. 2, Tables S6 and S7). The transcription factor Rreb1 was hyperphosphorylated in  $\beta$ -arrestin2-deficient cells at Ser1177, Ser1178, and Ser1306 (Fig. 2, Table S1) and hyperphosphorylated in  $\beta$ -arrestin2-deficient cells or TRH-treated cells at Ser1137, Ser1138, and Ser1590 (Fig. 2, Tables S1 and S2), hypophosphorylated at Ser1603 in TRH- or TAL-treated cells (Fig. 2, Tables S2 and S3), hyperphosphorylated at Thr1595 and Ser1597 in  $\beta$ -arrestin2-deficient cell treated with TRH (Fig. 2, Table S4). Phosphosites Ser1361 and Ser1364 were hypophosphorylated in  $\beta$ -arrestin2-deficient cells and hyperphosphorylated in  $\beta$ -arrestin2-deficient cells after TAL treatment (Fig. 2, Tables S1 and S5).

While knockdown of  $\beta$ -arrestin2 resulted in hyperphosphorylation of six phosphosites in Dcl1, treatments with TRH and TAL in wild-type or  $\beta$ -arrestin2-deficient cells caused hypophosphorylation with one exception, hyperphosphorylation at Ser340 in  $\beta$ -arrestin2-deficient cells after treatment with TAL. Three phosphosites (Ser330, Ser363, and Ser364) were differentially phosphorylated only after treatment of wild-type cells with TRH or TAL, and the phosphorylation patterns after treatments with TRH or TAL were markedly influenced by  $\beta$ -arrestin2 downregulation.

### *S2.3. Alterations in Phosphorylation of Phosphoproteins Involved in Rho GTPase-mediated Signal Transduction*

Arhgef2 was hyperphosphorylated at Ser925, Ser937, Ser940, and Ser944 in  $\beta$ -arrestin2-deficient cells, and hypophosphorylated at Ser925, Ser937, and Ser940 after TAL treatment (Fig 3, Tables S1 and S3). All phosphosites with unknown function are located in the C-terminal region [7]. The protein Arhgef11 was differentially phosphorylated in three areas (Fig. 3), located in disordered regions outside domains [8]. Phosphosites in the first area (Ser270, Ser273, and Thr311) were hyperphosphorylated after treatment of  $\beta$ -arrestin2-deficient cells with TRH or TAL and hypophosphorylated in wild-type cells (Ser308) treated with TRH or TAL (Fig. 3, Tables S2-S5). Phosphosites in the second area (Ser720, Thr725, Thr729) and third area (Ser1511, Ser1512, Thr1515, and Thr1516) were hyperphosphorylated in  $\beta$ -

arrestin2-deficient cells (Fig. 3, Table S1). Protein Arhgef28 was differentially phosphorylated in two areas. Phosphosites Ser312 and Ser314 in the first area were hyperphosphorylated in  $\beta$ -arrestin2-deficient cells, and Ser314 was hypophosphorylated after treatment with TRH or TAL (Fig. 3, Tables S1-S3). Phosphosites Thr1197, Ser1198, and Ser1200 were hypophosphorylated in wild-type and  $\beta$ -arrestin2-deficient cells treated with TRH or TAL (Fig. 3, Tables S2-S5). The phosphorylation patterns of Arhgef12 and Arhgef40 were affected only by TAL treatment (Fig. 3, Table S1, S3, and S5). The phosphosites in Arhgef12, Arhgef28, and Arhgef40 were determined to be located in disordered regions by comparison with the amino acid sequence and the position of the functional domains according to the protein IDs in the UniProt database. Their functions are not known.

Dishevelled proteins (Dvl1, Dvl2, and Dvl3), Camk2 $\beta$ , and Vav2 were markedly phosphorylated by TRH or TAL treatments of wild-type cells (Fig. 3, Tables S2 and S3). Intersectin-1 (Itsn1) appears to be a key protein, as it was differentially phosphorylated in all five paired experimental groups (Fig. 3, Tables S1-S5).

Some of the Rho downstream effectors (e.g. Rock1, Snrk, Pak6, PKC $\delta$ , PKD2) were differentially phosphorylated only in  $\beta$ -arrestin2-deficient cells (Fig. 3, Tables S1 and S6). Only one phosphosite was found in the functional domain, phosphosite Ser711 in PKD2 in the protein kinase domain [9]. Map3k5 (ASK1) was affected with or without TAL in  $\beta$ -arrestin2-deficient cells (Fig. 3, Tables S6 and S10). Map3k20 (Zak) was hypophosphorylated at Ser434 and Ser452 after treatment with TRH or TAL (Fig. 3, Tables S7 and S8). Both kinases were affected with the same phosphorylation pattern at their altered phosphosites. Treatment with TAL decreased the level of phosphorylation at Ser439 in Map3k7, but  $\beta$ -arrestin2 knockdown induced hyperphosphorylation at its phosphosites Ser439 and Ser454 (Fig. 3, Tables S6, S8-10). In addition to PKC $\delta$  and PKD2, other protein kinases were also differentially phosphorylated, and not only in  $\beta$ -arrestin2-deficient cells.

In protein kinase D1, the first cluster (Ser161 and Ser164) was hyperphosphorylated in  $\beta$ -arrestin2-deficient cells and hypophosphorylated after treatment with TAL (Fig. 3, Tables S6 and S8). The second cluster (Ser189 and Ser192) was identically hypophosphorylated in wild-type cells treated with TRH or TAL (Fig. 3, Tables S7 and S8), whereas phosphosites in the third cluster (Ser361 and Thr364) were identically hypophosphorylated or hyperphosphorylated only after TRH treatment or after TRH or TAL treatments of  $\beta$ -arrestin2-deficient cells, respectively (Fig. 3, Tables S6-S10).

#### *S2.4. Alterations in Phosphorylation of Phosphoproteins Involved in Rac GTPase-mediated Signal Transduction*

In contrast to TAL treatment, TRH treatment induced changes in the phosphorylation patterns of Dvl3 and Marcks (Fig. 4, Table S2). In  $\beta$ -arrestin2-deficient cells, treatment with TRH or TAL affected the phosphorylation of other GEFs such as Tiam1, Mcf2l, Prex2, and Dock6 (Fig. 4, Tables S4 and S5).

The GAPs Myo9b and Arhgap35 affected both Rho and Rac GTPases [10]. Three other GAPs, Arhgap17, Arhgap35, and Farp2, were hypophosphorylated after treatment with TRH or TAL (Fig. 4, Tables S2 and S3), but both ligands induced hypophosphorylation of Farp2 and Arhgap35 in  $\beta$ -arrestin2-deficient cells (Fig. 4, Tables S4 and S5). In contrast to TRH, treatment of  $\beta$ -arrestin2-deficient cells with TAL did not affect the phosphorylation state of Arhgap 17 (Fig. 4, Tables S4 and S5).

Srpkl kinase was significantly affected in three phosphorylation clusters. The first cluster, comprising Ser33, Ser37, Ser39, and Ser51, was hypophosphorylated after TRH treatment. Phosphosite Ser51 was also hypophosphorylated in TAL-treated cells and after treatment of  $\beta$ -arrestin2-deficient cells with TRH or TAL (Fig. 4, Tables S2-S5). The second cluster, involving Ser309 and Ser311, was hyperphosphorylated after  $\beta$ -arrestin knockdown or after treatment of  $\beta$ -arrestin2-deficient cells with TAL (Fig. 4, Tables S1 and S5). The third cluster, involving Thr453 and Ser455, was hypophosphorylated after treatment of wild-type cells with TRH or TAL (Fig. 4, Tables S2-S3). In contrast, Srpkl was differentially phosphorylated only in  $\beta$ -arrestin2-deficient cells before and after treatment with TRH or TAL (Fig. 4, Tables S1, S4, and S5).

#### *S2.5. Alterations in Phosphorylation of Phosphoproteins Involved in Cdc42 GTPase-mediated Signal Transduction*

The altered Pak kinases and Map3k7 are downstream effectors that are also typical for other members of the Rho class (Figs. 3-5). Both Cdc42bpa and Cdc42bpb were differentially phosphorylated at their C-termini outside the functional domains (protein IDs A0A0G2K5Z1 and Q7TT49; UniProt database). Both were hyperphosphorylated in  $\beta$ -arrestin2-deficient cells (Fig. 5, Table S1), whereas

Cdc42bpa or Cdc42bpb were hypophosphorylated in  $\beta$ -arrestin2-deficient cells treated with TAL or in wild-type cells treated with TRH or TAL (Fig. 5, Tables S3 and S5). Phosphosite Ser116 in Cdc42ep4 was hyperphosphorylated in  $\beta$ -arrestin2-deficient cells after treatment with TRH or TAL (Fig. 5, Tables S4-S5).

#### *S2.6. Alterations in Phosphorylation of Phosphoproteins Involved in Arf GTPase-mediated Signal Transduction*

Arfgef1 was hypophosphorylated in the first and second clusters after treatment with TAL and only at Ser394 in the second cluster after treatment with TRH. The different phosphorylation patterns were found after TRH or TAL treatment of  $\beta$ -arrestin2-deficient cells (Fig. 6, Tables S1-S5). Arfgef2 was hyperphosphorylated in  $\beta$ -arrestin2-deficient cells in all three clusters and hypophosphorylated in the first cluster after treatment with TRH or TAL (Fig. 6, Tables S1-S3). Arfgef3 was hypophosphorylated in  $\beta$ -arrestin2-deficient cells treated with TRH or TAL (Fig. 6, Tables S4-S5).

Four Arf GAPs (Arfgap2, Asap1, Asap2, and Agfg1) were hypophosphorylated in wild-type cells after treatment with TAL (Fig. 6, Table S3) and only Agfg1 was hypophosphorylated in wild-type cells after treatment with TRH (Fig. 6, Table S2). Two proteins (Asap1 and Arap1) were hyperphosphorylated in  $\beta$ -arrestin2-deficient cells after treatment with TRH or TAL (Fig. 6, Tables S4 and S5). These data suggest that  $\beta$ -arrestin knockdown abolished the TRH/TAL effect on hypophosphorylation of Arf-GAPs, which could lead to a change in their GAP activities.

Arfip1 (arfaptin-1), an interacting protein for Arf [11], was hypophosphorylated at the N-terminus in wild-type cells after treatment with TRH or TAL and in  $\beta$ -arrestin2-deficient cells treated with TRH (Fig. 6, Tables S2-S4). Bin1, which forms a complex with Arf6 and the GluA1 receptor [12], was hyperphosphorylated after  $\beta$ -arrestin2 knockdown and hypophosphorylated in wild-type cells after treatment with TRH and TAL and in  $\beta$ -arrestin2-deficient cells after treatment with TRH (Fig. 6, Tables S1-S4).

#### *S2.7. Alterations in Phosphorylation of Phosphoproteins Involved in Rab GTPase-mediated Signal Transduction*

Phosphosites in the first cluster were hyperphosphorylated after knockdown of  $\beta$ -arrestin2 and hypophosphorylated in wild-type cells after treatment with TAL (Fig. 7, Tables S1 and S5). The second cluster (Thr972, Ser973, Ser978) was hypophosphorylated after treatment with TAL, and the hypophosphorylation was more pronounced in  $\beta$ -arrestin2-deficient cells than in wild-type cells (Fig. 7, Tables S3 and S5). In the case of PDZD8,  $\beta$ -arrestin2 deficiency deepened the TAL effect on hypophosphorylation.

The Rab8-GEF, Rab3ip, was hypophosphorylated at Ser272 in wild-type cells after treatment with TRH or TAL (Fig. 7, Tables S2 and S3). Dennd4c, which has GEF activity toward Rab10 [13], was hypophosphorylated after  $\beta$ -arrestin2 knockdown and TRH or TAL treatments of wild-type cells but hyperphosphorylated in  $\beta$ -arrestin2-deficient cells treated with TAL (Fig. 7, Tables S1-S3 and S5), suggesting that  $\beta$ -arrestin2 knockdown reverses the TAL effect on Dennd4c phosphorylation. Dennd5a was hyperphosphorylated after  $\beta$ -arrestin2 knockdown at Thr1079 and Ser1085 but hypophosphorylated in  $\beta$ -arrestin2-deficient cells after treatment with TAL (Fig. 7, Tables S1 and S5). Tbc1d4 and Tbc1d25, which interact with several Rab proteins associated with the Golgi, were hyperphosphorylated in  $\beta$ -arrestin2-deficient cells (Fig. 7, Table S1).

Madd possesses a DENN domain, which is also found in Dennd proteins, and GEF activity for both Rab3 and Rab27 [13]. In our study, this protein was differentially phosphorylated at two phosphosites, Ser828 and Ser1196, both located in disordered regions (protein ID O08873; UniProt Database). Both phosphosites exhibit very different phosphorylation patterns. Whereas Ser828 was hypophosphorylated after TRH or TAL treatments in wild-type cells, Ser1196 was hypophosphorylated after  $\beta$ -arrestin2 knockdown and hyperphosphorylated after TRH and TAL treatments of  $\beta$ -arrestin2-deficient cells (Fig. 7, Tables S1-S5).

#### *S2.8. Alterations in Phosphorylation of Phosphoproteins Involved in Ral GTPase-mediated Signal Transduction*

RalGAP, which inactivates Ral GTPases, is a heterodimeric complex consisting of an  $\alpha$  (RalGAPa1 or RalGAPa2) catalytic subunit and a  $\beta$  regulatory subunit (RalGAPb) [14]. The RalGAPa1 and RalGAPb subunits were found to be hyperphosphorylated after  $\beta$ -arrestin2 knockdown, RalGAPa2 was hypophosphorylated after treatment with TAL and RalGAPb was hypophosphorylated in  $\beta$ -arrestin2-deficient cells after treatment with TRH (Fig. 8, Tables S1, S3, and S4).



## S2.9. Alterations in Phosphorylation of Phosphoproteins Involved in Ran GTPase-mediated Signal Transduction

Only Ranbp10 was affected by TRH and TAL treatments in wild-type cells. The opposite effect on phosphorylation was observed after TRH treatment of  $\beta$ -arrestin2-deficient cells (Fig. 9, Tables S2-S4). Ranbp1, Ranbp3, and Ranbp9 were differentially phosphorylated after  $\beta$ -arrestin2 knockdown and after treatment of  $\beta$ -arrestin2-deficient cells with TRH or TAL (Fig. 9, Tables S1, S4, and S5).

Vrk3 has been shown to interact with Ran GTPases [15]. It was differentially phosphorylated after  $\beta$ -arrestin2 knockdown, in wild-type cells treated with TAL, and in  $\beta$ -arrestin2-deficient cells treated with TRH or TAL (Fig. 9, Tables S6 and S8-S10). Phosphosites Ser82, Ser83, and Ser85 form the first phosphorylation cluster and Ser88 the second (Fig. 9).

## S2.10. Alterations in Phosphorylation of Phosphoproteins Involved in Rap GTPase-mediated Signal Transduction

Rapgef6 was mainly affected in  $\beta$ -arrestin2-deficient cells after treatment with TAL. Other phosphorylation patterns were also found after  $\beta$ -arrestin2 knockdown and in wild-type or  $\beta$ -arrestin2-deficient cells treated with TRH (Fig. 10, Tables S1, S2, S3, and S5).

Rap1gap2, which has GTPase-stimulating activity toward Rap1 [16], was hypophosphorylated after knockdown of  $\beta$ -arrestin2 at Ser361, as it was in wild-type cells treated with TRH. On the other hand, treatment of  $\beta$ -arrestin2-deficient cells with TRH or TAL induced hyperphosphorylation of this phosphosite (Fig. 10, Tables S1, S2, S4, and S5). The phosphosite Ser365 was hypophosphorylated after treatment of wild-type cells with TRH (Fig. 10, Tables S2), suggesting that only Ser361 is affected by  $\beta$ -arrestin2 knockdown.

The protein Sip1l1 with RapGAP activity was affected by treatment of wild-type cells with TRH, but  $\beta$ -arrestin2 knockdown resulted in effects of both ligands on its phosphorylation state (Fig. 10, Tables S1, S2, S4, and S5). Radil protein, which interacts with Rap GTPase [17], was hypophosphorylated after treatment of wild-type cells with TRH or TAL (Fig. 10, Tables S2 and S3). Tnik, a downstream effector of Rap2 [18], was hypophosphorylated in wild-type cells after treatment with TAL (Fig. 10, Table S3).

## References

1. Bok, S.; Shin, D.Y.; Yallowitz, A.R.; Eiseman, M.; Cung, M.; Xu, R.; Li, N.; Sun, J.; Williams, A.L.; Scott, J.E.; et al. MEKK2 mediates aberrant ERK activation in neurofibromatosis type I. *Nat. Commun.* **2020**, *11*, doi:10.1038/s41467-020-19555-6.
2. Fawdar, S.; Trotter, E.W.; Li, Y.Y.; Stephenson, N.L.; Hanke, F.; Marusiak, A.A.; Edwards, Z.C.; Ientile, S.; Waszkowycz, B.; Miller, C.J.; et al. Targeted genetic dependency screen facilitates identification of actionable mutations in FGFR4, MAP3K9, and PAK5 in lung cancer. *Proc. Natl Acad. Sci. U. S. A.* **2013**, *110*, 12426-12431, doi:10.1073/pnas.1305207110.
3. Kahle, M.P.; Cuevas, B.D. Interaction with the Paxillin LD1 Motif Relieves MEKK2 Auto-inhibition. *J. Mol. Signal.* **2015**, *10*, 4, doi:10.5334/1750-2187-10-4.
4. Stark, M.S.; Woods, S.L.; Gartside, M.G.; Bonazzi, V.F.; Dutton-Regester, K.; Aoude, L.G.; Chow, D.; Sereduk, C.; Niemi, N.M.; Tang, N.Y.; et al. Frequent somatic mutations in MAP3K5 and MAP3K9 in metastatic melanoma identified by exome sequencing. *Nat. Gen.* **2012**, *44*, 165-169, doi:10.1038/ng.1041.
5. Vaidyanathan, H.; Opoku-Ansah, J.; Pastorino, S.; Renganathan, H.; Matter, M.L.; Ramos, J.W. ERK MAP kinase is targeted to RSK2 by the phosphoprotein PEA-15. *Proc. Natl. Acad. Sci. U. S. A.* **2007**, *104*, 19837-19842, doi:10.1073/pnas.0704514104.
6. Cerezo, E.L.; Houles, T.; Lie, O.; Sarthou, M.K.; Audouy, C.; Lavoie, G.; Halladjian, M.; Cantaloube, S.; Froment, C.; Burlet-Schiltz, O.; et al. RIOK2 phosphorylation by RSK promotes synthesis of the human small ribosomal subunit. *Plos Gen.* **2021**, *17*, doi:10.1371/journal.pgen.1009583.
7. Ravindran, E.; Hu, H.; Yuzwa, S.A.; Hernandez-Miranda, L.R.; Kraemer, N.; Ninnemann, O.; Musante, L.; Boltshauser, E.; Schindler, D.; Hubner, A.; et al. Homozygous ARHGEF2 mutation causes intellectual disability and midbrain-hindbrain malformation. *Plos Gen.* **2017**, *13*, doi:10.1371/journal.pgen.1006746.

8. Lee, S.; Cieply, B.; Yang, Y.Q.; Peart, N.; Glaser, C.; Chan, P.; Carstens, R.P. Esrp1-Regulated Splicing of Arhgef11 Isoforms Is Required for Epithelial Tight Junction Integrity. *Cell Rep.* **2018**, *25*, 2417-+, doi:10.1016/j.celrep.2018.10.097.
9. Rykx, A.; De Kimpe, L.; Mikhalap, S.; Vantus, T.; Seufferlein, T.; Vandenheede, J.R.; Van Lint, J. Protein kinase D: a family affair. *FEBS Lett.* **2003**, *546*, 81-86, doi:10.1016/s0014-5793(03)00487-3.
10. Muller, P.M.; Rademacher, J.; Bagshaw, R.D.; Wortmann, C.; Barth, C.; van Unen, J.; Alp, K.M.; Giudice, G.; Eccles, R.L.; Heinrich, L.E.; et al. Systems analysis of RhoGEF and RhoGAP regulatory proteins reveals spatially organized RAC1 signalling from integrin adhesions. *Nat. Cell Biol.* **2020**, *22*, doi:10.1038/s41556-020-0488-x.
11. Sztul, E.; Chen, P.W.; Casanova, J.E.; Cherfils, J.; Decks, J.B.; Lambright, D.G.; Lee, F.J.S.; Randazzo, P.A.; Santy, L.C.; Schurmann, A.; et al. ARF GTPases and their GEFs and GAPs: concepts and challenges. *Mol. Biol. Cell* **2019**, *30*, 1249-1271, doi:10.1091/mbc.E18-12-0820.
12. Schürmann, B.; Bermingham, D.P.; Kopeikina, K.J.; Myczek, K.; Yoon, S.; Horan, K.E.; Kelly, C.J.; Martin-de-Saavedra, M.D.; Forrest, M.P.; Fawcett-Patel, J.M.; et al. A novel role for the late-onset Alzheimer's disease (LOAD)-associated protein Bin1 in regulating postsynaptic trafficking and glutamatergic signaling. *Mol. Psychiatry* **2020**, *25*, 2000-2016, doi:10.1038/s41380-019-0407-3.
13. Marat, A.L.; Dokainish, H.; McPherson, P.S. DENN Domain Proteins: Regulators of Rab GTPases. *Journal of Biological Chemistry* **2011**, *286*, 13791-13800, doi:10.1074/jbc.R110.217067.
14. Personnic, N.; Lakisic, G.; Gouin, E.; Rousseau, A.; Gautreau, A.; Cossart, P.; Bierne, H. A role for Ral GTPase-activating protein subunit beta in mitotic regulation. *FEBS J.* **2014**, *281*, 2977-2989, doi:10.1111/febs.12836.
15. Sanz-Garcia, M.; Lopez-Sanchez, I.; Lazo, P.A. Proteomics Identification of Nuclear Ran GTPase as an Inhibitor of Human VRK1 and VRK2 (Vaccinia-related Kinase) Activities. *Mol. Cell. Prot.* **2008**, *7*, 2199-2214, doi:10.1074/mcp.M700586-MCP200.
16. Schultess, J.; Danielewski, O.; Smolenski, A.P. Rap1GAP2 is a new GTPase-activating protein of Rap1 expressed in human platelets. *Blood* **2005**, *105*, 3185-3192, doi:10.1182/blood-2004-09-3605.
17. Smolen, G.A.; Schott, B.J.; Stewart, R.A.; Diederichs, S.; Muir, B.; Provencher, H.L.; Look, A.T.; Sgroi, D.C.; Peterson, R.T.; Haber, D.A. A Rap GTPase interactor, RADIL, mediates migration of neural crest precursors. *Genes Dev.* **2007**, *21*, 2131-2136, doi:10.1101/gad.1561507.
18. Chen, X.; Shibata, A.C.E.; Hendi, A.; Kurashina, M.; Fortes, E.; Weiling, N.L.; MacVicar, B.A.; Murakoshi, H.; Mizumoto, K. Rap2 and TNIK control Plexin-dependent tiled synaptic innervation in *C. elegans*. *Elife* **2018**, *7*, doi:10.7554/eLife.38801.

## II/ Supplementary Figures and Tables

**Figure S1.** Downregulation of  $\beta$ -arrestin2 was performed using siRNA gene silencing technology. To suppress the expression of  $\beta$ -arrestin2 ( $\beta$ -Arr2), GH1 cells were transfected with the appropriate siRNA as described in Materials and Methods. Two days after transfection, total cell lysates (20  $\mu$ g per lane) were subjected to SDS-PAGE and immunoblotted with  $\beta$ -Arr2 (A) or  $\beta$ -Arr1 (B) antibody. Transfection of GH1 cells with nonsilencing (CTRL) or specific siRNA is indicated at the top of each immunoblot (middle panel of the figure). Signal intensities were normalized to total protein by staining membranes with Ponceau S (middle panel of the figure). Transfection of GH1 cells with  $\beta$ -arrestin2 resulted in a decrease of more than 60% in the expression of  $\beta$ -arrestin2 and, in parallel, there was no significant change in  $\beta$ -arrestin1 (lower panel of the figure). Values represent the mean  $\pm$  S.E.M. (\*\*,  $p < 0.01$  compared with CTRL) of three independent experiments.

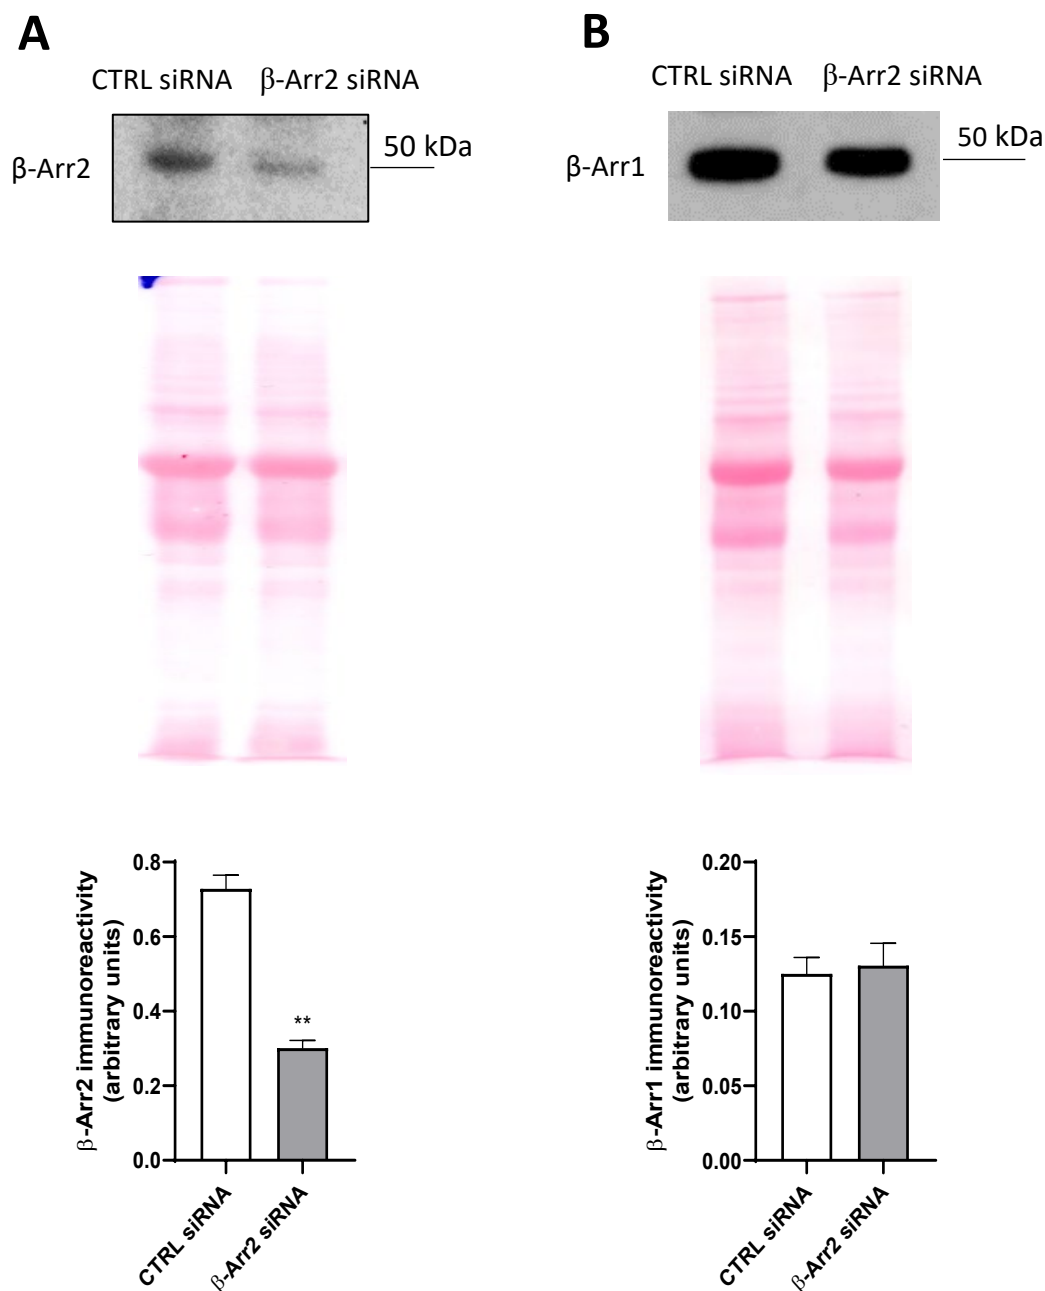

**Table S1.** A list of differentially phosphorylated proteins involved in the regulation of small GTPase activity in GH1 cells after siRNA-mediated  $\beta$ -arrestin2 knockdown

| Uniprot ID | Gene ID  | Gene name                                                    | Phosphorylated regions                                                                                                                                                                                                                                 |
|------------|----------|--------------------------------------------------------------|--------------------------------------------------------------------------------------------------------------------------------------------------------------------------------------------------------------------------------------------------------|
| F1LRI7     | Aak1     | AP2 associated kinase 1                                      | Thr608 $\uparrow$ [12.88] ( $\_1$ )                                                                                                                                                                                                                    |
| F1M0N1     | Abl2     | ABL proto-oncogene 2, non-receptor tyrosine kinase           | Ser629 $\uparrow$ [70.75] ( $\_1$ )                                                                                                                                                                                                                    |
| A0A0G2K429 | Adcy6    | adenylate cyclase 6                                          | Ser67 $\uparrow$ [37.83] ( $\_1$ ), Thr69 $\uparrow$ [AR] ( $\_1$ )                                                                                                                                                                                    |
| O35889     | Afdn     | afadin, adherens junction formation factor                   | Ser1114 $\uparrow$ [15.02] ( $\_1$ ), Ser1179 $\uparrow$ [33.60] ( $\_3$ ), Ser1180 $\uparrow$ [33.60] ( $\_3$ ), Ser1189 $\uparrow$ [33.60] ( $\_3$ ), Ser1779 $\uparrow$ [4.40] ( $\_1$ )                                                            |
| F1M9N7     | Agfg1    | ArfGAP with FG repeats 1                                     | Thr177 $\uparrow$ [65.90] ( $\_2$ ), Thr179 $\uparrow$ [AR] ( $\_2$ ), Ser181 $\uparrow$ [84.71] ( $\_2$ )                                                                                                                                             |
| P47196     | Akt1     | AKT serine/threonine kinase 1                                | Ser124 $\uparrow$ [169.68] ( $\_2$ ), Ser 124 $\uparrow$ [93.14] ( $\_1$ ), Ser126 $\uparrow$ [AR] ( $\_2$ ), Ser126 $\uparrow$ [155.76] ( $\_3$ ), Ser129 $\uparrow$ [155.76] ( $\_3$ )                                                               |
| P0C5Y8     | Als2     | alsin Rho guanine nucleotide exchange factor                 | Ser477 $\uparrow$ [9.23] ( $\_2$ ), Ser486 $\uparrow$ [9.67] ( $\_2$ )                                                                                                                                                                                 |
| Q3MID3     | Arfgap2  | ADP-ribosylation factor GTPase activating protein 2          | Ser431 $\uparrow$ [AR] ( $\_1$ )                                                                                                                                                                                                                       |
| Q4KLN7     | Arfgap3  | ADP-ribosylation factor GTPase activating protein 3          | Ser332 $\uparrow$ [17.40] ( $\_1$ )                                                                                                                                                                                                                    |
| D4A631     | Arfgef1  | ADP ribosylation factor guanine nucleotide exchange factor 1 | Ser393 $\downarrow$ [C] ( $\_2$ ), Ser394 $\downarrow$ [C] ( $\_2$ ), Ser1563 $\uparrow$ [AR] ( $\_2$ ), Ser1566 $\uparrow$ [AR] ( $\_2$ )                                                                                                             |
| Q7TSU1     | Arfgef2  | ADP ribosylation factor guanine nucleotide exchange factor 2 | Ser218 $\uparrow$ [32.01] ( $\_2$ ), Ser355 $\uparrow$ [AR] ( $\_2$ ), Ser356 $\uparrow$ [AR] ( $\_2$ ), Ser1518 $\uparrow$ [AR] ( $\_2$ ), Ser1520 $\uparrow$ [AR] ( $\_2$ ), Ser1521 $\uparrow$ [AR] ( $\_2$ )                                       |
| A0A0G2JYA2 | Arfp1    | ADP-ribosylation factor interacting protein 1                | Ser9 $\uparrow$ [AR] ( $\_1$ )                                                                                                                                                                                                                         |
| D4A6C5     | Arhgap1  | Rho GTPase activating protein 1                              | Ser51 $\uparrow$ [AR] ( $\_2$ )                                                                                                                                                                                                                        |
| Q6TUE6     | Arhgap5  | Rho GTPase activating protein 5                              | Thr1171 $\uparrow$ [AR] ( $\_2$ ), Ser1173 $\uparrow$ [5.30] ( $\_2$ ), Ser1176 $\uparrow$ [5.30] ( $\_2$ ), Thr1217 $\uparrow$ [191.85] ( $\_1$ )                                                                                                     |
| D4AAV4     | Arhgap17 | Rho GTPase activating protein 17                             | Ser574 $\uparrow$ [16.53] ( $\_1$ ), Thr748 $\uparrow$ [74.11] ( $\_2$ ), Ser751 $\uparrow$ [74.11] ( $\_2$ ), Thr752 $\downarrow$ [C] ( $\_2$ ) $\uparrow$ [AR] ( $\_3$ )                                                                             |
| F1M2D4     | Arhgap23 | Rho GTPase activating protein 23                             | Ser341 $\uparrow$ [AR] ( $\_2$ ), Ser352 $\uparrow$ [AR] ( $\_2$ )                                                                                                                                                                                     |
| F1MAK3     | Arhgap32 | Rho GTPase activating protein 32                             | Ser720 $\uparrow$ [AR] ( $\_2$ ), Ser723 $\uparrow$ [AR] ( $\_2$ ), Ser870 $\uparrow$ [18.24] ( $\_1$ ), Ser966 $\uparrow$ [AR] ( $\_1$ )                                                                                                              |
| D4AD82     | Arhgap35 | Rho GTPase activating protein 35                             | Ser773 $\uparrow$ [AR] ( $\_2$ ), Ser975 $\uparrow$ [14.54] ( $\_2$ ), Ser985 $\uparrow$ [13.43] ( $\_2$ ), Ser1127 $\uparrow$ [AR] ( $\_2$ ), Ser1176 $\uparrow$ [AR] ( $\_2$ ), Ser1179 $\uparrow$ [41.86] ( $\_1$ )                                 |
| A0A1B0GWY5 | Arhgef2  | Rho/Rac guanine nucleotide exchange factor 2                 | Ser925 $\uparrow$ [9.67] ( $\_3$ ), Ser937 $\uparrow$ [9.08] ( $\_2$ ), Ser940 $\uparrow$ [8.32] ( $\_2$ ), Ser944 $\uparrow$ [9.82] ( $\_3$ )                                                                                                         |
| A0A0G2QC21 | Arhgef7  | Rho guanine nucleotide exchange factor 7                     | Ser497 $\uparrow$ [AR] ( $\_1$ )                                                                                                                                                                                                                       |
| A0A0G2JZC6 | Arhgef11 | Rho guanine nucleotide exchange factor 11                    | Ser720 $\uparrow$ [7.48] ( $\_3$ ), Thr725 $\uparrow$ [7.48] ( $\_3$ ), Thr729 $\uparrow$ [7.48] ( $\_3$ ), Ser1511 $\uparrow$ [AR] ( $\_2$ ), Ser1512 $\uparrow$ [AR] ( $\_2$ ), Thr1515 $\uparrow$ [AR] ( $\_2$ ), Thr1516 $\uparrow$ [AR] ( $\_2$ ) |
| D3ZYR0     | Arhgef12 | Rho guanine nucleotide exchange factor 12                    | Ser 341 $\downarrow$ [C] ( $\_1$ ), Ser1176 $\uparrow$ [AR] ( $\_1$ )                                                                                                                                                                                  |
| P0C6P5     | Arhgef28 | Rho guanine nucleotide exchange factor 28                    | Ser312 $\uparrow$ [AR] ( $\_1$ ), Ser314 $\uparrow$ [12.33] ( $\_1$ )                                                                                                                                                                                  |

|            |          |                                                             |                                                                                                                                |
|------------|----------|-------------------------------------------------------------|--------------------------------------------------------------------------------------------------------------------------------|
| A0A0G2JZE7 | Arhgef40 | Rho guanine nucleotide exchange factor 40                   | Ser958 ↑[AR] ( _1)                                                                                                             |
| Q4V8I5     | Arl6ip4  | ADP-ribosylation factor like GTPase 6 interacting protein 4 | Ser142 ↓[C] ( _1)                                                                                                              |
| A0A0G2K451 | Asap1    | ArfGAP with SH3 domain, ankyrin repeat and PH domain 1      | Ser852 ↑[AR] ( _2), Ser855 ↑[AR] ( _2)                                                                                         |
| B2GUV8     | Bcl6     | B-cell CLL/lymphoma 6                                       | Ser308 ↑[AR] ( _2), Ser309 ↑[AR] ( _2)                                                                                         |
| F1LXF1     | Bcr      | BCR, RhoGEF and GTPase activating protein                   | Ser253 ↑[AR] ( _2), Ser256 ↑[AR] ( _2)                                                                                         |
| F1LMX1     | Bin1     | bridging integrator 1                                       | Ser299 ↑[477.71] ( _2), Ser305 ↑[13.43] ( _2), Ser325 ↑[36.60] ( _2)                                                           |
| D3ZML2     | Brsk2    | BR serine/threonine kinase 2                                | Ser424 ↑[13.84] ( _2), Ser428 ↓[C] ( _3) ↑[13.84] ( _2), Ser436 ↓[C] ( _3) ↑[AR] ( _2), Ser440 ↑[AR] ( _2), Ser490 ↑[AR] ( _1) |
| Q8K4S7     | Cblb     | Cbl proto-oncogene B                                        | Ser476 ↓[C] ( _3), Ser480 ↓[C] ( _3), Ser483 ↓[C] ( _3), Ser484 ↓[C] ( _2)                                                     |
| A0A0G2K5Z1 | Cdc42bpa | CDC42 binding protein kinase alpha                          | Ser1618 ↑[AR] ( _3), Ser1622 ↑[AR] ( _2), Ser1625 ↑[AR] ( _2)                                                                  |
| Q7TT49     | Cdc42bpb | CDC42 binding protein kinase beta                           | Ser1688 ↑[5.81] ( _3), Ser1692 ↑[5.81] ( _3), Ser1695 ↑[5.81] ( _3)                                                            |
| Q6P751     | Cdk2     | cyclin dependent kinase 2                                   | Thr14 ↑[134.24] ( _2), Tyr15 ↑[134.24] ( _2)                                                                                   |
| E2E1S0     | Cdk15    | cyclin-dependent kinase-like 5                              | Ser407 ↑[17.43] ( _1)                                                                                                          |
| G3V894     | Chrm4    | cholinergic receptor, muscarinic 4                          | Ser246 ↑[AR] ( _2), Ser252 ↑[AR] ( _2)                                                                                         |
| G3V8W8     | Cnksr1   | connector enhancer of kinase suppressor of Ras 1            | Thr284 ↑[AR] ( _2), Ser288 ↑[200.85] ( _2)                                                                                     |
| A0A1B0GWS4 | Cttn     | cortactin                                                   | Tyr139 ↓[C] ( _2)                                                                                                              |
| A0A0G2JTF2 | Dab2ip   | DAB2 interacting protein                                    | Ser719 ↑[AR] ( _1)                                                                                                             |
| A0A0G2KB92 | Dclk1    | doublecortin-like kinase 1                                  | Ser305 ↑[AR] ( _2), Ser307 ↑[AR] ( _2), Ser332 ↑[AR] ( _3), Thr336 ↑[AR] ( _2), Ser337 ↑[AR] ( _3)                             |
| F1M241     | Dennd1a  | DENN domain containing 1A                                   | Ser521 ↑[4.07] ( _2)                                                                                                           |
| F1LTD7     | Dennd4c  | DENN domain containing 4C                                   | Ser1310 ↓[C] ( _2), Ser1323 ↑[52.69] ( _2), Ser1336 ↑[52.69] ( _2)                                                             |
| G3V7Q0     | Dennd5a  | DENN domain containing 5A                                   | Thr1079 ↑[AR] ( _2), Ser1085 ↑[AR] ( _2)                                                                                       |
| D4A544     | Dennd6a  | DENN domain containing 6A                                   | Ser13 ↑[AR] ( _2), Ser16 ↑[AR] ( _1), Ser16 ↑[AR] ( _2)                                                                        |
| A0A0G2K9I2 | Dlc1     | DLC1 Rho GTPase activating protein                          | Ser163 ↑[AR] ( _1)                                                                                                             |
| A0A0G2KAH4 | Dock6    | dedicator of cytokinesis 6                                  | Ser1409 ↑[AR] ( _1)                                                                                                            |
| F1LRS2     | Dock7    | dedicator of cytokinesis 7                                  | Ser904 ↑[72.55] ( _2), Ser906 ↑[72.55] ( _2), Ser1408 ↑[28.12] ( _1), Ser1410 ↑[AR] ( _2), Ser1416 ↑[22.61] ( _1)              |
| Q9WVB9     | Dvl1     | dishevelled segment polarity protein 1                      | Ser194 ↑[AR] ( _1)                                                                                                             |
| D3ZB71     | Dvl2     | dishevelled segment polarity protein 2                      | Ser211 ↓[C] ( _1)                                                                                                              |
| D4ADV8     | Dvl3     | dishevelled segment polarity protein 3                      | Ser48 ↑[AR] ( _1)                                                                                                              |
| G3V6K6     | Egfr     | epidermal growth factor receptor                            | Ser1165 ↑[AR] ( _1)                                                                                                            |
| Q07205     | Eif5     | eukaryotic translation initiation factor 5                  | Ser387 ↑[66.50] ( _2), Ser388 ↑[66.50] ( _2), Ser417 ↑[AR] ( _1)                                                               |
| F7DLY1     | Eps8l2   | EPS8-like 2                                                 | Ser482 ↑[AR] ( _1), Ser483 ↑[AR] ( _1)                                                                                         |
| B5DFE2     | Ezh2     | enhancer of zeste 2 polycomb repressive complex 2 subunit   | Ser362 ↑[AR] ( _2), Ser363 ↑[AR] ( _2)                                                                                         |
| Q9JHY1     | F11r     | F11 receptor                                                | Ser285 ↑[AR] ( _2), Ser288 ↑[AR] ( _2)                                                                                         |

|            |         |                                                                                        |                                                                                                                                                                                            |
|------------|---------|----------------------------------------------------------------------------------------|--------------------------------------------------------------------------------------------------------------------------------------------------------------------------------------------|
| F1LYQ8     | Farp1   | FERM, ARH/RhoGEF and pleckstrin domain protein 1                                       | Thr371 ↑[AR] (2), Ser373 ↑[AR] (2), Ser893 ↑[16.79] (3), Ser900 ↑[16.67] (3), Ser903 ↑[64.70] (3)                                                                                          |
| D3ZFK8     | Farp2   | FERM, ARH/RhoGEF and pleckstrin domain protein 2                                       | Thr374 ↑[AR] (2), Ser375 ↑[AR] (2), Thr378 ↑[AR] (2), Ser474 ↑[AR] (2), Ser477 ↓[C] (2), Ser511 ↑[AR] (2)                                                                                  |
| Q2HWF0     | Fnbp11  | formin binding protein 1-like                                                          | Ser501 ↑[AR] (3) ↓[C] (1), Ser505 ↑[3.13] (2)                                                                                                                                              |
| D4A022     | Gapvd1  | GTPase activating protein and VPS9 domains 1                                           | Ser466 ↑[25.30] (2), Ser785 ↑[AR] (2), Ser788 ↑[65.34] (2), Thr789 ↑[65.34] (2), Ser971 ↑[60.26] (2), Ser802 ↑[AR] (3)                                                                     |
| A0A0G2K3N1 | Gbf1    | golgi brefeldin A resistant guanine nucleotide exchange factor 1                       | Ser340 ↑[AR] (2), Ser345 ↑[19.84] (2), Ser1293 ↑[AR] (1)                                                                                                                                   |
| A0A0G2K527 | Git1    | GIT ArfGAP 1                                                                           | Ser376 ↑[AR] (2), Ser376 ↑[AR] (3), Thr383 ↑[AR] (2), Ser583 ↑[AR] (2), Ser587 ↑[AR] (2), Tyr589 ↑[AR] (2)                                                                                 |
| Q66H91     | Git2    | GIT ArfGAP 2                                                                           | Tyr392 ↑[AR] (2), Ser394 ↓[C] (3)                                                                                                                                                          |
| Q9WVE9     | Itsn1   | intersectin 1                                                                          | Ser334 ↑[8.48] (2), Ser335 ↑[8.48] (2), Ser894 ↓[C] (2), Ser896 ↑[AR] (1)                                                                                                                  |
| M0R7A6     | Itsn2   | intersectin 2                                                                          | Ser231 ↓[C] (1), Ser908 ↓[C] (1)                                                                                                                                                           |
| F1LZV1     | Kalrn   | kalirin, RhoGEF kinase                                                                 | Ser1790 ↑[AR] (1), Ser1808 ↑[AR] (1)                                                                                                                                                       |
| M0RBD3     | Ksr2    | kinase suppressor of ras 2 late endosomal/lysosomal adaptor, MAPK and MTOR activator 1 | Thr272 ↑[19.47] (2), Thr276 ↑[6.67] (2)                                                                                                                                                    |
| Q6P791     | Lamtor1 |                                                                                        | Ser26 ↑[AR] (1)                                                                                                                                                                            |
| G3V6I1     | Llgl1   | LLGL1, scribble cell polarity complex component                                        | Ser997 ↑[AR] (3)                                                                                                                                                                           |
| D3ZBH5     | Lmtk2   | lemur tyrosine kinase 2                                                                | Ser576 ↑[AR] (2), Ser704 ↑[AR] (1), Ser712 ↑[AR] (2), Ser746 ↑[7.46] (2), Ser750 ↑[9.64] (2), Ser756 ↑[AR] (2), Ser1035 ↑[AR] (1), Ser1334 ↑[AR] (3), Ser1524 ↑[AR] (2), Ser1525 ↑[AR] (2) |
| O08873     | Madd    | MAP-kinase activating death domain                                                     | Ser1196 ↓[C] (1)                                                                                                                                                                           |
| P15205     | Map1b   | microtubule-associated protein 1B                                                      | Ser1148 ↑[AR] (1), Ser1305 ↓[C] (1), Ser1371 ↓[C] (1), Thr1781 ↓[C] (3)                                                                                                                    |
| D3Z8I4     | Map4k1  | mitogen activated protein kinase kinase kinase kinase 1                                | Ser373 ↓[C] (2), Ser375 ↓[C] (2), Tyr379 ↑[4.06] (2)                                                                                                                                       |
| A0JN25     | Mapt    | Microtubule-associated protein tau                                                     | Ser306 ↓[C] (2)                                                                                                                                                                            |
| F1LMW7     | Marcks  | Myristoylated alanine rich protein kinase C substrate                                  | Ser27 ↓[C] (1)                                                                                                                                                                             |
| A0A0G2K7H9 | Mark1   | microtubule affinity regulating kinase 1                                               | Ser348 ↑[AR] (2)                                                                                                                                                                           |
| D3ZL30     | Mast3   | microtubule associated serine/threonine kinase 3                                       | Ser354 ↑[12.14] (1), Ser1201 ↑[AR] (2), Ser1213 ↑[AR] (2)                                                                                                                                  |
| Q63406     | Mcf2l   | MCF.2 cell line derived transforming sequence-like                                     | Ser964 ↑[AR] (2)                                                                                                                                                                           |
| A0A0G2K382 | Mink1   | misshapen-like kinase 1                                                                | Ser760 ↑[AR] (1), Ser777 ↑[AR] (2), Ser781 ↑[AR] (1)                                                                                                                                       |
| A0A0G2K2Y8 | Mpdz    | multiple PDZ domain crumbs cell polarity complex component                             | Ser1816 ↑[AR] (2), Ser1818 ↑[AR] (3), Ser1822 ↑[AR] (3)                                                                                                                                    |
| A0A140TA95 | Mprip   | myosin phosphatase Rho interacting protein                                             | Ser230 ↑[9.91] (2), Ser294 ↑[AR] (2)                                                                                                                                                       |
| A0A0G2JX74 | Mtor    | mechanistic target of rapamycin                                                        | Ser2478 ↑[AR] (2), Ser2481 ↑[AR] (2)                                                                                                                                                       |

|            |           |                                                           |                                                                                                                                                   |
|------------|-----------|-----------------------------------------------------------|---------------------------------------------------------------------------------------------------------------------------------------------------|
| D4A2D3     | Mycbp2    | MYC binding protein 2, E3 ubiquitin protein ligase        | Ser2644 ↑[19.17] ( _2), Ser2646 ↑[19.30] ( _2), Ser3791 ↑[AR] ( _2), Ser3792 ↑[AR] ( _2)                                                          |
| Q4W1H3     | Myo9b     | myosin IXb                                                | Ser1207 ↑[AR] ( _1), Ser1250 ↑[19.19] ( _2), Ser1252 ↑[19.19] ( _2), Ser1259 ↑[AR] ( _2), Ser1267 ↑[AR] ( _2), Ser1982 ↓[C] ( _1) ↑[25.47] ( _2)  |
| A0A0G2JWL3 | Nf1       | neurofibromin 1                                           | Ser821 ↑[AR] ( _2), Ser824 ↑[AR] ( _2), Ser2488 ↑[AR] ( _1)                                                                                       |
| Q4G017     | Nisch     | nischarin                                                 | Ser1282 ↑[AR] ( _1)                                                                                                                               |
| P35465     | Pak1      | p21 (RAC1) activated kinase 1                             | Thr184 ↑[AR] ( _1), Ser219 ↑[AR] ( _2), Ser222 ↑[AR] ( _1), Thr228 ↓[C] ( _1), Thr229 ↑[AR] ( _2)                                                 |
| F1M785     | Pdzd2     | PDZ domain containing 2                                   | Ser788 ↑[3.54] ( _2), Thr793 ↑[3.54] ( _2), Ser797 ↑[AR] ( _2), Ser887 ↑[AR] ( _1), Ser1205 ↑[AR] ( _2), Ser1894 ↑[AR] ( _2), Ser1898 ↑[AR] ( _2) |
| D3ZXY2     | Pdzd8     | PDZ domain containing 8                                   | Ser520 ↑[AR] ( _1), Ser537 ↑[AR] ( _1)                                                                                                            |
| M0R7T1     | Phactr4   | phosphatase and actin regulator 4                         | Ser136 ↑[8.38] ( _2)                                                                                                                              |
| D3ZYT8     | Pikfyve   | phosphoinositide kinase, FYVE-type zinc finger containing | Ser487 ↑[AR] ( _2), Thr489 ↑[AR] ( _2)                                                                                                            |
| A0A0G2K6J2 | Pkn2      | protein kinase N2                                         | Ser468 ↑[22.69] ( _1)                                                                                                                             |
| F1M2K6     | Pkp4      | plakophilin 4                                             | Ser220 ↑[12.99] ( _2), Ser230 ↑[12.99] ( _2), Ser272 ↑[AR] ( _2), Ser509 ↑[AR] ( _2), Ser511 ↑[AR] ( _1)                                          |
| Q45QJ4     | Plcb3     | phospholipase C beta 3                                    | Ser537 ↑[AR] ( _1)                                                                                                                                |
| G3V9D1     | Plcd1     | phospholipase C, delta 1                                  | Ser454 ↑[AR] ( _2), Thr457 ↓[C] ( _2), Ser460 ↑[AR] ( _2)                                                                                         |
| Q6J4I0     | Ppp1r1b   | protein phosphatase 1, regulatory (inhibitor) subunit 1B  | Ser102 ↑[11.17] ( _1)                                                                                                                             |
| P54645     | Prkaa1    | protein kinase AMP-activated catalytic subunit alpha 1    | Thr488 ↑[AR] ( _2), Ser527 ↑[AR] ( _2) ↓[C] ( _3)                                                                                                 |
| A0A0G2K5Q0 | Prkcb     | protein kinase C, beta                                    | Ser639 ↑[AR] ( _1)                                                                                                                                |
| D4A0U0     | Prkcd     | protein kinase C, delta                                   | Ser642 ↑[AR] ( _1)                                                                                                                                |
| A0A0G2K928 | Prkd1     | protein kinase D1                                         | Ser161 ↑[24.30] ( _2), Ser164 ↑[24.30] ( _2), Ser361 ↓[C] ( _2), Ser361 ↑[25.40] ( _1), Thr364 ↓[C] ( _2)                                         |
| Q5XIS9     | Prkd2     | protein kinase D2                                         | Ser197 ↑[AR] ( _2), Ser198 ↑[AR] ( _2), Ser206 ↑[AR] ( _2), Ser711 ↑[AR] ( _1)                                                                    |
| G3V8J5     | Psd       | pleckstrin and Sec7 domain containing                     | Ser719 ↑[AR] ( _1)                                                                                                                                |
| A0A0G2K064 | Ptpn6     | protein tyrosine phosphatase, non-receptor type 6         | Ser10 ↑[AR] ( _1)                                                                                                                                 |
| A0A0G2JYK2 | Rab11fip1 | RAB11 family interacting protein 1                        | Ser990 ↓[C] ( _2)                                                                                                                                 |
| P35284     | Rab12     | RAB12, member RAS oncogene family                         | Ser20 ↑[AR] ( _2), Ser24 ↑[AR] ( _2)                                                                                                              |
| G3V9J7     | Rabep1    | rabaptin, RAB GTPase binding effector protein 1           | Ser407 ↑[5.09] ( _1), Thr408 ↑[AR] ( _2)                                                                                                          |
| Q5EBC7     | Rabep2    | rabaptin, RAB GTPase binding effector protein 2           | Ser176 ↑[13.04] ( _2), Ser180 ↑[13.04] ( _2)                                                                                                      |
| D3ZX42     | Rabgap1   | RAB GTPase activating protein 1                           | Ser988 ↓[C] ( _2), Thr992 ↓[C] ( _2)                                                                                                              |
| D3ZKH6     | Rabgap11  | RAB GTPase activating protein 1-like                      | Ser128 ↑[24.39] ( _2)                                                                                                                             |

|            |          |                                                                 |                                                                                                                                                                           |
|------------|----------|-----------------------------------------------------------------|---------------------------------------------------------------------------------------------------------------------------------------------------------------------------|
| Q5FVT1     | Ralbp1   | ralA binding protein 1                                          | Ser29 ↑[AR] (2), Ser30 ↑[AR] (2), Ser48 ↑[190.30] (2), Ser62 ↑[190.30] (2)                                                                                                |
| A0A140TAA3 | Ralgapa1 | Ral GTPase activating protein catalytic alpha subunit 1         | Thr540 ↑[AR] (1), Ser647 ↑[AR] (3)                                                                                                                                        |
| A0A0G2KA57 | Ralgapb  | Ral GTPase activating protein non-catalytic beta subunit        | Thr313 ↑[AR] (1)                                                                                                                                                          |
| Q0VVK1     | Ralgps2  | Ral GEF with PH domain and SH3 binding motif 2                  | Ser293 ↑[AR] (1), Ser296 ↑[2.12] (2), Ser308 ↑[2.12] (2), Ser315 ↑[AR] (3), Ser316 ↓[C] (3) ↑[4.92] (2), Thr326 ↓[C] (3), Ser329 ↓[C] (3)                                 |
| D4A2G9     | Ranbp1   | RAN binding protein 1                                           | Ser14 ↑[AR] (3), Thr15 ↑[AR] (3), Ser21 ↑[AR] (1)                                                                                                                         |
| D4A054     | Ranbp2   | RAN binding protein 2                                           | Ser1154 ↑[AR] (1), Ser2511 ↑[62.50] (1)                                                                                                                                   |
| M0R920     | Ranbp3   | RAN binding protein 3                                           | Ser27 ↓[C] (3), Ser30 ↓[C] (3), Ser31 ↓[C] (3), Ser31 ↑[AR] (2), Ser409 ↑[AR] (2)                                                                                         |
| F1LVV3     | Ranbp9   | RAN binding protein 9                                           | Ser440 ↑[AR] (3), Ser446 ↑[57.73] (2), Ser459 ↑[AR] (1)                                                                                                                   |
| F1LV89     | Rap1gap  | Rap1 GTPase-activating protein                                  | Ser589 ↑[AR] (1)                                                                                                                                                          |
| D3ZPI4     | Rap1gap2 | RAP1 GTPase activating protein 2                                | Ser361 ↓[C] (2)                                                                                                                                                           |
| F1M8L9     | Rapgef1  | Rap guanine nucleotide exchange factor 1                        | Ser375 ↑[AR] (1)                                                                                                                                                          |
| D3ZTL8     | Rapgef6  | Rap guanine nucleotide exchange factor 6                        | Ser1241 ↑[21.40] (2) ↑[AR], Ser1245 ↑[AR] (3), Ser1595 ↓[C] (1)                                                                                                           |
| D4ADX8     | Raph1    | Ras association (RalGDS/AF-6) and pleckstrin homology domains 1 | Ser5 ↑[7.37] (2), Ser17 ↑[7.37] (2)                                                                                                                                       |
| P33568     | Rb1      | RB transcriptional corepressor 1                                | Thr363 ↑[AR] (2), Thr366 ↑[AR] (2), Ser600 ↑[12.79] (2), Ser604 ↑[12.79] (2)                                                                                              |
| D3ZL11     | Rbsn     | rabenosyn, RAB effector                                         | Ser216 ↑[AR] (2), Ser218 ↑[10.22] (2)                                                                                                                                     |
| D4AB55     | Rgs12    | regulator of G-protein signaling 12                             | Ser104 ↑[AR] (2), Ser105 ↑[AR] (2), Ser106 ↑[AR] (2)                                                                                                                      |
| B1H241     | Ric8a    | RIC8 guanine nucleotide exchange factor A                       | Tyr434 ↑[2.57] (2), Ser435 ↑[13.73] (2), Thr440 ↑[13.73] (2)                                                                                                              |
| D3ZN37     | Rock1    | Rho-associated coiled-coil containing protein kinase 1          | Ser1105 ↑[8.38] (2)                                                                                                                                                       |
| F1LQT3     | Rock2    | Rho-associated coiled-coil containing protein kinase 2          | Ser1124 ↑[AR] (2) ↑[AR] (1), Ser1127 ↑[6.58] (2)                                                                                                                          |
| D3Z8E0     | Rps6ka3  | ribosomal protein S6 kinase A3                                  | Ser715 ↑[AR] (1)                                                                                                                                                          |
| Q0D2L6     | Rragc    | Ras-related GTP binding C                                       | Ser94 ↑[28.17] (1)                                                                                                                                                        |
| D3ZI11     | Rreb1    | ras responsive element binding protein 1                        | Ser1137 ↑[AR] (2), Ser1138 ↑[AR] (2), Ser1177 ↑[AR] (2), Ser1178 ↑[AR] (2), Ser1306 ↑[AR] (1), Ser1361 ↓[C] (2), Ser1364 ↓[C] (2), Ser1590 ↑[AR] (2)                      |
| G3V7X2     | Scg2     | secretogranin II                                                | Ser176 ↑[AR] (1), Ser495 ↓[C] (1)                                                                                                                                         |
| D3ZWS0     | Scrib    | scribbled planar cell polarity protein                          | Ser692 ↑[AR] (1), Ser1204 ↑[AR] (2), Ser1207 ↑[11.30] (2), Ser1209 ↑[2.85] (2)                                                                                            |
| M0R617     | Sh2b1    | SH2B adaptor protein 1                                          | Ser126 ↑[AR] (1) ↑[AR] (3), Ser127 ↑[AR] (1) ↑[AR] (3)                                                                                                                    |
| Q9Z200     | Sh2b2    | SH2B adaptor protein 2                                          | Ser584 ↑[24.73] (2)                                                                                                                                                       |
| E9PSX8     | Sipa1    | signal-induced proliferation-associated 1                       | Ser53 ↑[AR] (2), Ser65 ↑[AR] (2)                                                                                                                                          |
| A0A0G2KAW2 | Sipa1l1  | signal-induced proliferation-associated 1 like 1                | Ser310 ↑[AR] (1), Thr1530 ↑[AR] (1), Ser1544 ↑[AR] (2), Ser1547 ↑[AR] (2), Ser1618 ↑[AR] (3) ↑[AR] (2), Ser1624 ↑[AR] (2), Ser1626 ↑[AR] (2), Ser1629 ↑[AR] (2) ↑[AR] (3) |



|            |          |                                                  |                                                                                                                                   |
|------------|----------|--------------------------------------------------|-----------------------------------------------------------------------------------------------------------------------------------|
| FILYG2     | Sipa1l3  | signal-induced proliferation-associated 1 like 3 | Ser1358 ↑[AR] (1)                                                                                                                 |
| A0A0G2K9N0 | Smap2    | small ArfGAP2                                    | Ser193 ↑[AR] (1)                                                                                                                  |
| Q63553     | Snrk     | SNF related kinase                               | Ser569 ↑[AR] (1)                                                                                                                  |
| B1H267     | Snx5     | Sorting nexin 5                                  | Ser20 ↓[C] (1), Ser22 ↓[C] (1)                                                                                                    |
| P07632     | Sod1     | superoxide dismutase 1, soluble                  | Ser99 ↑[AR] (1)                                                                                                                   |
| D4A3T0     | Sos1     | SOS Ras/Rac guanine nucleotide exchange factor 1 | Ser1078 ↓[C] (2), Ser1082 ↓[C] (2), Thr1249 ↑[AR] (2), Ser1251 ↑[AR] (2), Thr1255 ↑[AR] (2), Ser1318 ↑[AR] (1), Ser1319 ↑[AR] (1) |
| D3ZEX7     | Spire1   | Spire-type actin nucleation factor 1             | Ser399 ↓[C] (3), Ser400 ↓[C] (3), Ser402 ↓[C] (3)                                                                                 |
| Q9WUD9     | Src      | SRC proto-oncogene, non-receptor tyrosine kinase | Ser75 ↑[10.91] (1)                                                                                                                |
| D4A208     | Srgap2   | SLIT-ROBO Rho GTPase activating protein 2        | Ser994 ↑[6.28] (2)                                                                                                                |
| E9PTN4     | Srpkl    | SRSF protein kinase 1                            | Ser51 ↑[3.40] (2), Ser309 ↑[AR] (2), Ser311 ↑[AR] (2)                                                                             |
| A0A0G2JX62 | Srpkl    | SRSF protein kinase 2                            | Ser487 ↑[AR] (2), Thr491 ↑[AR] (2)                                                                                                |
| B1WBQ5     | Stk3     | serine/threonine kinase 3                        | Ser316 ↑[29.15] (1)                                                                                                               |
| A0A096MK73 | Stmn1    | stathmin 1                                       | Ser25 ↑[12.28] (1), Ser38 ↑[23.17] (1), Ser46 ↑[AR] (1)                                                                           |
| A0A0G2K8P5 | Stmn3    | stathmin 3                                       | Ser50 ↑[AR] (2), Ser53 ↑[AR] (2)                                                                                                  |
| A0A0G2K6Y9 | Stx7     | Syntaxin 7                                       | Ser196 ↑[7.69] (2), Ser203 ↑[7.69] (2)                                                                                            |
| Q9WU70     | Stxbp5   | syntaxin binding protein 5                       | Ser724 ↑[AR] (2)                                                                                                                  |
| D3Z881     | Tbc1d4   | TBC1 domain family, member 4                     | Ser597 ↑[AR] (2), Ser600 ↑[AR] (2)                                                                                                |
| F1LWZ7     | Tbc1d8   | TBC1 domain family, member 8                     | Ser464 ↑[AR] (1)                                                                                                                  |
| Q587K3     | Tbc1d10a | TBC1 domain family, member 10a                   | Ser45 ↑[5.73] (2)                                                                                                                 |
| D3ZSY8     | Tbc1d10b | TBC1 domain family, member 10b                   | Ser234 ↑[AR] (2), Ser644 ↑[AR] (2)                                                                                                |
| B1WBS1     | Tbc1d25  | TBC1 domain family, member 25                    | Ser506 ↑[AR] (1)                                                                                                                  |
| D3ZWV8     | Tiam1    | T-cell lymphoma invasion and metastasis 1        | Ser725 ↑[AR] (1), Ser1462 ↑[AR] (2)                                                                                               |
| F1LPP2     | Tlk2     | tousled-like kinase 2                            | Ser749 ↑[AR] (1)                                                                                                                  |
| D3ZZQ0     | Tnik     | TRAF2 and NCK interacting kinase                 | Ser640 ↑[15.17] (1), Ser678 ↑[AR] (2), Ser680 ↑[AR] (2), Ser769 ↑[AR] (1)                                                         |
| O08629     | Trim28   | tripartite motif-containing 28                   | Ser27 ↑[AR] (2), Ser52 ↑[AR] (1), Ser502 ↑[AR] (1), Ser595 ↑[AR] (2) ↓[-46.22] (3), Ser597 ↓[-38.19] (3)                          |
| A0A1P0PBZ6 | Trio     | trio Rho guanine nucleotide exchange factor      | Ser2408 ↑[AR] (2), Ser2412 ↑[AR] (2)                                                                                              |
| Q9Z136     | Tsc1     | tuberous sclerosis 1                             | Ser561 ↑[AR] (2), Ser565 ↑[AR] (2)                                                                                                |
| D3ZLW4     | Tsc2     | tuberous sclerosis 2                             | Ser1389 ↑[3.55] (2)                                                                                                               |
| A0A0G2K3A0 | Wnk1     | WNK lysine deficient protein kinase 1            | Ser2154 ↑[AR] (1)                                                                                                                 |
| D3ZMJ7     | Wnk2     | WNK lysine deficient protein kinase 2            | Ser45 ↑[AR] (1), Ser1774 ↑[AR] (1), Ser1830 ↑[16.53] (2), Ser1831 ↑[16.53] (2)                                                    |
| A0A1W2Q6C5 | Wnk3     | WNK lysine deficient protein kinase 3            | Ser436 ↑[AR] (3), Thr449 ↑[AR] (3)                                                                                                |

↑, elevated phosphorylation; ↓, decreased phosphorylation; ↓[C], detected only in control (negative siRNA-treated) cells; ↑[AR], detected only in β-arrestin2-deficient cells; (1, 2, 3), multiplicity

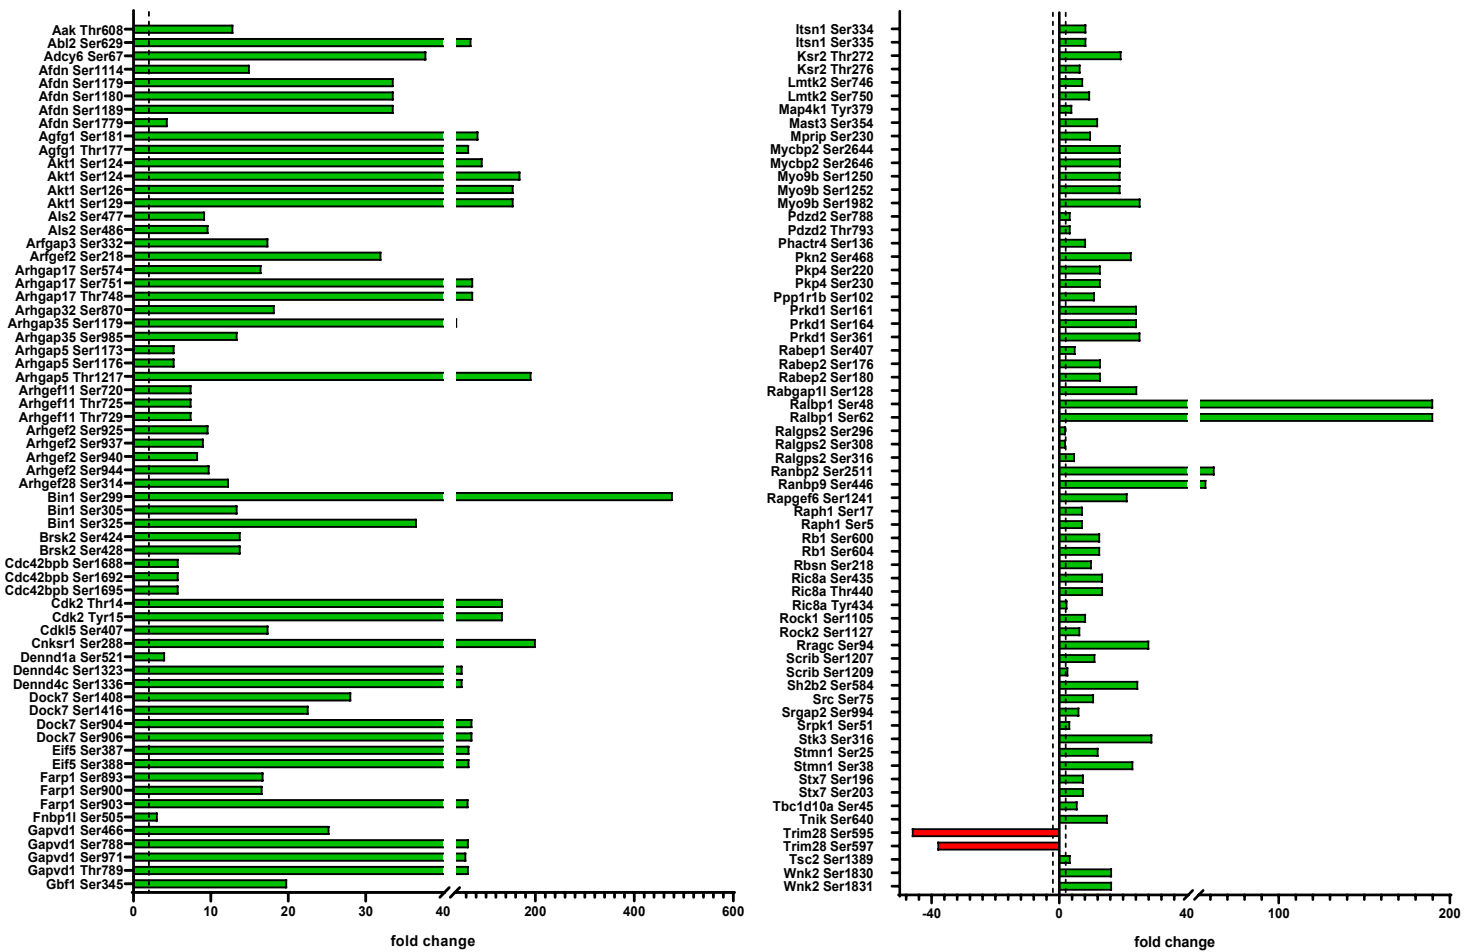

**Figure S2.** Quantitative changes in phosphoproteins involved in the regulation of small GTPase activity in GH1 cells after siRNA-mediated  $\beta$ -arrestin2 knockdown

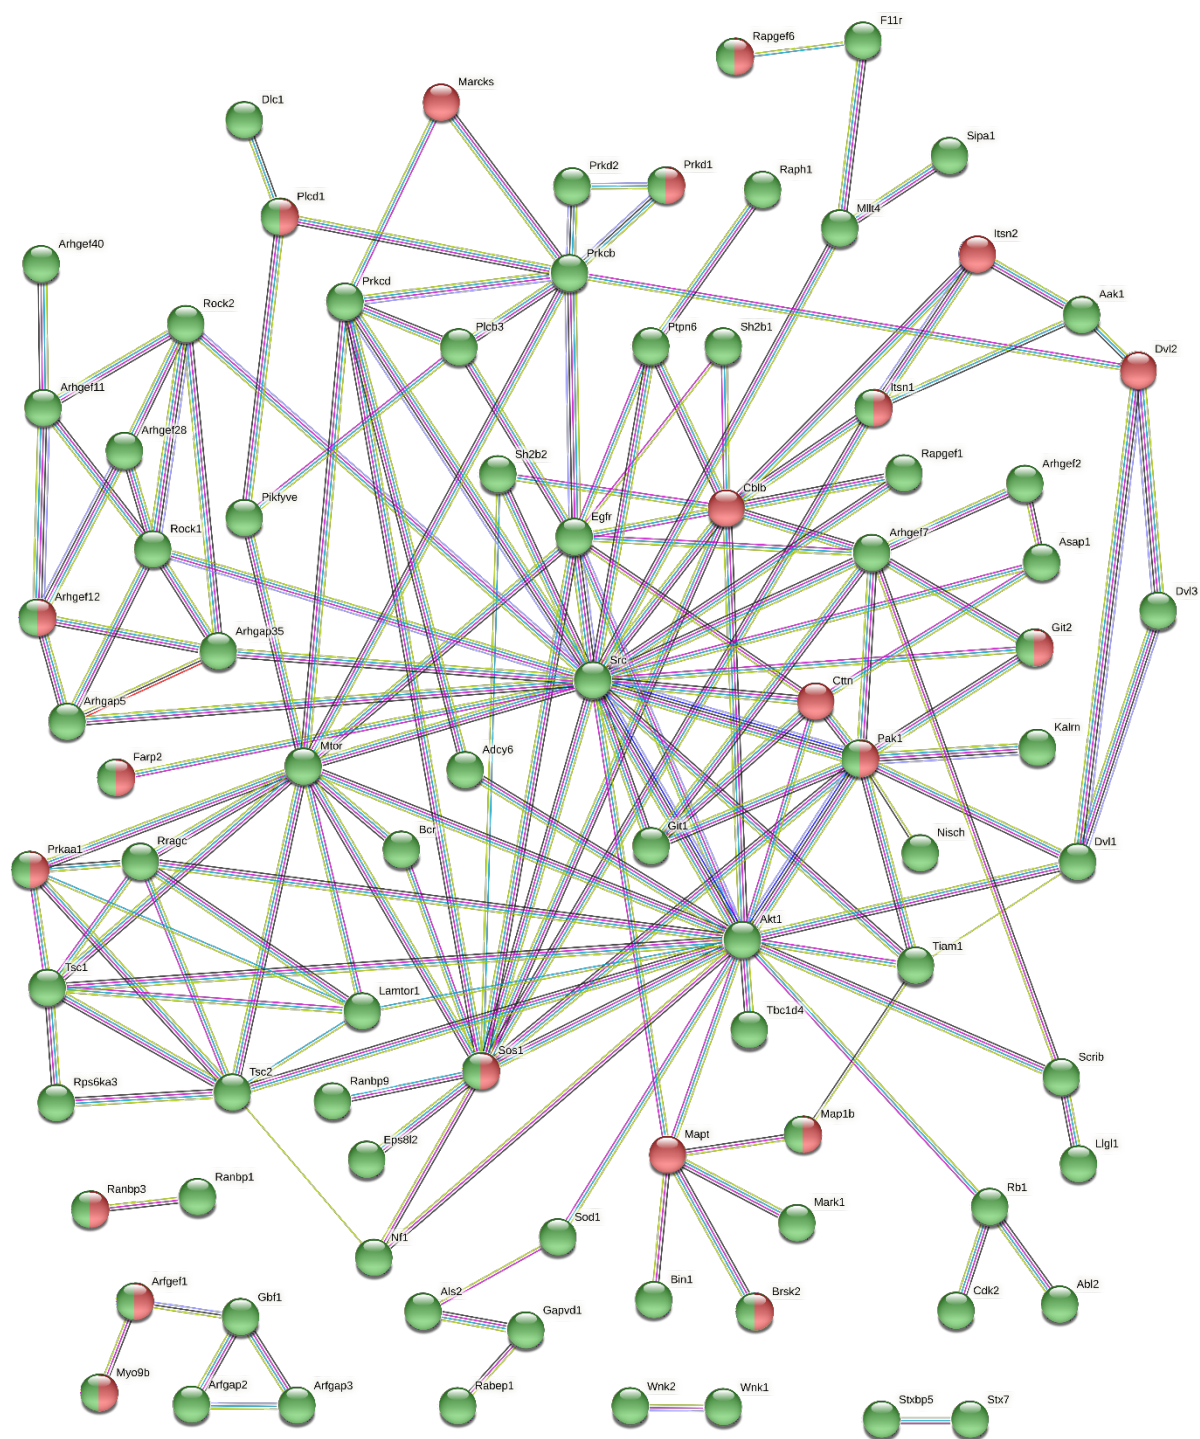

**Figure S3.** A network of differentially phosphorylated proteins involved in the regulation of small GTPase activity in GH1 cells after siRNA-mediated  $\beta$ arrestin-2 knockdown. Elevated phosphorylation in green, decreased phosphorylation in red.

**Table S2.** A list of differentially phosphorylated proteins involved in the regulation of small GTPase activity in GH1 cells after stimulation with 1  $\mu$ M TRH

| Uniprot ID | Gene ID  | Gene name                                                               | Phosphorylated regions                                                                                                                                                        |
|------------|----------|-------------------------------------------------------------------------|-------------------------------------------------------------------------------------------------------------------------------------------------------------------------------|
| F1LR17     | Aak1     | AP2 associated kinase 1                                                 | Ser626 $\uparrow$ [TRH] ( $\_2$ )                                                                                                                                             |
| F1M9N7     | Agfg1    | ArfGAP with FG repeats 1                                                | Thr177 $\downarrow$ [C] ( $\_2$ ), Ser181 $\downarrow$ [C] ( $\_2$ )                                                                                                          |
| P47196     | Akt1     | AKT serine/threonine kinase 1                                           | Ser126 $\uparrow$ [TRH] ( $\_2$ ) $\downarrow$ [C] ( $\_1$ )                                                                                                                  |
| A0A0G2JWD6 | Ap3b1    | adaptor-related protein complex 3, beta 1 subunit                       | Ser276 $\downarrow$ [C] ( $\_1$ )                                                                                                                                             |
| D4A631     | Arfgef1  | ADP ribosylation factor guanine nucleotide exchange factor 1            | Ser394 $\downarrow$ [C] ( $\_2$ )                                                                                                                                             |
| Q7TSU1     | Arfgef2  | ADP ribosylation factor guanine nucleotide exchange factor 2            | Ser227 $\downarrow$ [C] ( $\_1$ )                                                                                                                                             |
| A0A0G2JYA2 | Arfp1    | ADP-ribosylation factor interacting protein 1                           | Ser5 $\downarrow$ [C] ( $\_1$ )                                                                                                                                               |
| D4AAV4     | Arhgap17 | Rho GTPase activating protein 17                                        | Ser574 $\downarrow$ [C] ( $\_1$ ), Thr742 $\downarrow$ [C] ( $\_3$ ), Thr746 $\downarrow$ [C] ( $\_3$ ), Thr748 $\downarrow$ [C] ( $\_3$ ), Ser751 $\downarrow$ [C] ( $\_3$ ) |
| D4AD82     | Arhgap35 | Rho GTPase activating protein 35                                        | Ser975 $\downarrow$ [C] ( $\_1$ ), Ser1174 $\downarrow$ [C] ( $\_2$ ), Ser1179 $\downarrow$ [C] ( $\_2$ ),                                                                    |
| A0A1B0GWY5 | Arhgef 2 | Rho/Rac guanine nucleotide exchange factor 2                            | Ser937 $\downarrow$ [C] ( $\_2$ ), Ser940 $\downarrow$ [C] ( $\_2$ )                                                                                                          |
| A0A0G2JZC6 | Arhgef11 | Rho guanine nucleotide exchange factor 11                               | Ser308 $\downarrow$ [C] ( $\_3$ )                                                                                                                                             |
| P0C6P5     | Arhgef28 | Rho guanine nucleotide exchange factor 28                               | Ser314 $\downarrow$ [C] ( $\_1$ ), Thr1197 $\downarrow$ [C] ( $\_2$ ), Ser1198 $\downarrow$ [C] ( $\_2$ ), Ser1200 $\downarrow$ [C] ( $\_2$ )                                 |
| Q4V8I5     | Arl6ip4  | ADP ribosylation factor like GTPase 6 interacting protein 4             | Ser142 $\downarrow$ [C] ( $\_1$ )                                                                                                                                             |
| F1LMX1     | Bin1     | bridging integrator 1                                                   | Ser297 $\downarrow$ [-25.16] ( $\_1$ ), Ser325 $\downarrow$ [C] ( $\_2$ ), Ser333 $\downarrow$ [C] ( $\_2$ ) $\downarrow$ [C] ( $\_1$ )                                       |
| D3ZML2     | Brsk2    | BR serine/threonine kinase 2                                            | Ser424 $\downarrow$ [C] ( $\_2$ ), Ser428 $\downarrow$ [C] ( $\_2$ ) $\downarrow$ [C] ( $\_3$ ), Ser436 $\downarrow$ [C] ( $\_3$ )                                            |
| Q8K4S7     | Cblb     | Cbl proto-oncogene B                                                    | Ser476 $\downarrow$ [C] ( $\_3$ ), Ser480 $\downarrow$ [C] ( $\_3$ ), Ser483 $\downarrow$ [C] ( $\_3$ ), Ser484 $\downarrow$ [C] ( $\_2$ )                                    |
| Q7TT49     | Cdc42bpb | CDC42 binding protein kinase beta                                       | Ser1692 $\downarrow$ [C] ( $\_1$ )                                                                                                                                            |
| A0A1B0GWS4 | Ctnn     | cortactin                                                               | Tyr139 $\downarrow$ [C] ( $\_2$ )                                                                                                                                             |
| A0A0G2KB92 | Dclk1    | doublecortin-like kinase 1                                              | Ser363 $\downarrow$ [C] ( $\_2$ ), Ser364 $\downarrow$ [C] ( $\_2$ ), Ser364 $\downarrow$ [C] ( $\_1$ )                                                                       |
| F1LTD7     | Dennd4c  | DENN domain containing 4C                                               | Ser1310 $\downarrow$ [C] ( $\_2$ )                                                                                                                                            |
| F1LRS2     | Dock7    | dedicator of cytokinesis 7                                              | Ser904 $\downarrow$ [C] ( $\_2$ ), Ser906 $\downarrow$ [C] ( $\_2$ ), Ser918 $\downarrow$ [C] ( $\_2$ )                                                                       |
| D4ADV8     | Dvl3     | dishevelled segment polarity protein 3                                  | Ser125 $\downarrow$ [C] ( $\_1$ )                                                                                                                                             |
| D3ZFK8     | Farp2    | FERM, ARH/RhoGEF and pleckstrin domain protein 2                        | Ser474 $\downarrow$ [C] ( $\_3$ ), Ser477 $\downarrow$ [C] ( $\_2$ ) $\downarrow$ [C] ( $\_3$ )                                                                               |
| Q2HWF0     | Fnbp11   | formin binding protein 1-like                                           | Ser501 $\downarrow$ [C] ( $\_2$ ) $\downarrow$ [C] ( $\_1$ ), Ser505 $\downarrow$ [-5.52] ( $\_2$ )                                                                           |
| D4A022     | Gapvd1   | GTPase activating protein and VPS9 domains 1                            | Ser788 $\downarrow$ [C] ( $\_2$ )                                                                                                                                             |
| A0A0G2K3N1 | Gbf1     | <u>golgi brefeldin A resistant guanine nucleotide exchange factor 1</u> | Ser340 $\uparrow$ [TRH] ( $\_2$ )                                                                                                                                             |
| A0A0G2K527 | Git1     | GIT ArfGAP 1                                                            | Ser379 $\downarrow$ [C] ( $\_3$ ), Thr383 $\downarrow$ [C] ( $\_3$ )                                                                                                          |
| Q66H91     | Git2     | GIT ArfGAP 2                                                            | Ser394 $\downarrow$ [C] ( $\_2$ ) $\downarrow$ [-5.24] ( $\_3$ )                                                                                                              |
| Q9WVE9     | Itsn1    | intersectin 1                                                           | Ser894 $\downarrow$ [C] ( $\_1$ ) $\downarrow$ [C] ( $\_2$ )                                                                                                                  |
| D3ZM20     | Kif13a   | kinesin family member 13A                                               | Ser510 $\downarrow$ [C] ( $\_3$ ), Ser511 $\downarrow$ [C] ( $\_3$ )                                                                                                          |
| A0A1B0GWT8 | Klc1     | kinesin light chain 1                                                   | Ser7 $\downarrow$ [C] ( $\_2$ )                                                                                                                                               |

|            |           |                                                                 |                                                                                                                              |
|------------|-----------|-----------------------------------------------------------------|------------------------------------------------------------------------------------------------------------------------------|
| O08873     | Madd      | MAP-kinase activating death domain                              | Ser828 ↓[C] (1)                                                                                                              |
| P15205     | Map1b     | microtubule-associated protein 1B                               | Ser1305 ↓[C] (1), Ser1368 ↓[C] (2), Ser1369 ↓[C] (2), Ser1371 ↓[C] (1), Ser1772 ↓[C] (3), Ser1775 ↓[C] (3), Thr1781 ↓[C] (3) |
| A0A0G2K3R1 | Map3k4    | mitogen activated protein kinase kinase kinase 4                | Ser59 ↓[C] (3) ↓[C] (2), Ser77 ↓[C] (3) ↓[C] (2)                                                                             |
| D3Z8I4     | Map4k1    | mitogen activated protein kinase kinase kinase kinase 1         | Ser370 ↓[C] (2), Ser373 ↓[C] (2), Ser375 ↓[C] (2), Tyr379 ↓[C] (2)                                                           |
| A0JN25     | Mapt      | microtubule-associated protein tau                              | Ser306 ↓[-38.03] (2)                                                                                                         |
| F1LMW7     | Marcks    | myristoylated alanine rich protein kinase C substrate           | Ser27 ↓[C] (1)                                                                                                               |
| Q4W1H3     | Myo9b     | myosin IXb                                                      | Ser1982 ↓[C] (1)                                                                                                             |
| P35465     | Pak1      | p21 (RAC1) activated kinase 1                                   | Ser174 ↓[-5.65] (1), Ser219 ↓[C] (1), Thr228 ↓[C] (1)                                                                        |
| F1M785     | Pdzd2     | PDZ domain containing 2                                         | Ser788 ↓[-7.58] (2), Thr793 ↓[-7.58] (2), Ser2157 ↓[C] (2), Ser2159 ↓[C] (2)                                                 |
| G3V9D1     | Plcd1     | phospholipase C, delta 1                                        | Ser460 ↑[TRH] (2)                                                                                                            |
| D3ZA21     | Plekhg3   | pleckstrin homology and RhoGEF domain containing G3             | Ser636 ↓[C] (2)                                                                                                              |
| P54645     | Prkaa1    | protein kinase AMP-activated catalytic subunit alpha 1          | Ser486 ↓[-13.17] (2)                                                                                                         |
| A0A0G2K928 | Prkd1     | protein kinase D1                                               | Ser189 ↓[C] (2), Ser192 ↓[C] (2), Ser361 ↓[C] (1), Ser361 ↓[C] (2), Thr364 ↓[C] (2)                                          |
| P70600     | Ptk2b     | protein tyrosine kinase 2 beta                                  | Ser389 ↓[C] (3), Ser392 ↓[C] (3), Ser394 ↓[C] (3), Ser396 ↓[C] (3), Ser399 ↓[C] (3)                                          |
| A0A0G2K1B4 | Rab3ip    | RAB3A interacting protein                                       | Ser272 ↓[C] (1)                                                                                                              |
| A0A0G2JYK2 | Rab11fip1 | RAB11 family interacting protein 1                              | Ser990 ↓[C] (2)                                                                                                              |
| A0A0G2K1W1 | Rab11fip5 | RAB11 family interacting protein 5                              | Ser1058 ↓[C] (2)                                                                                                             |
| D3ZX42     | Rabgap1   | RAB GTPase activating protein 1                                 | Ser988 ↓[C] (2), Thr992 ↓[C] (2)                                                                                             |
| D3ZKH6     | Rabgap11  | RAB GTPase activating protein 1-like                            | Ser128 ↓[C] (1)                                                                                                              |
| D4A1Z8     | Radil     | Rap associating with DIL domain                                 | Ser206 ↓[C] (1)                                                                                                              |
| Q0VGK1     | Ralgps2   | <u>Ral GEF with PH domain and SH3 binding motif 2</u>           | Ser316 ↓[-6.27] (2)                                                                                                          |
| D4A054     | Ranbp2    | RAN binding protein 2                                           | Ser2088 ↑[TRH] (3), Ser2092 ↑[TRH] (3), Ser2096 ↑[TRH] (3), Ser2097 ↑[TRH] (3)                                               |
| D3Z7Z5     | Ranbp10   | RAN binding protein 10                                          | Ser463 ↓[C] (2), Ser467 ↓[C] (2) ↓[C] (3)                                                                                    |
| F1MAA5     | Rangap1   | RAN GTPase activating protein 1                                 | Ser427 ↑[TRH] (2)                                                                                                            |
| D3ZPI4     | Rap1gap2  | RAP1 GTPase activating protein 2                                | Ser361 ↓[C] (2), Ser365 ↓[C] (2)                                                                                             |
| D3ZTL8     | Rapgef6   | Rap guanine nucleotide exchange factor 6                        | Ser1595 ↓[C] (1)                                                                                                             |
| D4ADX8     | Raph1     | Ras association (RalGDS/AF-6) and pleckstrin homology domains 1 | Ser5 ↓[C] (2), Ser17 ↓[C] (2)                                                                                                |
| B1H241     | Ric8a     | RIC8 guanine nucleotide exchange factor A                       | Tyr434 ↓[C] (2), Ser435 ↓[C] (2), Thr440 ↓[C] (2)                                                                            |
| A0A096P6M3 | Rims2     | regulating synaptic membrane exocytosis 2                       | Ser1143 ↓[C] (2), Ser1485 ↓[C] (2), Ser1486 ↓[C] (2)                                                                         |
| D3ZI11     | Rreb1     | ras responsive element binding protein 1                        | Ser1590 ↓[C] (3), Ser1603 ↓[C] (3)                                                                                           |

|            |          |                                                  |                                                                                                                         |
|------------|----------|--------------------------------------------------|-------------------------------------------------------------------------------------------------------------------------|
| G3V7X2     | Scg2     | secretogranin II                                 | Ser491 ↑[TRH] ( _1), Ser494 ↑[TRH] ( _1), Ser495 ↓[-3.50] ( _1)                                                         |
| A0A0G2KAW2 | Sipa1l1  | signal-induced proliferation-associated 1 like 1 | Ser1629 ↑[TRH] ( _3), Ser1690 ↓[C] ( _2)                                                                                |
| B1H267     | Snx5     | sorting nexin 5                                  | Ser20 ↓[C] ( _1), Ser22 ↓[C] ( _1)                                                                                      |
| E9PTN4     | Srpkl    | SRSF protein kinase 1                            | Ser33 ↓[C] ( _3), Ser37 ↓[C] ( _3), Ser39 ↓[C] ( _3), Ser51 ↓[C] ( _3) ↓[C] ( _2), Thr453 ↓[C] ( _2), Ser455 ↓[C] ( _2) |
| G3V8I4     | Stx4     | syntaxin 4                                       | Ser15 ↓[-28.99] ( _1)                                                                                                   |
| A0A0G2K6Y9 | Stx7     | syntaxin 7                                       | Ser196 ↓[C] ( _2), Ser203 ↓[C] ( _2)                                                                                    |
| F1LRL4     | Tbc1d9b  | TBC1 domain family, member 9B                    | Ser1084 ↓[C] ( _1)                                                                                                      |
| Q587K3     | Tbc1d10a | TBC1 domain family, member 10a                   | Ser45 ↓[C] ( _2)                                                                                                        |
| D3ZSY8     | Tbc1d10b | TBC1 domain family, member 10b                   | Ser231 ↑[TRH] ( _2), Ser234 ↑[TRH] ( _2)                                                                                |
| D3ZLW4     | Tsc2     | tuberous sclerosis 2                             | Ser1389 ↓[C] ( _2)                                                                                                      |
| A0A0G2K3A0 | Wnk1     | WNK lysine deficient protein kinase 1            | Ser1809 ↓[C] ( _2)                                                                                                      |
| D3ZMJ7     | Wnk2     | WNK lysine deficient protein kinase 2            | Ser45 ↑[TRH] ( _1), Ser49 ↓[C] ( _1), Ser1830 ↓[C] ( _2), Ser1831 ↓[C] ( _2)                                            |

↑, elevated phosphorylation; ↓, decreased phosphorylation; ↓[C], detected only in control (negative siRNA-treated) cells; ↑[TRH], detected only in cells stimulated with TRH; ( \_1, \_2, \_3), multiplicity

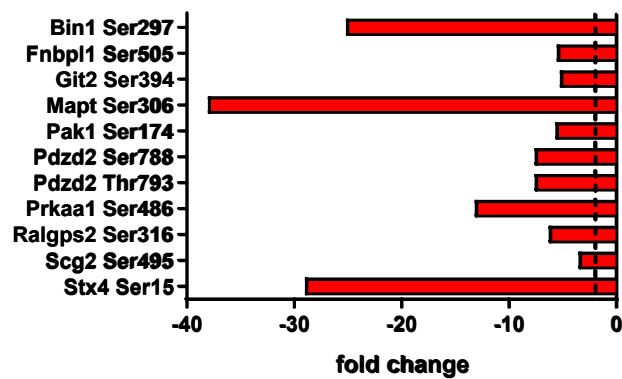

**Figure S4.** Quantitative changes in phosphoproteins involved in the regulation of small GTPase activity in GH1 cells after stimulation with 1  $\mu$ M TRH

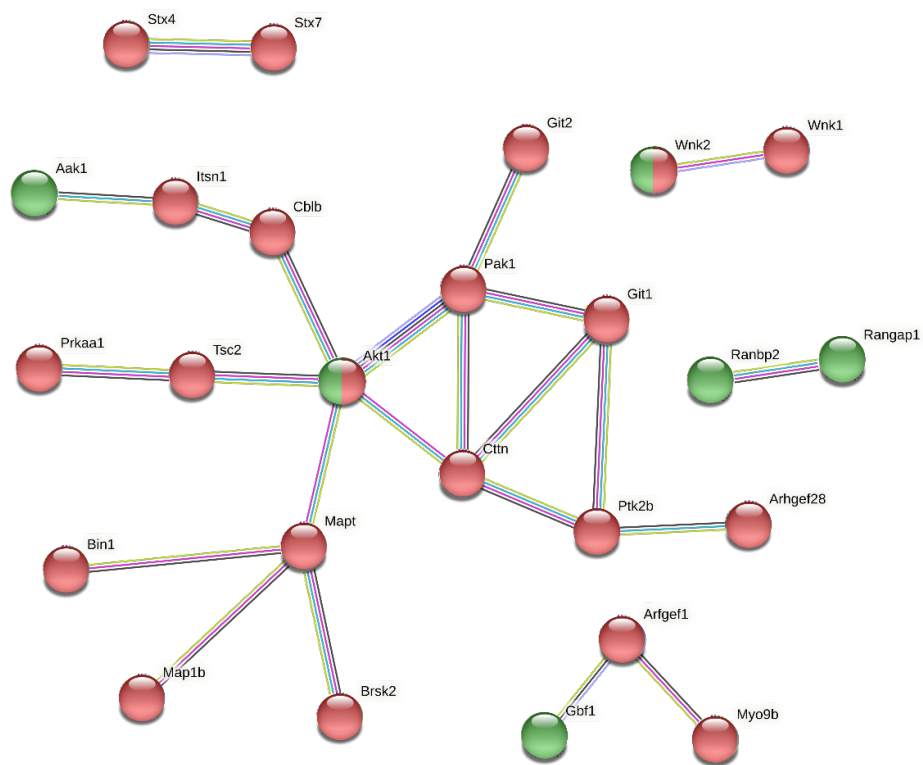

**Figure S5.** A network of differentially phosphorylated proteins involved in the regulation of small GTPase activity in GH1 cells after TRH treatment. Elevated phosphorylation in green, decreased phosphorylation in red.

**Table S3.** A list of differentially phosphorylated proteins related to regulation of small GTPase activity in GH1 cells after stimulation with 1  $\mu$ M TAL

| Uniprot ID | Gene ID  | Gene name                                                    | Phosphorylated regions                                                                                                                                                                                                |
|------------|----------|--------------------------------------------------------------|-----------------------------------------------------------------------------------------------------------------------------------------------------------------------------------------------------------------------|
| O35889     | Afdn     | afadin, adherens junction formation factor                   | Ser1779 $\downarrow$ [-3.44] ( $\_1$ )                                                                                                                                                                                |
| F1M9N7     | Agfg1    | ArfGAP with FG repeats 1                                     | Thr177 $\downarrow$ [-5.60] ( $\_2$ ), Ser181 $\downarrow$ [-4.36] ( $\_2$ )                                                                                                                                          |
| P47196     | Akt1     | AKT serine/threonine kinase 1                                | Ser124 $\downarrow$ [-5.22] ( $\_1$ ), Ser126 $\downarrow$ [-363.47] ( $\_1$ )                                                                                                                                        |
| A0A0G2JWD6 | Ap3v1    | adaptor-related protein complex 3, beta 1 subunit            | Ser276 $\downarrow$ [C] ( $\_1$ )                                                                                                                                                                                     |
| D4A631     | Arfgef1  | ADP ribosylation factor guanine nucleotide exchange factor 1 | Ser286 $\downarrow$ [C] ( $\_1$ ), Ser394 $\downarrow$ [C] ( $\_2$ )                                                                                                                                                  |
| Q7TSU1     | Arfgef2  | ADP ribosylation factor guanine nucleotide exchange factor 2 | Ser218 $\downarrow$ [-9.87] ( $\_2$ ), Ser227 $\downarrow$ [C] ( $\_1$ )                                                                                                                                              |
| A0A0G2JYA2 | Arfip1   | ADP-ribosylation factor interacting protein 1                | Ser5 $\downarrow$ [C] ( $\_1$ )                                                                                                                                                                                       |
| Q6TUE6     | Arhgap5  | Rho GTPase activating protein 5                              | Ser1173 $\downarrow$ [-9.69] ( $\_2$ ), Ser1176 $\downarrow$ [-10.49] ( $\_2$ )                                                                                                                                       |
| D4AAV4     | Arhgap17 | Rho GTPase activating protein 17                             | Ser574 $\downarrow$ [-3.23] ( $\_1$ ), Thr748 $\downarrow$ [-6.45] ( $\_2$ ), Ser751 $\downarrow$ [-6.45] ( $\_2$ ), Thr752 $\downarrow$ [-6.45] ( $\_2$ )                                                            |
| D4AD82     | Arhgap35 | Rho GTPase activating protein 35                             | Ser975 $\downarrow$ [C] ( $\_1$ ), Ser1174 $\downarrow$ [C] ( $\_2$ ), Ser1179 $\downarrow$ [C] ( $\_2$ )                                                                                                             |
| A0A1B0GWY5 | Arhgef2  | Rho/Rac guanine nucleotide exchange factor 2                 | Ser925 $\downarrow$ [C] ( $\_2$ ), Ser937 $\downarrow$ [-8.00] ( $\_2$ ), Ser940 $\downarrow$ [-6.21] ( $\_2$ )                                                                                                       |
| A0A0G2JZC6 | Arhgef11 | Rho guanine nucleotide exchange factor 11                    | Ser308 $\downarrow$ [C] ( $\_3$ )                                                                                                                                                                                     |
| D3ZYR0     | Arhgef12 | Rho guanine nucleotide exchange factor 12                    | Ser341 $\downarrow$ [-4.73] ( $\_1$ )                                                                                                                                                                                 |
| P0C6P5     | Arhgef28 | Rho guanine nucleotide exchange factor 28                    | Ser314 $\downarrow$ [C] ( $\_1$ ), Thr1197 $\downarrow$ [C] ( $\_2$ ), Ser1198 $\downarrow$ [C] ( $\_2$ ), Ser1200 $\downarrow$ [C] ( $\_2$ )                                                                         |
| Q4V8I5     | Arl6ip4  | ADP-ribosylation factor like GTPase 6 interacting protein 4  | Ser142 $\downarrow$ [C] ( $\_1$ )                                                                                                                                                                                     |
| A0A0G2K451 | Asap1    | ArfGAP with SH3 domain, ankyrin repeat and PH domain 1       | Ser647 $\downarrow$ [-6.25] ( $\_2$ ), Ser651 $\downarrow$ [-6.25] ( $\_2$ )                                                                                                                                          |
| A0A0G2K808 | Asap2    | ArfGAP with SH3 domain, ankyrin repeat and PH domain 2       | Ser653 $\downarrow$ [-5.78] ( $\_1$ )                                                                                                                                                                                 |
| F1LMX1     | Bin1     | bridging integrator 1                                        | Ser297 $\downarrow$ [-7.05] ( $\_1$ ), Ser305 $\downarrow$ [-5.74] ( $\_2$ ), Ser325 $\downarrow$ [-8.53] ( $\_2$ ), Ser333 $\downarrow$ [-8.53] ( $\_2$ )                                                            |
| D3ZML2     | Brsk2    | BR serine/threonine kinase 2                                 | Ser424 $\downarrow$ [C] ( $\_2$ ), Ser428 $\downarrow$ [C] ( $\_3$ ) $\downarrow$ [C] ( $\_2$ ), Ser436 $\downarrow$ [C] ( $\_3$ )                                                                                    |
| Q8K4S7     | Cblb     | Cbl proto-oncogene B                                         | Ser476 $\downarrow$ [C] ( $\_3$ ), Ser480 $\downarrow$ [C] ( $\_3$ ), Ser483 $\downarrow$ [C] ( $\_3$ ), Ser484 $\downarrow$ [-11.87] ( $\_2$ )                                                                       |
| Q7TT49     | Cdc42bpb | CDC42 binding protein kinase beta                            | Ser1692 $\downarrow$ [-31.75] ( $\_1$ ), Ser1695 $\downarrow$ [-17.53] ( $\_2$ )                                                                                                                                      |
| A0A1B0GWS4 | Ctnn     | cortactin                                                    | Tyr139 $\downarrow$ [C] ( $\_2$ )                                                                                                                                                                                     |
| A0A0G2KB92 | Dclk1    | doublecortin-like kinase 1                                   | Ser330 $\downarrow$ [-12.50] ( $\_2$ ), Ser334 $\downarrow$ [C] ( $\_3$ ), Ser337 $\downarrow$ [C] ( $\_2$ ), Ser340 $\downarrow$ [C] ( $\_3$ ), Ser363 $\downarrow$ [C] ( $\_2$ ), Ser364 $\downarrow$ [C] ( $\_2$ ) |
| F1M241     | Dennd1a  | DENN domain containing 1A                                    | Ser521 $\downarrow$ [C] ( $\_2$ )                                                                                                                                                                                     |
| F1LTD7     | Dennd4c  | DENN domain containing 4C                                    | Ser1310 $\downarrow$ [C] ( $\_2$ ), Ser1323 $\downarrow$ [-5.85] ( $\_2$ ), Ser1336 $\downarrow$ [-5.85] ( $\_2$ )                                                                                                    |
| A0A0G2KAH4 | Dock6    | dedicator of cytokinesis 6                                   | Ser1260 $\uparrow$ [TAL] ( $\_1$ )                                                                                                                                                                                    |
| F1LRS2     | Dock7    | dedicator of cytokinesis 7                                   | Ser904 $\downarrow$ [-5.08] ( $\_2$ ), Ser906 $\downarrow$ [-5.08] ( $\_2$ )                                                                                                                                          |
| D3ZB71     | Dvl2     | dishevelled segment polarity protein 2                       | Ser211 $\downarrow$ [-8.27] ( $\_1$ )                                                                                                                                                                                 |



|            |         |                                                                  |                                                                                                                            |
|------------|---------|------------------------------------------------------------------|----------------------------------------------------------------------------------------------------------------------------|
| D4ADV8     | Dvl3    | dishevelled segment polarity protein 3                           | Ser125 ↓[-3.22] ( _1)                                                                                                      |
| Q64350     | Eif2b5  | eukaryotic translation initiation factor 2B subunit 5 epsilon    | Ser539 ↓[C] ( _1)                                                                                                          |
| Q07205     | Eif5    | eukaryotic translation initiation factor 5                       | Ser387 ↓[-5.56] ( _2), Ser388 ↓[-5.56] ( _2)                                                                               |
| M0R4L1     | ErbB2   | erb-b2 receptor tyrosine kinase 2                                | Thr152 ↓[-5.36] ( _2), Ser154 ↓[-5.36] ( _2)                                                                               |
| F1LYQ8     | Farp1   | FERM, ARH/RhoGEF and pleckstrin domain protein 1                 | Ser893 ↓[C] ( _2), Thr902 ↓[-14.79] ( _2) ↓[-6.76] ( _3)                                                                   |
| D3ZFK8     | Farp2   | FERM, ARH/RhoGEF and pleckstrin domain protein 2                 | Ser474 ↓[C] ( _3), Ser477 ↓[C] ( _3) ↓[C] ( _2)                                                                            |
| Q2HWF0     | Fnbp11  | formin binding protein 1-like                                    | Ser501 ↓[C] ( _2) ↓[C] ( _1), Ser505 ↓[C] ( _2)                                                                            |
| A0A0G2K3N1 | Gbf1    | golgi brefeldin A resistant guanine nucleotide exchange factor 1 | Ser345 ↓[-4.26] ( _2), Ser1291 ↓[C] ( _1)                                                                                  |
| A0A0G2K527 | Git1    | GIT ArfGAP 1                                                     | Ser379 ↑[TAL] ( _2)                                                                                                        |
| Q66H91     | Git2    | GIT ArfGAP 2                                                     | Ser394 ↓[-2.92] ( _2), Ser397 ↓[-3.83] ( _1)                                                                               |
| A0A0G2JSH4 | Gsk3b   | glycogen synthase kinase 3 beta                                  | Ser389 ↓[-3.03] ( _1)                                                                                                      |
| D2XV59     | Gtpbp1  | GTP binding protein 1                                            | Ser8 ↓[-4.55] ( _2), Ser12 ↓[-2.06] ( _3), Ser24 ↓[-2.50] ( _3), Ser25 ↓[-4.55] ( _2), Ser580 ↓[-61.26] ( _1)              |
| Q9WVE9     | Itsn1   | intersectin 1                                                    | Ser894 ↓[C] ( _1)                                                                                                          |
| M0R7A6     | Itsn2   | intersectin 2                                                    | Ser908 ↓[-2.95] ( _1)                                                                                                      |
| A0A1B0GWT8 | Klc1    | kinesin light chain 1                                            | Ser7 ↓[C] ( _2)                                                                                                            |
| M0RBD3     | Ksr2    | kinase suppressor of ras 2                                       | Thr276 ↓[-3.07] ( _2)                                                                                                      |
| G3V6I1     | Lgl1    | LLGL1, scribble cell polarity complex component                  | Ser997 ↓[C] ( _2)                                                                                                          |
| D3ZBH5     | Lmtk2   | lemur tyrosine kinase 2                                          | Ser496 ↓[C] ( _2), Ser580 ↓[C] ( _2), Ser1334 ↑[TAL] ( _3)                                                                 |
| O08873     | Madd    | MAP-kinase activating death domain                               | Ser828 ↓[C] ( _1)                                                                                                          |
| P15205     | Map1b   | microtubule-associated protein 1B                                | Ser1305 ↓[C] ( _1), Ser1368 ↓[C] ( _2), Ser1369 ↓[C] ( _2), Ser1371 ↓[-4.48] ( _1), Ser1772 ↓[C] ( _3), Ser1775 ↓[C] ( _3) |
| A0A0G2K3R1 | Map3k4  | mitogen activated protein kinase kinase kinase 4                 | Ser59 ↓[C] ( _3), Ser59 ↓[-11.89] ( _2), Ser77 ↓[-11.89] ( _2), Ser77 ↓[C] ( _3)                                           |
| Q810W7     | Mast1   | microtubule associated serine/threonine kinase 1                 | Ser346 ↓[-2.01] ( _1)                                                                                                      |
| D3ZL30     | Mast3   | microtubule associated serine/threonine kinase 3                 | Ser354 ↓[C] ( _1)                                                                                                          |
| Q4W1H3     | Myo9b   | myosin IXb                                                       | Ser1250 ↓[-5.20] ( _2), Ser1252 ↓[-5.20] ( _2), Ser1982 ↓[C] ( _1)                                                         |
| P35465     | Pak1    | p21 (RAC1) activated kinase 1                                    | Ser219 ↓[-2.29] ( _1)                                                                                                      |
| F1M785     | Pdzd2   | PDZ domain containing 2                                          | Ser788 ↓[C] ( _2), Thr793 ↓[C] ( _2), Ser2157 ↓[C] ( _2), Ser2159 ↓[C] ( _2)                                               |
| D3ZXY2     | Pdzd8   | PDZ domain containing 8                                          | Ser495 ↓[-6.04] ( _1), Thr972 ↓[-13.07] ( _2), Ser978 ↓[-13.07] ( _2)                                                      |
| D3ZYT8     | Pikfyve | phosphoinositide kinase, FYVE-type zinc finger containing        | Ser341 ↓[-4.02] ( _1), Ser487 ↓[-5.75] ( _1), Thr489 ↓[-9.17] ( _1)                                                        |
| F1M2K6     | Pkp4    | plakophilin 4                                                    | Ser220 ↓[-7.30] ( _2), Ser230 ↓[-7.30] ( _2)                                                                               |
| G3V9D1     | Plcd1   | phospholipase C, delta 1                                         | Ser454 ↑[TAL] ( _2), Ser460 ↑[TAL] ( _2)                                                                                   |
| A0A0G2K4N6 | Plcl1   | phospholipase C-like 1                                           | Thr458 ↓[C] ( _1)                                                                                                          |
| D3ZA21     | Plekhg3 | pleckstrin homology and RhoGEF domain containing G3              | Ser636 ↓[C] ( _2)                                                                                                          |
| Q6J4I0     | Ppp1r1b | protein phosphatase 1, regulatory (inhibitor) subunit 1B         | Ser102 ↓[-4.19] ( _1)                                                                                                      |

|            |           |                                                                 |                                                                                                                                                |
|------------|-----------|-----------------------------------------------------------------|------------------------------------------------------------------------------------------------------------------------------------------------|
| P54645     | Prkaa1    | protein kinase AMP-activated catalytic subunit alpha 1          | Ser486 ↓[-6.03] ( _2)                                                                                                                          |
| A0A0G2K928 | Prkd1     | protein kinase D1                                               | Ser161 ↓[-4.59] ( _2), Ser164 ↓[-4.59] ( _2), Ser189 ↓[C] ( _2), Ser192 ↓[C] ( _2), Ser361 ↓[C] ( _1)                                          |
| D4A404     | Psd3      | pleckstrin and Sec7 domain containing 3                         | Ser490 ↓[-6.45] ( _2)                                                                                                                          |
| P70600     | Ptk2b     | protein tyrosine kinase 2 beta                                  | Ser389 ↓[C] ( _3), Ser392 ↓[C] ( _3), Ser394 ↓[C] ( _3), Ser396 ↓[C] ( _3), Ser399 ↓[C] ( _3)                                                  |
| A0A0G2K1B4 | Rab3ip    | RAB3A interacting protein                                       | Ser272 ↓[C] ( _1)                                                                                                                              |
| A0A0G2JYK2 | Rab11fip1 | RAB11 family interacting protein 1                              | Ser990 ↓[C] ( _2)                                                                                                                              |
| A0A0G2K1W1 | Rab11fip5 | RAB11 family interacting protein 5                              | Ser825 ↓[-14.04] ( _1), Ser1058 ↓[C] ( _2)                                                                                                     |
| G3V9J7     | Rabep1    | rabaptin, RAB GTPase binding effector protein 1                 | Ser407 ↓[C] ( _1)                                                                                                                              |
| Q5EBC7     | Rabep2    | rabaptin, RAB GTPase binding effector protein 2                 | Ser176 ↓[-3.38] ( _2), Ser180 ↓[-3.38] ( _2)                                                                                                   |
| D3ZX42     | Rabgap1   | RAB GTPase activating protein 1                                 | Ser988 ↓[-7.56] ( _2), Thr992 ↓[-7.56] ( _2)                                                                                                   |
| D3ZKH6     | Rabgap11  | RAB GTPase activating protein 1-like                            | Ser128 ↓[-10.66] ( _1) ↓[-5.17] ( _2)                                                                                                          |
| D4A1Z8     | Radil     | Rap associating with DIL domain                                 | Ser206 ↓[C] ( _1)                                                                                                                              |
| Q5FVT1     | Ralbp1    | ralA binding protein 1                                          | Ser48 ↓[-2.59] ( _2), Ser62 ↓[-2.59] ( _2)                                                                                                     |
| D3ZKI6     | Ralgapa2  | Ral GTPase activating protein catalytic alpha subunit 2         | Ser817 ↓[C] ( _2), Ser818 ↓[C] ( _2)                                                                                                           |
| Q0VGK1     | Ralgps2   | Ral GEF with PH domain and SH3 binding motif 2                  | Ser296 ↓[-2.97] ( _2), Ser308 ↓[-2.97] ( _2), Ser316 ↓[-3.60] ( _2)                                                                            |
| D4A054     | Ranbp2    | RAN binding protein 2                                           | Ser2092 ↓[C] ( _2), Ser2097 ↓[C] ( _2)                                                                                                         |
| D3Z7Z5     | Ranbp10   | RAN binding protein 10                                          | Ser467 ↓[-45.41] ( _3)                                                                                                                         |
| F1M8L9     | Rapgef1   | Rap guanine nucleotide exchange factor 1                        | Ser239 ↓[C] ( _2)                                                                                                                              |
| D4ADX8     | Raph1     | Ras association (RalGDS/AF-6) and pleckstrin homology domains 1 | Ser5 ↓[C] ( _2), Ser17 ↓[C] ( _2)                                                                                                              |
| P33568     | Rb1       | RB transcriptional corepressor 1                                | Ser30 ↓[-3.97] ( _1)                                                                                                                           |
| D3ZL11     | Rbsn      | rabenosyn, RAB effector                                         | Ser216 ↑[TAL] ( _2), Ser218 ↓[-23.64] ( _2)                                                                                                    |
| B1H241     | Ric8a     | RIC8 guanine nucleotide exchange factor A                       | Tyr434 ↓[-7.35] ( _2), Ser435 ↓[-13.23] ( _2), Thr440 ↓[-13.23] ( _2)                                                                          |
| A0A096P6M3 | Rims2     | regulating synaptic membrane exocytosis 2                       | Ser1485 ↓[-6.98] ( _2), Ser1486 ↓[-6.36] ( _2)                                                                                                 |
| D3ZI11     | Rreb1     | ras responsive element binding protein 1                        | Ser1590 ↑[TAL] ( _2) ↓[C] ( _3), Ser1603 ↓[C] ( _3)                                                                                            |
| G3V7X2     | Scg2      | secretogranin II                                                | Ser495 ↓[-4.13] ( _1)                                                                                                                          |
| D3ZWS0     | Scrib     | scribbled planar cell polarity protein                          | Ser1483 ↓[C] ( _1)                                                                                                                             |
| B2RZD1     | Sec61b    | sec61 translocon beta subunit                                   | Ser14 ↑[TAL] ( _1) ↓[C] ( _2), Ser17 ↓[C] ( _1)                                                                                                |
| D4A3T0     | Sos1      | SOS Ras/Rac guanine nucleotide exchange factor 1                | Ser1078 ↓[-5.61] ( _2), Ser1082 ↓[-5.61] ( _2)                                                                                                 |
| D3ZEX7     | Spire1    | spire-type actin nucleation factor 1                            | Ser399 ↓[-2.19] ( _3), Ser400 ↓[-2.19] ( _3), Ser402 ↓[-2.19] ( _3)                                                                            |
| D4A208     | Srgap2    | SLIT-ROBO Rho GTPase activating protein 2                       | Ser990 ↓[C] ( _2)                                                                                                                              |
| E9PTN4     | Srpkl     | SRSF protein kinase 1                                           | Ser33 ↓[-10.08] ( _3), Ser37 ↓[-10.08] ( _3), Ser39 ↓[-7.44] ( _3), Ser51 ↓[-4.50] ( _2) ↓[-10.08] ( _3), Thr453 ↓[C] ( _2), Ser455 ↓[C] ( _2) |
| B1WBQ5     | Stk3      | serine/threonine kinase 3                                       | Ser316 ↓[-13.41] ( _1)                                                                                                                         |
| G3V8I4     | Stx4      | syntaxin 4                                                      | Ser15 ↓[-17.77] ( _1)                                                                                                                          |
| A0A0G2K6Y9 | Stx7      | syntaxin 7                                                      | Ser196 ↓[C] ( _2), Ser203 ↓[C] ( _2)                                                                                                           |

|            |          |                                           |                                                                                            |
|------------|----------|-------------------------------------------|--------------------------------------------------------------------------------------------|
| FILRL4     | Tbc1d9b  | TBC1 domain family member 9B              | Ser1084 ↓[C] ( _1)                                                                         |
| Q587K3     | Tbc1d10a | TBC1 domain family, member 10a            | Ser45 ↓[C] ( _2)                                                                           |
| D3ZSY8     | Tbc1d10b | TBC1 domain family, member 10b            | Ser128 ↓[C] ( _3), Thr135 ↓[C] ( _3),<br>Ser231 ↑[TAL] ( _2), Ser234 ↑[TAL] ( _2)          |
| D3ZZQ0     | Tnik     | TRAF2 and NCK interacting kinase          | Ser640 ↓[-10.91] ( _1), Ser764 ↓[-5.33] ( _2), Ser769 ↓[-5.33] ( _2)                       |
| F1LN91     | Tns3     | tensin 3                                  | Ser891 ↓[-5.14] ( _1)                                                                      |
| O08629     | Trim28   | tripartite motif-containing 28            | Ser31 ↓[-5.71] ( _1), Ser474 ↓[C] ( _1),<br>Ser595 ↓[-53.08] ( _3), Ser597 ↓[-28.00] ( _3) |
| D3ZMG0     | Ulk1     | unc-51 like autophagy activating kinase 1 | Ser450 ↓[-5.76] ( _1)                                                                      |
| A0A0G2K9N2 | Vav2     | vav guanine nucleotide exchange factor 2  | Ser703 ↓[C] ( _2), Ser704 ↓[C] ( _2),<br>Ser706 ↓[C] ( _2)                                 |
| A0A0G2K3A0 | Wnk1     | WNK lysine deficient protein kinase 1     | Ser1809 ↓[C] ( _2)                                                                         |
| D3ZMJ7     | Wnk2     | WNK lysine deficient protein kinase 2     | Ser49 ↓[C] ( _1)                                                                           |

↑, elevated phosphorylation; ↓, decreased phosphorylation; ↓[C], detected only in control (negative siRNA-treated) cells; ↑[TAL], detected only in cells stimulated with TAL; ( \_1, \_2, \_3), multiplicity

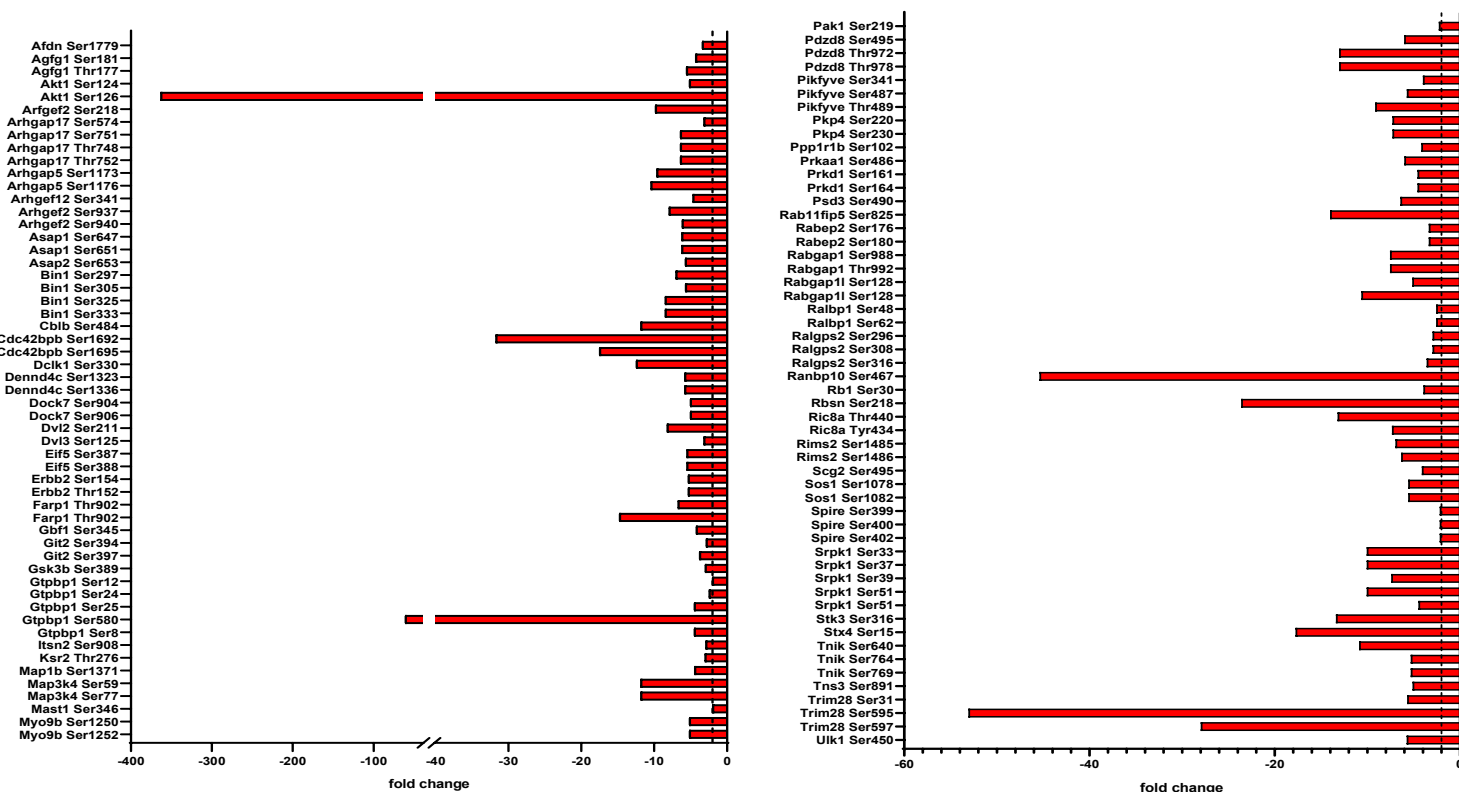

**Figure S6.** Quantitative changes in phosphoproteins involved in the regulation of small GTPase activity in GH1 cells after stimulation with 1 μM TAL.

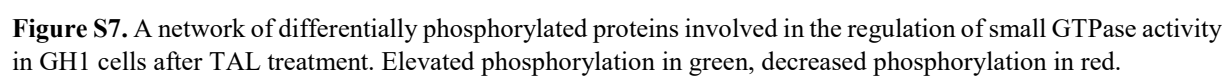

**Figure S7.** A network of differentially phosphorylated proteins involved in the regulation of small GTPase activity in GH1 cells after TAL treatment. Elevated phosphorylation in green, decreased phosphorylation in red.

**Table S4.** A list of differentially phosphorylated proteins involved in the regulation of small GTPase activity in GH1 cells after siRNA-mediated  $\beta$ -arrestin2 knockdown and stimulation with 1  $\mu$ M TRH

| Uniprot ID | Gene ID  | Gene name                                                        | Phosphorylated regions                                                                                                                                                                                                                         |
|------------|----------|------------------------------------------------------------------|------------------------------------------------------------------------------------------------------------------------------------------------------------------------------------------------------------------------------------------------|
| F1M3G7     | Akap13   | A-kinase anchoring protein 13                                    | Ser2676 $\uparrow$ [TRH] ( $\_2$ )                                                                                                                                                                                                             |
| P47196     | Akt1     | AKT serine/threonine kinase 1                                    | Ser124 $\downarrow$ [AR] ( $\_2$ ), Ser126 $\downarrow$ [AR] ( $\_1$ )                                                                                                                                                                         |
| Q63484     | Akt3     | AKT serine/threonine kinase 3                                    | Ser2 $\downarrow$ [AR] ( $\_2$ ), Thr5 $\downarrow$ [AR] ( $\_2$ )                                                                                                                                                                             |
| F1LM60     | Arap1    | ArfGAP with RhoGAP domain, ankyrin repeat and PH domain 1        | Tyr235 $\uparrow$ [TRH] ( $\_1$ )                                                                                                                                                                                                              |
| D4A631     | Arfgef1  | ADP ribosylation factor guanine nucleotide exchange factor 1     | Ser286 $\downarrow$ [AR] ( $\_1$ ), Ser1566 $\uparrow$ [TRH] ( $\_1$ )                                                                                                                                                                         |
| D3ZF86     | Arfgef3  | ARFGEF family member 3                                           | Ser387 $\downarrow$ [AR] ( $\_2$ )                                                                                                                                                                                                             |
| A0A0G2JYA2 | Arfip1   | ADP-ribosylation factor interacting protein 1                    | Ser5 $\downarrow$ [AR] ( $\_1$ ), Ser9 $\downarrow$ [AR] ( $\_1$ )                                                                                                                                                                             |
| D4AAV4     | Arhgap17 | Rho GTPase activating protein 17                                 | Ser574 $\downarrow$ [AR] ( $\_1$ ), Thr752 $\uparrow$ [TRH] ( $\_2$ )                                                                                                                                                                          |
| F1MAK3     | Arhgap32 | Rho GTPase activating protein 32                                 | Ser720 $\uparrow$ [TRH] ( $\_1$ ), Ser865 $\uparrow$ [TRH] ( $\_2$ ), Ser870 $\uparrow$ [TRH] ( $\_2$ ), Ser885 $\downarrow$ [AR] ( $\_1$ )                                                                                                    |
| D4AD82     | Arhgap35 | Rho GTPase activating protein 35                                 | Ser773 $\downarrow$ [AR] ( $\_2$ ), Ser985 $\downarrow$ [AR] ( $\_2$ ), Ser1127 $\downarrow$ [AR] ( $\_2$ )                                                                                                                                    |
| A0A0G2QC21 | Arhgef7  | Rho guanine nucleotide exchange factor 7                         | Thr159 $\uparrow$ [TRH] ( $\_1$ )                                                                                                                                                                                                              |
| A0A0G2JZC6 | Arhgef11 | Rho guanine nucleotide exchange factor 11                        | Ser270 $\uparrow$ [TRH] ( $\_2$ ), Ser273 $\uparrow$ [TRH] ( $\_2$ ), Thr311 $\uparrow$ [TRH] ( $\_2$ )                                                                                                                                        |
| P0C6P5     | Arhgef28 | Rho guanine nucleotide exchange factor 28                        | Thr1197 $\downarrow$ [AR] ( $\_2$ ), Ser1198 $\downarrow$ [AR] ( $\_2$ ), Ser1200 $\downarrow$ [AR] ( $\_2$ )                                                                                                                                  |
| A0A0G2K451 | Asap1    | ArfGAP with SH3 domain, ankyrin repeat and PH domain 1           | Ser855 $\uparrow$ [TRH] ( $\_1$ )                                                                                                                                                                                                              |
| O70239     | Axin1    | axin 1                                                           | Ser75 $\uparrow$ [TRH] ( $\_2$ ), Thr79 $\uparrow$ [TRH] ( $\_2$ )                                                                                                                                                                             |
| F1LMX1     | Bin1     | bridging integrator 1                                            | Ser333 $\downarrow$ [AR] ( $\_1$ )                                                                                                                                                                                                             |
| Q8K4S7     | Cblb     | Cbl proto-oncogene B                                             | Ser476 $\uparrow$ [TRH] ( $\_3$ ), Ser480 $\uparrow$ [TRH] ( $\_3$ ), Ser484 $\uparrow$ [TRH] ( $\_3$ )                                                                                                                                        |
| B1WC33     | Cdc42ep4 | CDC42 effector protein 4                                         | Ser116 $\uparrow$ [TRH] ( $\_1$ )                                                                                                                                                                                                              |
| Q63768     | Crk      | CRK proto-oncogene, adaptor protein                              | Ser41 $\uparrow$ [TRH] ( $\_1$ )                                                                                                                                                                                                               |
| A0A1B0GWS4 | Cttn     | Cortactin                                                        | Tyr139 $\uparrow$ [TRH] ( $\_2$ )                                                                                                                                                                                                              |
| A0A0G2KB92 | Dclk1    | doublecortin-like kinase 1                                       | Ser334 $\downarrow$ [AR] ( $\_3$ ), Ser340 $\uparrow$ [TRH] ( $\_1$ ) $\downarrow$ [AR] ( $\_3$ )                                                                                                                                              |
| A0A0G2KAH4 | Dock6    | dedicator of cytokinesis 6                                       | Ser884 $\uparrow$ [TRH] ( $\_1$ ), Ser1260 $\uparrow$ [TRH] ( $\_1$ )                                                                                                                                                                          |
| F1LRS2     | Dock7    | dedicator of cytokinesis 7                                       | Ser904 $\downarrow$ [AR] ( $\_3$ ), Ser908 $\downarrow$ [AR] ( $\_3$ ), Ser918 $\downarrow$ [AR] ( $\_3$ ), Ser1408 $\downarrow$ [AR] ( $\_1$ ), Ser1410 $\uparrow$ [TRH] ( $\_1$ ), Ser1416 $\downarrow$ [AR] ( $\_1$ )                       |
| B5DFE2     | Ezh2     | enhancer of zeste 2 polycomb repressive complex 2 subunit        | Ser362 $\downarrow$ [AR] ( $\_2$ )                                                                                                                                                                                                             |
| F1LYQ8     | Farp1    | FERM, ARH/RhoGEF and pleckstrin domain protein 1                 | Thr371 $\downarrow$ [AR] ( $\_2$ ), Ser373 $\downarrow$ [AR] ( $\_2$ ), Ser376 $\uparrow$ [TRH] ( $\_2$ ), Ser898 $\uparrow$ [TRH] ( $\_3$ ), Ser900 $\uparrow$ [TRH] ( $\_2$ ), Thr902 $\uparrow$ [TRH] ( $\_3$ ) $\downarrow$ [AR] ( $\_2$ ) |
| D3ZFK8     | Farp2    | FERM, ARH/RhoGEF and pleckstrin domain protein 2                 | Ser474 $\downarrow$ [AR] ( $\_2$ )                                                                                                                                                                                                             |
| Q2HWF0     | Fnbp11   | formin binding protein 1-like                                    | Ser488 $\uparrow$ [TRH] ( $\_2$ ), Ser501 $\uparrow$ [TRH] ( $\_1$ )                                                                                                                                                                           |
| D4A022     | Gapvd1   | GTPase activating protein and VPS9 domains 1                     | Ser971 $\downarrow$ [AR] ( $\_2$ )                                                                                                                                                                                                             |
| A0A0G2K3N1 | Gbfl     | golgi brefeldin A resistant guanine nucleotide exchange factor 1 | Ser340 $\downarrow$ [AR] ( $\_2$ ), Ser1293 $\downarrow$ [AR] ( $\_1$ )                                                                                                                                                                        |

|            |           |                                                                               |                                                                                         |
|------------|-----------|-------------------------------------------------------------------------------|-----------------------------------------------------------------------------------------|
| A0A0G2K527 | Git1      | GIT ArfGAP 1                                                                  | Ser379 ↓[AR] (2), Thr383 ↓[AR] (2)                                                      |
| A0A0G2JSH4 | Gsk3b     | glycogen synthase kinase 3 beta                                               | Ser389 ↓[AR] (1)                                                                        |
| D2XV59     | Gtpbp1    | GTP binding protein 1                                                         | Ser24 ↓[AR] (3)                                                                         |
| Q9WVE9     | Itsn1     | intersectin 1                                                                 | Ser896 ↓[AR] (1)                                                                        |
| D3ZM20     | Kif13a    | kinesin family member 13A                                                     | Ser510 ↓[AR] (3), Ser511 ↓[AR] (3)                                                      |
| Q6P791     | Lamtor1   | late endosomal/lysosomal adaptor, MAPK and MTOR activator 1                   | Ser26 ↓[AR] (1)                                                                         |
| O08873     | Madd      | MAP-kinase activating death domain                                            | Ser1196 ↑[TRH] (1)                                                                      |
| P15205     | Map1b     | microtubule-associated protein 1B                                             | Ser1305 ↑[TRH] (1)                                                                      |
| A0A0G2K3R1 | Map3k4    | mitogen activated protein kinase kinase kinase 4                              | Ser59 ↓[AR] (2)                                                                         |
| A0JN25     | Mapt      | microtubule associated protein tau                                            | Ser306 ↑[TRH] (2)                                                                       |
| A0A0G2K6X6 | Mark2     | microtubule affinity regulating kinase 2                                      | Ser567 ↑[TRH] (1)                                                                       |
| Q810W7     | Mast1     | microtubule associated serine/threonine kinase 1                              | Ser346 ↓[AR] (1)                                                                        |
| Q63406     | Mcf2l     | MCF.2 cell line derived transforming sequence-like multiple PDZ domain crumbs | Ser966 ↓[AR] (2), Thr978 ↓[AR] (2)                                                      |
| A0A0G2K2Y8 | Mpdz      | cell polarity complex component                                               | Ser1819 ↓[AR] (3)                                                                       |
| P35465     | Pak1      | p21 (RAC1) activated kinase 1                                                 | Thr184 ↓[AR] (1), Ser222 ↓[AR] (1)                                                      |
| F1M785     | Pdzd2     | PDZ domain containing 2                                                       | Ser887 ↑[TRH] (2), Ser891 ↑[TRH] (2), Ser2157 ↓[AR] (2), Ser2159 ↓[AR] (2)              |
| D3ZYT8     | Pikfyve   | phosphoinositide kinase, FYVE-type zinc finger containing                     | Ser341 ↓[AR] (1), Ser487 ↓[AR] (2), Thr489 ↓[AR] (2)                                    |
| Q63433     | Pkn1      | protein kinase N1                                                             | Ser920 ↑[TRH] (1)                                                                       |
| Q45QJ4     | Plcb3     | phospholipase C beta 3                                                        | Ser537 ↑[2.00] (1)                                                                      |
| D3ZCI6     | Plcb4     | phospholipase C, beta 4                                                       | Thr886 ↑[TRH] (3)                                                                       |
| D3ZW14     | Prex2     | phosphatidylinositol-3,4,5-trisphosphate-dependent Rac exchange factor 2      | Ser826 ↑[TRH] (1)                                                                       |
| A0A0G2K5Q0 | Prkcb     | protein kinase C, beta                                                        | Ser643 ↑[TRH] (2)                                                                       |
| F1LMV8     | Prkce     | protein kinase C, epsilon                                                     | Ser140 ↑[TRH] (2)                                                                       |
| A0A0G2K928 | Prkd1     | protein kinase D1                                                             | Ser361 ↑[TRH] (2), Thr364 ↑[TRH] (2)                                                    |
| P97887     | Psen1     | presenilin 1                                                                  | Ser366 ↑[TRH] (2)                                                                       |
| A0A0G2JYK2 | Rab11fip1 | RAB11 family interacting protein 1                                            | Ser990 ↑[TRH] (2)                                                                       |
| D3ZKH6     | Rabgap1l  | RAB GTPase activating protein 1-like                                          | Ser128 ↓[AR] (1)                                                                        |
| Q5FVT1     | Ralbp1    | ralA binding protein 1                                                        | Ser30 ↓[AR] (2), Ser34 ↑[TRH] (2), Ser92 ↑[TRH] (3), Ser93 ↑[TRH] (3), Ser99 ↑[TRH] (3) |
| A0A0G2KA57 | Ralgapb   | Ral GTPase activating protein non-catalytic beta subunit                      | Thr313 ↓[AR] (1)                                                                        |
| Q0VGK1     | Ralgps2   | Ral GEF with PH domain and SH3 binding motif 2                                | Ser293 ↓[AR] (1), Ser316 ↓[AR] (2)                                                      |
| D4A2G9     | Ranbp1    | RAN binding protein 1                                                         | Ser21 ↓[AR] (1)                                                                         |
| D4A054     | Ranbp2    | RAN binding protein 2                                                         | Ser1154 ↓[AR] (1), Ser2092 ↑[TRH] (3), Ser2096 ↑[TRH] (3)                               |
| M0R920     | Ranbp3    | RAN binding protein 3                                                         | Ser27 ↑[TRH] (3), Ser30 ↑[TRH] (3), Ser31 ↑[2.92] (2) ↑[TRH] (3), Ser409 ↓[AR] (2)      |
| F1LVV3     | Ranbp9    | RAN binding protein 9                                                         | Ser459 ↓[AR] (1)                                                                        |

|            |          |                                                  |                                                                                       |
|------------|----------|--------------------------------------------------|---------------------------------------------------------------------------------------|
| D3Z7Z5     | Ranbp10  | RAN binding protein 10                           | Ser463 ↑[TRH] ( _3)                                                                   |
| F1MAA5     | Rangap1  | RAN GTPase activating protein 1                  | Ser427 ↑[TRH] ( _2)                                                                   |
| D3ZPI4     | Rap1gap2 | RAP1 GTPase activating protein 2                 | Ser361 ↑[TRH] ( _2)                                                                   |
| D3ZTL8     | Rapgef6  | Rap guanine nucleotide exchange factor 6         | Ser1595 ↑[TRH] ( _1)                                                                  |
| P33568     | Rb1      | RB transcriptional corepressor 1                 | Thr363 ↓[AR] ( _2), Thr396 ↓[AR] ( _2), Ser600 ↓[AR] ( _2), Ser604 ↓[AR] ( _2)        |
| D3ZL11     | Rbsn     | rabenosyn, RAB effector                          | Ser208 ↑[TRH] ( _1), Ser216 ↓[AR] ( _2)                                               |
| D3Z8E0     | Rps6ka3  | ribosomal protein S6 kinase A3                   | Thr365 ↑[TRH] ( _2), Ser369 ↑[TRH] ( _2)                                              |
| Q0D2L6     | Rragc    | Ras-related GTP binding C                        | Ser94 ↓[AR] ( _1)                                                                     |
| D3ZI11     | Rreb1    | ras responsive element binding protein 1         | Thr1595 ↑[TRH] ( _3), Ser1597 ↑[TRH] ( _3)                                            |
| G3V7X2     | Scg2     | secretogranin II                                 | Ser491 ↑[TRH] ( _1)                                                                   |
| D3ZWS0     | Scrib    | scribbled planar cell polarity protein           | Ser672 ↑[TRH] ( _1), Ser1207 ↓[AR] ( _2), Ser1209 ↑[TRH] ( _3)                        |
| A0A0G2KAW2 | Sipa1l1  | signal-induced proliferation-associated 1 like 1 | Ser255 ↓[AR] ( _1), Ser1249 ↑[TRH] ( _1), Ser1618 ↓[AR] ( _2), Ser1624 ↓[-3.00] ( _2) |
| D4A3T0     | Sos1     | SOS Ras/Rac guanine nucleotide exchange factor 1 | Thr1255 ↓[AR] ( _2)                                                                   |
| D3ZEX7     | Spire1   | spire-type actin nucleation factor 1             | Ser399 ↑[TRH] ( _3), Ser400 ↑[TRH] ( _3), Ser402 ↑[TRH] ( _3)                         |
| Q9WUD9     | Src      | SRC proto-oncogene, non-receptor tyrosine kinase | Ser75 ↓[AR] ( _1)                                                                     |
| D4A208     | Srgap2   | SLIT-ROBO Rho GTPase activating protein 2        | Ser994 ↓[AR] ( _2)                                                                    |
| E9PTN4     | Srpkl    | SRSF protein kinase 1                            | Ser51 ↓[AR] ( _2)                                                                     |
| A0A0G2JX62 | Srpk2    | SRSF protein kinase 2                            | Ser310 ↓[AR] ( _1)                                                                    |
| D3ZWV8     | Tiam1    | T-cell lymphoma invasion and metastasis 1        | Ser1462 ↓[AR] ( _2)                                                                   |
| F1LN42     | Tns1     | tensin 1                                         | Ser1073 ↓[AR] ( _1)                                                                   |
| Q9Z136     | Tsc1     | tuberous sclerosis 1                             | Ser561 ↓[AR] ( _2), Ser565 ↓[AR] ( _2)                                                |
| D3ZLW4     | Tsc2     | tuberous sclerosis 2                             | Ser1389 ↓[AR] ( _2)                                                                   |
| D3ZMJ7     | Wnk2     | WNK lysine deficient protein kinase 2            | Ser49 ↓[AR] ( _1)                                                                     |

↑, elevated phosphorylation; ↓, decreased phosphorylation; ↓[AR], detected only in  $\beta$ -arrestin2-deficient cells; ↑[TRH], detected only in  $\beta$ -arrestin2-deficient cells stimulated with TRH; ( \_1, \_2, \_3), multiplicity

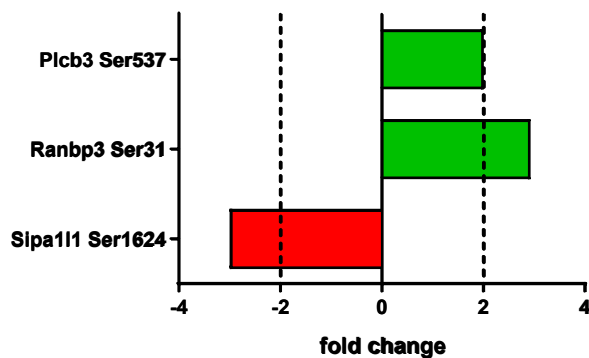

**Figure 8.** Quantitative changes in phosphoproteins involved in the regulation of small GTPase activity in GH1 cells after siRNA-mediated  $\beta$ -arrestin2 knockdown and stimulation with 1  $\mu$ M TRH.

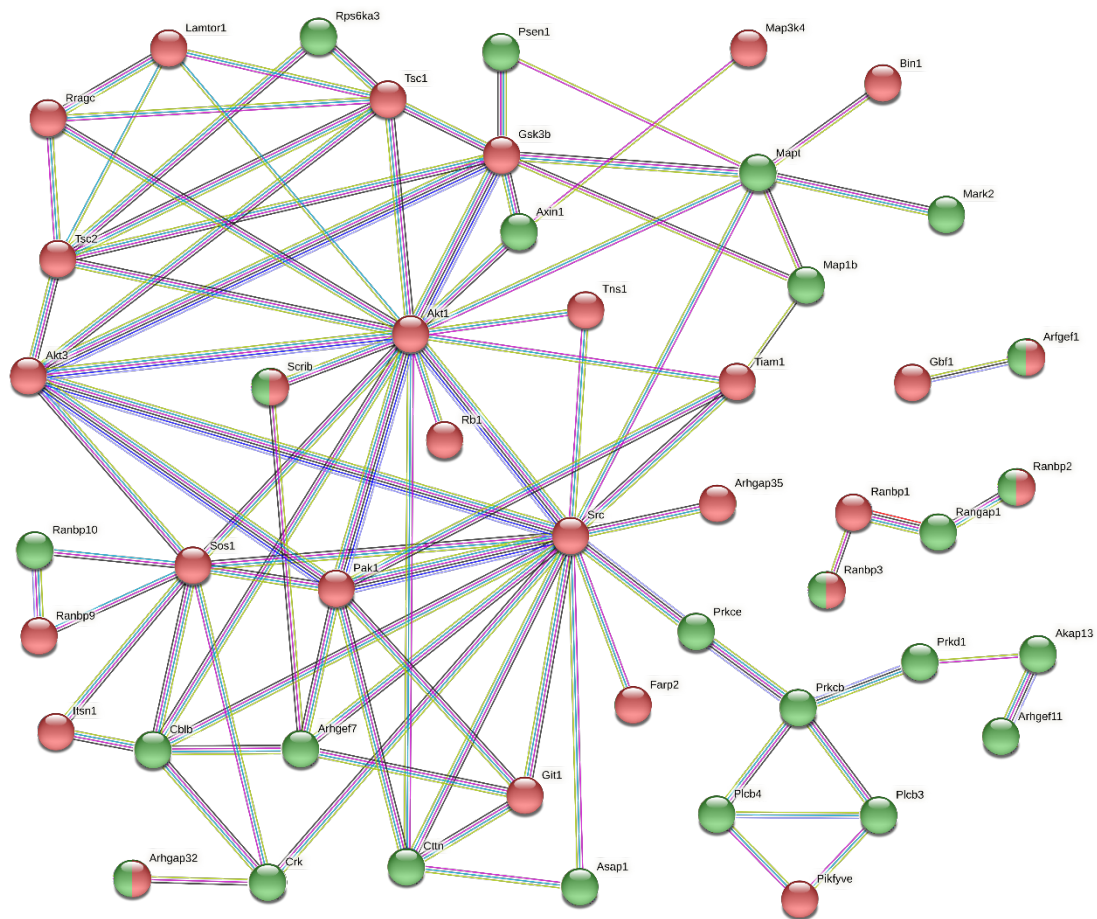

**Figure S9.** A network of differentially phosphorylated proteins involved in the regulation of small GTPase activity in  $\beta$ -arrestin2-deficient GH1 cells after TRH treatment. Elevated phosphorylation in green, decreased phosphorylation in red.



**Table S5.** A list of differentially phosphorylated proteins related to regulation of small GTPase activity in GH1 cells after siRNA-mediated  $\beta$ -arrestin2 knockdown and stimulation with 1  $\mu$ M TAL

| Uniprot ID | Gene ID  | Gene name                                                    | Phosphorylated regions                                                                                                                           |
|------------|----------|--------------------------------------------------------------|--------------------------------------------------------------------------------------------------------------------------------------------------|
| F1M0N1     | Abl2     | ABL proto-oncogene 2, non receptor tyrosine kinase           | Ser629 $\uparrow$ [AR] (1)                                                                                                                       |
| A0A0G2K429 | Adcy6    | adenylate cyclase 6                                          | Thr69 $\downarrow$ [AR] (1)                                                                                                                      |
| F1M3G7     | Akap13   | A-kinase anchoring protein 13                                | Ser2676 $\uparrow$ [TAL] (2)                                                                                                                     |
| P47196     | Akt1     | AKT serine/threonine kinase 1                                | Ser122 $\downarrow$ [AR] (3), Ser126 $\downarrow$ [AR] (2) $\downarrow$ [AR] (1)                                                                 |
| D4A631     | Arfgef1  | ADP ribosylation factor guanine nucleotide exchange factor 1 | Ser286 $\downarrow$ [AR] (1), Ser393 $\uparrow$ [TAL] (2), Ser394 $\uparrow$ [TAL] (2)                                                           |
| D3ZF86     | Arfgef3  | ARFGEF family member 3                                       | Ser387 $\downarrow$ [AR] (2)                                                                                                                     |
| D4A6C5     | Arhgap1  | Rho GTPase activating protein 1                              | Ser51 $\downarrow$ [AR] (2)                                                                                                                      |
| F1LXQ7     | Arhgap21 | Rho GTPase activating protein 21                             | Thr1631 $\downarrow$ [AR] (2)                                                                                                                    |
| F1MAK3     | Arhgap32 | Rho GTPase activating protein 32                             | Ser720 $\uparrow$ [TAL] (1), Ser865 $\uparrow$ [TAL] (2), Ser870 $\uparrow$ [TAL] (2)                                                            |
| D4AD82     | Arhgap35 | Rho GTPase activating protein 35                             | Ser773 $\downarrow$ [AR] (2), Ser985 $\downarrow$ [AR] (2)                                                                                       |
| A0A0G2QC21 | Arhgef7  | Rho guanine nucleotide exchange factor 7                     | Thr159 $\uparrow$ [TAL] (1)                                                                                                                      |
| A0A0G2JZC6 | Arhgef11 | Rho guanine nucleotide exchange factor 11                    | Ser270 $\uparrow$ [TAL] (2), Ser273 $\uparrow$ [TAL] (2)                                                                                         |
| D3ZYR0     | Arhgef12 | Rho guanine nucleotide exchange factor 12                    | Ser341 $\uparrow$ [TAL] (1)                                                                                                                      |
| P0C6P5     | Arhgef28 | Rho guanine nucleotide exchange factor 28                    | Thr1197 $\downarrow$ [AR] (2), Ser1198 $\downarrow$ [AR] (2), Ser1200 $\downarrow$ [AR] (2)                                                      |
| A0A0G2JZE7 | Arhgef40 | Rho guanine nucleotide exchange factor 40                    | Ser958 $\downarrow$ [AR] (1)                                                                                                                     |
| Q4V8I5     | Arl6ip4  | ADP-ribosylation factor like GTPase 6 interacting protein 4  | Ser142 $\uparrow$ [TAL] (1)                                                                                                                      |
| A0A0G2K451 | Asap1    | ArfGAP with SH3 domain, ankyrin repeat and PH domain 1       | Ser855 $\uparrow$ [TAL] (1)                                                                                                                      |
| B2GUV8     | Bcl6     | B-cell CLL/lymphoma 6                                        | Ser308 $\downarrow$ [AR] (2), Ser309 $\downarrow$ [AR] (2)                                                                                       |
| D3ZML2     | Brsk2    | BR serine/threonine kinase 2                                 | Ser424 $\downarrow$ [-3.60] (2), Ser428 $\uparrow$ [TAL] (3) $\downarrow$ [-3.60] (2), Ser436 $\uparrow$ [TAL] (3), Ser490 $\downarrow$ [AR] (1) |
| Q8K4S7     | Cblb     | Cbl proto-oncogene B                                         | Ser476 $\uparrow$ [TAL] (3), Ser480 $\uparrow$ [TAL] (3), Ser483 $\uparrow$ [TAL] (3)                                                            |
| A0A0G2K5Z1 | Cdc42bpa | CDC42 binding protein kinase alpha                           | Ser1622 $\downarrow$ [AR] (2), Ser1625 $\downarrow$ [AR] (2)                                                                                     |
| B1WC33     | Cdc42ep4 | CDC42 effector protein 4                                     | Ser116 $\uparrow$ [TAL] (1)                                                                                                                      |
| E2E1S0     | Cdk15    | cyclin-dependent kinase-like 5                               | Ser407 $\downarrow$ [-2.08] (1)                                                                                                                  |
| G3V8W8     | Cnksr1   | connector enhancer of kinase suppressor of Ras 1             | Thr284 $\downarrow$ [AR] (2)                                                                                                                     |
| A0A1B0GWS4 | Ctnn     | cortactin                                                    | Tyr139 $\uparrow$ [TAL] (2)                                                                                                                      |
| A0A0G2JTF2 | Dab2ip   | DAB2 interacting protein                                     | Ser719 $\downarrow$ [AR] (1)                                                                                                                     |
| A0A0G2KB92 | Dclk1    | doublecortin-like kinase 1                                   | Thr336 $\downarrow$ [AR] (2), Ser340 $\uparrow$ [TAL] (1)                                                                                        |
| F1LTD7     | Dennd4c  | DENN domain containing 4C                                    | Ser1310 $\uparrow$ [TAL] (2)                                                                                                                     |
| G3V7Q0     | Dennd5a  | DENN domain containing 5A                                    | Thr1079 $\downarrow$ [AR] (2), Ser1085 $\downarrow$ [AR] (2)                                                                                     |
| D4A544     | Dennd6a  | DENN domain containing 6A                                    | Ser16 $\downarrow$ [AR] (1)                                                                                                                      |
| F1LRS2     | Dock7    | dedicator of cytokinesis 7                                   | Thr917 $\uparrow$ [TAL] (3)                                                                                                                      |
| G3V6K6     | Egfr     | epidermal growth factor receptor                             | Ser1165 $\downarrow$ [AR] (1)                                                                                                                    |
| F1LYQ8     | Farp1    | FERM, ARH/RhoGEF and pleckstrin domain protein 1             | Ser376 $\uparrow$ [TAL] (2), Ser898 $\uparrow$ [TAL] (3), Thr902 $\uparrow$ [TAL] (3)                                                            |
| D3ZFK8     | Farp2    | FERM, ARH/RhoGEF and pleckstrin domain protein 2             | Thr374 $\downarrow$ [AR] (2), Ser474 $\downarrow$ [AR] (2), Ser477 $\uparrow$ [TAL] (2)                                                          |

|            |         |                                                                          |                                                                                                                     |
|------------|---------|--------------------------------------------------------------------------|---------------------------------------------------------------------------------------------------------------------|
| Q2HWF0     | Fnbp11  | formin binding protein 1-like                                            | Ser488 ↑[TAL] ( _2), Thr496 ↑[TAL] ( _1)                                                                            |
| A0A0G2K3N1 | Gbf1    | golgi brefeldin A resistant                                              |                                                                                                                     |
| A0A0G2K527 | Git1    | guanine nucleotide exchange factor 1                                     | Ser340 ↓[AR] ( _2), Ser1293 ↓[-59.49] ( _1)                                                                         |
| Q66H91     | Git2    | GIT ArfGAP 1                                                             | Ser376 ↓[AR] ( _2) ↓[AR] ( _3)                                                                                      |
| Q9WVE9     | Itsn1   | GIT ArfGAP 2                                                             | Tyr392 ↑[TAL] ( _3) ↓[AR] ( _2), Ser394 ↑[TAL] ( _3), Ser415 ↑[TAL] ( _3), Ser418 ↑[TAL] ( _3), Ser421 ↑[TAL] ( _3) |
| M0R7A6     | Itsn2   | intersectin 1                                                            | Ser334 ↓[AR] ( _2), Ser335 ↓[AR] ( _2), Ser894 ↓[AR] ( _1), Ser896 ↓[AR] ( _2)                                      |
| M0RBD3     | Ksr2    | intersectin 2                                                            | Ser903 ↑[TAL] ( _1), Ser908 ↑[TAL] ( _1)                                                                            |
| Q6P791     | Lamtor1 | kinase suppressor of ras 2                                               | Thr272 ↓[AR] ( _2)                                                                                                  |
| G3V611     | Llgl1   | late endosomal/lysosomal adaptor, MAPK and MTOR activator 1              | Ser26 ↓[AR] ( _1)                                                                                                   |
| O08873     | Madd    | LLGL1, scribble cell polarity complex component                          | Ser997 ↓[AR] ( _3)                                                                                                  |
| P15205     | Map1b   | MAP-kinase activating death domain                                       | Ser1196 ↑[TAL] ( _1)                                                                                                |
| A0A0G2K3R1 | Map3k4  | microtubule-associated protein 1B                                        | Ser1305 ↑[TAL] ( _1), Ser1371 ↑[TAL] ( _1)                                                                          |
| F1M754     | Map4k4  | mitogen activated protein kinase kinase kinase 4                         | Ser59 ↓[AR] ( _3), Ser77 ↓[AR] ( _3)                                                                                |
| A0JN25     | Mapt    | mitogen-activated protein kinase kinase kinase 4                         | Ser852 ↑[TAL] ( _1)                                                                                                 |
| A0A0G2K6X6 | Mark2   | microtubule associated protein tau                                       | Ser306 ↑[TAL] ( _2)                                                                                                 |
| D4A355     | Mastl   | microtubule affinity regulating kinase 2                                 | Ser392 ↑[TAL] ( _1), Ser567 ↑[TAL] ( _1)                                                                            |
| A0A0G2K2Y8 | Mpdz    | microtubule associated serine/threonine kinase-like                      | Ser588 ↑[TAL] ( _1)                                                                                                 |
| Q4W1H3     | Myo9b   | multiple PDZ domain crumbs cell polarity complex component               | Ser1819 ↓[AR] ( _3)                                                                                                 |
| P35465     | Pak1    | myosin IXb                                                               | Ser1982 ↑[TAL] ( _1)                                                                                                |
| F1M785     | Pdzd2   | p21 (RAC1) activated kinase 1                                            | Thr229 ↓[AR] ( _2)                                                                                                  |
| D3ZXY2     | Pdzd8   | PDZ domain containing 2                                                  | Ser887 ↑[TAL] ( _2), Ser891 ↑[TAL] ( _2), Ser2157 ↓[AR] ( _2), Ser2159 ↓[AR] ( _2)                                  |
| D3ZYT8     | Pikfyve | PDZ domain containing 8                                                  | Thr972 ↓[AR] ( _3), Ser973 ↓[AR] ( _3), Ser978 ↓[AR] ( _3)                                                          |
| Q63433     | Pkn1    | phosphoinositide kinase, FYVE-type zinc finger containing                | Ser487 ↓[AR] ( _2) ↓[AR] ( _1), Thr489 ↓[AR] ( _2) ↓[AR] ( _1)                                                      |
| F1M2K6     | Pkp4    | protein kinase N1                                                        | Ser536 ↓[AR] ( _2), Ser920 ↑[TAL] ( _1)                                                                             |
| D3ZCI6     | Plcb4   | plakophilin 4                                                            | Ser220 ↓[AR] ( _2), Ser230 ↓[AR] ( _2)                                                                              |
| G3V9D1     | Plcd1   | phospholipase C, beta 4                                                  | Thr886 ↑[TAL] ( _3)                                                                                                 |
| D3ZW14     | Prex2   | phospholipase C, delta 1                                                 | Thr457 ↑[TAL] ( _2)                                                                                                 |
| P54645     | Prkaa1  | phosphatidylinositol-3,4,5-trisphosphate-dependent Rac exchange factor 2 | Ser826 ↑[TAL] ( _1)                                                                                                 |
| A0A0G2K5Q0 | Prkcb   | protein kinase AMP-activated catalytic subunit alpha 1                   | Thr488 ↓[AR] ( _2), Thr526 ↑[TAL] ( _2), Ser527 ↑[TAL] ( _3)                                                        |
| F1LMV8     | Prkce   | protein kinase C, beta                                                   | Ser643 ↑[TAL] ( _2)                                                                                                 |
| A0A0G2K928 | Prkd1   | protein kinase C, epsilon                                                | Ser140 ↑[TAL] ( _2), Ser148 ↑[TAL] ( _2)                                                                            |
| P97887     | Psen1   | protein kinase D1                                                        | Ser361 ↑[TAL] ( _2), Thr364 ↑[TAL] ( _2)                                                                            |
|            |         | presenilin 1                                                             | Ser368 ↑[TAL] ( _3), Thr371 ↑[TAL] ( _3), Ser372 ↑[TAL] ( _3)                                                       |

|            |           |                                                  |                                                                                                                         |
|------------|-----------|--------------------------------------------------|-------------------------------------------------------------------------------------------------------------------------|
| P70600     | Ptk2b     | protein tyrosine kinase 2 beta                   | Ser389 ↓[AR] ( _3), Ser392 ↓[AR] ( _3), Ser394 ↓[AR] ( _3), Ser396 ↓[AR] ( _3), Ser399 ↓[AR] ( _3)                      |
| A0A0G2K1B4 | Rab3ip    | RAB3A interacting protein                        | Ser247 ↓[AR] ( _2)                                                                                                      |
| A0A0G2JYK2 | Rab11fip1 | RAB11 family interacting protein 1               | Ser990 ↑[TAL] ( _2)                                                                                                     |
| D3ZX42     | Rabgap1   | RAB GTPase activating protein 1                  | Ser988 ↑[TAL] ( _2), Thr992 ↑[TAL] ( _2)                                                                                |
| D3ZKH6     | Rabgap1l  | RAB GTPase activating protein 1-like             | Ser128 ↑[8.98] ( _1)                                                                                                    |
| Q5FVT1     | Ralbp1    | ralA binding protein 1                           | Ser30 ↓[AR] ( _2), Ser34 ↑[TAL] ( _2), Ser92 ↑[TAL] ( _3), Ser93 ↑[TAL] ( _3), Ser99 ↑[TAL] ( _3)                       |
| Q0VGK1     | Ralgps2   | Ral GEF with PH domain and SH3 binding motif 2   | Ser293 ↓[AR] ( _1), Ser308 ↑[TAL] ( _1), Ser315 ↓[AR] ( _3)                                                             |
| D4A2G9     | Ranbp1    | RAN binding protein 1                            | Ser21 ↓[AR] ( _1)                                                                                                       |
| D4A054     | Ranbp2    | RAN binding protein 2                            | Ser1154 ↓[AR] ( _1), Ser2088 ↑[TAL] ( _3), Ser2092 ↑[TAL] ( _3), Ser2096 ↑[TAL] ( _3), Ser2097 ↑[TAL] ( _3) ↓[AR] ( _2) |
| M0R920     | Ranbp3    | RAN binding protein 3                            | Ser27 ↑[TAL] ( _3), Ser30 ↑[TAL] ( _3), Ser31 ↑[TAL] ( _3) ↑[2.47] ( _2)                                                |
| F1LVV3     | Ranbp9    | RAN binding protein 9                            | Ser459 ↓[AR] ( _1)                                                                                                      |
| D3Z7Z5     | Ranbp10   | RAN binding protein 10                           | Ser463 ↑[TAL] ( _3), ↓[AR] ( _2)                                                                                        |
| F1MAA5     | Rangap1   | RAN GTPase activating protein 1                  | Ser427 ↑[TAL] ( _2)                                                                                                     |
| D3ZPI4     | Rap1gap2  | RAP1 GTPase activating protein 2                 | Ser361 ↑[TAL] ( _2)                                                                                                     |
| D3ZTL8     | Rapgef6   | Rap guanine nucleotide exchange factor 6         | Ser1237 ↑[TAL] ( _2), Ser1241 ↓[AR] ( _3), Ser1245 ↓[AR] ( _3), Ser1595 ↑[TAL] ( _1)                                    |
| O35141     | Rassf5    | Ras association domain family member 5           | Ser177 ↑[TAL] ( _1)                                                                                                     |
| P33568     | Rb1       | RB transcriptional corepressor 1                 | Thr363 ↓[AR] ( _2), Thr366 ↓[AR] ( _2), Ser600 ↓[AR] ( _2), Ser604 ↓[AR] ( _2)                                          |
| D3ZL11     | Rbsn      | rabenosyn, RAB effector                          | Ser208 ↑[TAL] ( _1), Ser216 ↓[AR] ( _2)                                                                                 |
| Q0D2L6     | Rragc     | Ras-related GTP binding C                        | Ser94 ↓[AR] ( _1)                                                                                                       |
| D3ZI11     | Rreb1     | ras responsive element binding protein 1         | Ser1361 ↑[TAL] ( _2), Ser1364 ↑[TAL] ( _2)                                                                              |
| G3V7X2     | Scg2      | secretogranin II                                 | Ser495 ↑[TAL] ( _1)                                                                                                     |
| D3ZWS0     | Scrib     | scribbled planar cell polarity protein           | Ser672 ↑[TAL] ( _1), Ser1207 ↓[AR] ( _2), Ser1209 ↓[AR] ( _2)                                                           |
| M0R617     | Sh2b1     | SH2B adaptor protein 1                           | Ser126 ↓[AR] ( _3), Ser127 ↓[AR] ( _3)                                                                                  |
| Q9Z200     | Sh2b2     | SH2B adaptor protein 2                           | Ser584 ↓[AR] ( _2)                                                                                                      |
| E9PSX8     | Sipa1     | signal-induced proliferation-associated 1        | Ser815 ↑[TAL] ( _1)                                                                                                     |
| A0A0G2KAW2 | Sipa1l1   | signal-induced proliferation-associated 1 like 1 | Ser1249 ↑[TAL] ( _1), Ser1543 ↑[TAL] ( _2)                                                                              |
| D4A3T0     | Sos1      | SOS Ras/Rac guanine nucleotide exchange factor 1 | Ser1078 ↑[TAL] ( _2), Ser1082 ↑[TAL] ( _2), Thr1255 ↓[AR] ( _2), Ser1319 ↓[AR] ( _1)                                    |
| D3ZEX7     | Spire1    | spire-type actin nucleation factor 1             | Ser399 ↑[TAL] ( _3), Ser400 ↑[TAL] ( _3), Ser402 ↑[TAL] ( _3)                                                           |
| Q9WUD9     | Src       | SRC proto-oncogene, non-receptor tyrosine kinase | Ser75 ↓[AR] ( _1)                                                                                                       |
| D4A208     | Srgap2    | SLIT-ROBO Rho GTPase activating protein 2        | Thr998 ↑[TAL] ( _2)                                                                                                     |
| E9PTN4     | Srpk1     | SRSF protein kinase 1                            | Ser51 ↓[AR] ( _2), Ser311 ↑[TAL] ( _1)                                                                                  |
| A0A0G2JX62 | Srpk2     | SRSF protein kinase 2                            | Ser310 ↓[AR] ( _1)                                                                                                      |
| F1LRL4     | Tbc1d9b   | TBC1 domain family member 9B                     | Ser1084 ↑[TAL] ( _2) ↓[AR] ( _1), Ser1089 ↑[TAL] ( _2)                                                                  |

|            |          |                                           |                                                                                                                     |
|------------|----------|-------------------------------------------|---------------------------------------------------------------------------------------------------------------------|
| D3ZSY8     | Tbc1d10b | TBC1 domain family, member 10b            | Ser128 ↓[AR] (_3), Thr135 ↓[AR] (_3), Thr137 ↑[TAL] (_3), Thr139 ↓[AR] (_3), Ser231 ↑[TAL] (_2), Thr232 ↑[TAL] (_2) |
| D3ZWV8     | Tiam1    | T-cell lymphoma invasion and metastasis 1 | Ser725 ↓[AR] (_1), Ser1462 ↓[AR] (_2)                                                                               |
| F1LN91     | Tns3     | tensin 3                                  | Ser891 ↓[AR] (_1)                                                                                                   |
| Q9Z136     | Tsc1     | tuberous sclerosis 1                      | Ser561 ↓[AR] (_2), Ser565 ↓[AR] (_2), Ser1097 ↑[TAL] (_1)                                                           |
| A0A0G2K3A0 | Wnk1     | WNK lysine deficient protein kinase 1     | Ser1809 ↓[AR] (_2)                                                                                                  |
| D3ZMJ7     | Wnk2     | WNK lysine deficient protein kinase 2     | Ser1830 ↓[AR] (_2), Ser1831 ↓[AR] (_2)                                                                              |
| A0A1W2Q6C5 | Wnk3     | WNK lysine deficient protein kinase 3     | Ser436 ↓[AR] (_3), Thr449 ↓[AR] (_3)                                                                                |

↑, elevated phosphorylation; ↓, decreased phosphorylation; ↓[AR], detected only in  $\beta$ -arrestin2-deficient cells; ↑[TAL], detected only in  $\beta$ -arrestin2-deficient cells stimulated with TAL; (\_1, \_2, \_3), multiplicity

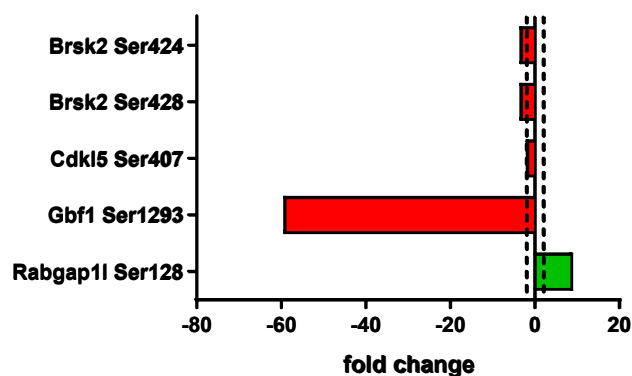

**Figure S10.** Quantitative changes in phosphoproteins involved in the regulation of small GTPase activity in GH1 cells after siRNA-mediated  $\beta$ -arrestin2 knockdown and stimulation with 1  $\mu$ M TAL.

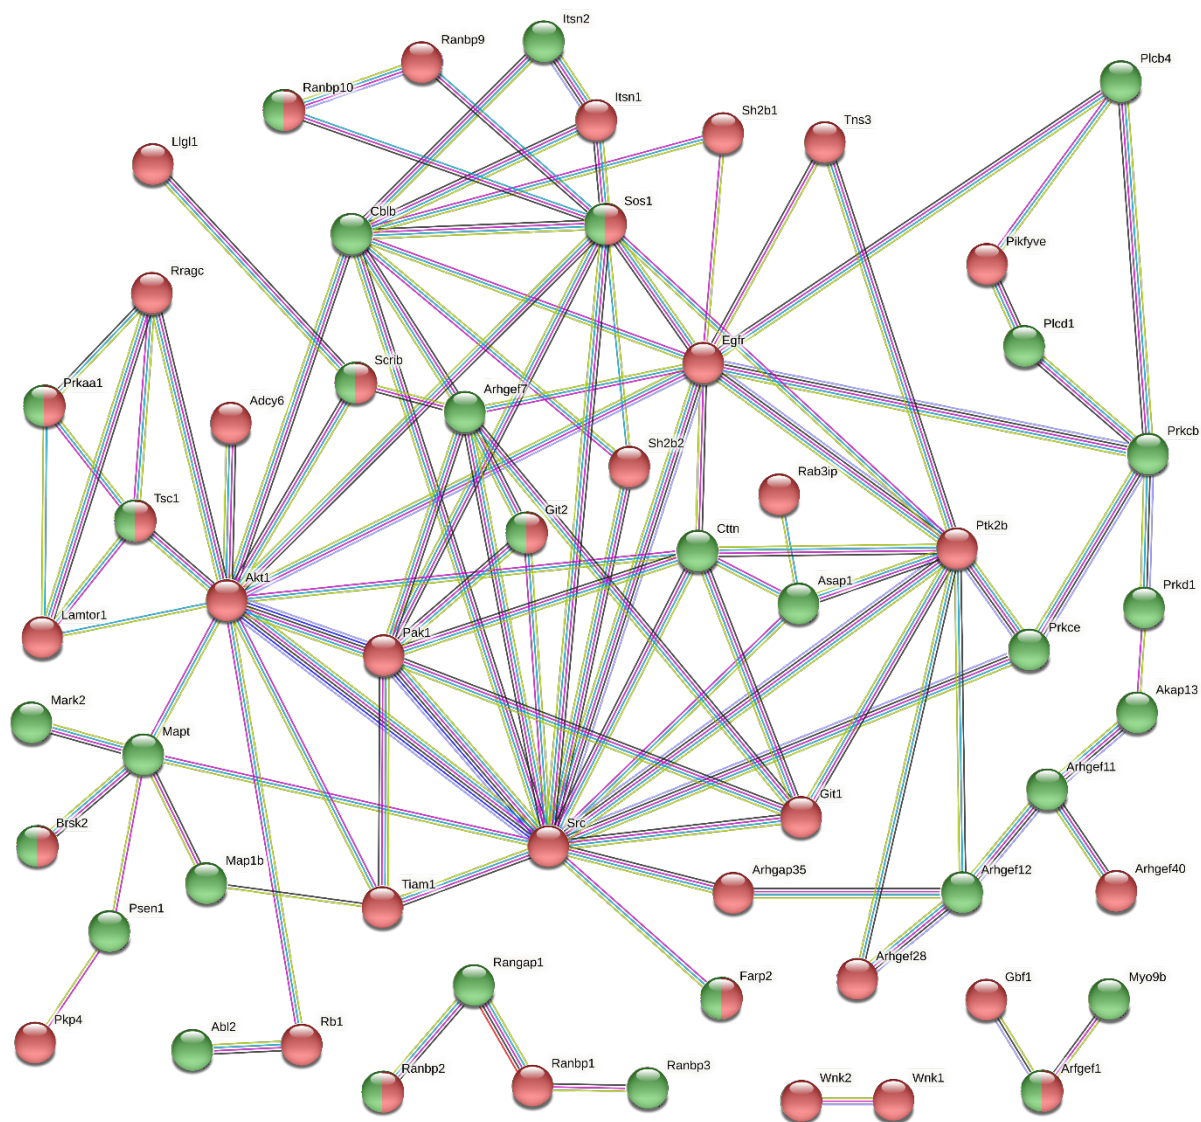

**Figure S11.** A network of differentially phosphorylated proteins involved in the regulation of small GTPase activity in  $\beta$ -arrestin2-deficient GH1 cells after TAL treatment. Elevated phosphorylation in green, decreased phosphorylation in red.

**Table S6.** A list of differentially phosphorylated proteins involved in MAP kinase-mediated signaling in GH1 cells after siRNA-mediated  $\beta$ -arrestin2 knockdown

| Uniprot ID | Gene ID  | Gene name                                                         | Phosphorylated regions                                                                                                                                                                                                                                   |
|------------|----------|-------------------------------------------------------------------|----------------------------------------------------------------------------------------------------------------------------------------------------------------------------------------------------------------------------------------------------------|
| F1LRI7     | Aak1     | AP2 associated kinase 1                                           | Thr608 $\uparrow$ [12.88] ( $\_1$ )                                                                                                                                                                                                                      |
| F1M0N1     | Abl2     | ABL proto-oncogene 2, non-receptor tyrosine kinase                | Ser629 $\uparrow$ [70.75] ( $\_1$ )                                                                                                                                                                                                                      |
| G3V6M0     | Akap6    | A-kinase anchoring protein 6                                      | Ser423 $\uparrow$ [AR] ( $\_1$ ), Ser2208 $\uparrow$ [AR] ( $\_2$ )                                                                                                                                                                                      |
| F1LPB4     | Akap9    | A-kinase anchoring protein 9                                      | Ser1500 $\downarrow$ [C] ( $\_1$ )                                                                                                                                                                                                                       |
| F1LR81     | Akap11   | A-kinase anchoring protein 11                                     | Ser434 $\downarrow$ [C] ( $\_3$ ), Ser439 $\downarrow$ [C] ( $\_3$ ), Ser440 $\downarrow$ [C] ( $\_3$ )                                                                                                                                                  |
| P47196     | Akt1     | AKT serine/threonine kinase 1                                     | Ser124 $\uparrow$ [169.68] ( $\_2$ ), Ser 124 $\uparrow$ [93.14] ( $\_1$ ), Ser126 $\uparrow$ [AR] ( $\_2$ ), Ser126 $\uparrow$ [155.76] ( $\_3$ ), Ser129 $\uparrow$ [155.76] ( $\_3$ )                                                                 |
| F1M7M4     | Bmp2k    | BMP-2 inducible kinase                                            | Thr757 $\uparrow$ [AR] ( $\_2$ ), Ser934 $\uparrow$ [AR] ( $\_2$ ), Ser936 $\uparrow$ [AR] ( $\_2$ )                                                                                                                                                     |
| A0A0G2JYV0 | Brd4     | bromodomain containing 4                                          | Ser471 $\uparrow$ [AR] ( $\_1$ ), Ser1085 $\uparrow$ [104.47] ( $\_3$ )                                                                                                                                                                                  |
| B2DD29     | Brsk1    | BR serine/threonine kinase 1                                      | Ser490 $\uparrow$ [AR] ( $\_1$ ), Thr583 $\downarrow$ [C] ( $\_2$ ), Ser587 $\downarrow$ [C] ( $\_2$ )                                                                                                                                                   |
| D3ZML2     | Brsk2    | BR serine/threonine kinase 2                                      | Ser424 $\uparrow$ [13.84] ( $\_2$ ), Ser428 $\downarrow$ [C] ( $\_3$ ) $\uparrow$ [13.84] ( $\_2$ ), Ser436 $\downarrow$ [C] ( $\_3$ ) $\uparrow$ [AR] ( $\_2$ ), Ser440 $\uparrow$ [AR] ( $\_2$ ), Ser490 $\uparrow$ [AR] ( $\_1$ )                     |
| F1LNI8     | Camk2b   | calcium/calmodulin-dependent protein kinase II beta               | Ser355 $\uparrow$ [AR] ( $\_3$ ), Ser356 $\uparrow$ [AR] ( $\_3$ ), Ser358 $\downarrow$ [C] ( $\_2$ ) $\uparrow$ [AR] ( $\_3$ )                                                                                                                          |
| A0A0G2K5C0 | Camsap3  | calmodulin regulated spectrin-associated protein family, member 3 | Ser319 $\uparrow$ [AR] ( $\_2$ ), Ser320 $\downarrow$ [C] ( $\_1$ )                                                                                                                                                                                      |
| D3ZYD7     | Ccdc88a  | coiled coil domain containing 88A                                 | Ser1319 $\downarrow$ [C] ( $\_1$ ), Ser1343 $\uparrow$ [AR] ( $\_1$ )                                                                                                                                                                                    |
| F1M4U0     | Ccny11   | cyclin Y-like 1                                                   | Ser349 $\uparrow$ [AR] ( $\_1$ )                                                                                                                                                                                                                         |
| A0A0G2K5Z1 | Cdc42bpa | CDC42 binding protein kinase alpha                                | Ser1618 $\uparrow$ [AR] ( $\_3$ ), Ser1622 $\uparrow$ [AR] ( $\_2$ ), Ser1625 $\uparrow$ [AR] ( $\_2$ )                                                                                                                                                  |
| Q7TT49     | Cdc42bpb | CDC42 binding protein kinase beta                                 | Ser1688 $\uparrow$ [5.81] ( $\_3$ ), Ser1692 $\uparrow$ [5.81] ( $\_3$ ), Ser1695 $\uparrow$ [5.81] ( $\_3$ )                                                                                                                                            |
| Q6P751     | Cdk2     | cyclin dependent kinase 2                                         | Thr14 $\uparrow$ [134.24] ( $\_2$ ), Tyr15 $\uparrow$ [134.24] ( $\_2$ )                                                                                                                                                                                 |
| P35426     | Cdk4     | cyclin-dependent kinase 4                                         | Ser300 $\uparrow$ [AR] ( $\_1$ )                                                                                                                                                                                                                         |
| D4A3G2     | Cdk11b   | cyclin-dependent kinase 11B                                       | Tyr751 $\uparrow$ [AR] ( $\_2$ )                                                                                                                                                                                                                         |
| A0A0G2K5U7 | Cdk12    | cyclin-dependent kinase 12                                        | Ser331 $\uparrow$ [7.72] ( $\_2$ ), Ser333 $\uparrow$ [AR] ( $\_2$ ), Ser378 $\uparrow$ [AR] ( $\_3$ ), Ser381 $\uparrow$ [AR] ( $\_3$ ), Ser382 $\uparrow$ [468.89] ( $\_2$ ), Ser384 $\uparrow$ [434.23] ( $\_2$ ), Ser681 $\uparrow$ [6.69] ( $\_2$ ) |
| A0A0H2UHG4 | Cdk18    | cyclin-dependent kinase 18                                        | Ser65 $\uparrow$ [157.60] ( $\_1$ ), Ser80 $\uparrow$ [5.04] ( $\_1$ )                                                                                                                                                                                   |
| E2E1S0     | Cdk15    | cyclin-dependent kinase-like 5                                    | Ser407 $\uparrow$ [17.43] ( $\_1$ )                                                                                                                                                                                                                      |
| D4ADG3     | Clk1     | CDC-like kinase 1                                                 | Ser137 $\uparrow$ [41.56] ( $\_2$ ), Ser139 $\uparrow$ [41.56] ( $\_2$ )                                                                                                                                                                                 |
| D3ZHC3     | Clspn    | claspin                                                           | Ser77 $\uparrow$ [AR] ( $\_3$ )                                                                                                                                                                                                                          |
| D3ZKK3     | Cnst     | consortin, connexin sorting protein                               | Ser117 $\downarrow$ [C] ( $\_1$ ), Ser119 $\uparrow$ [17.93] ( $\_1$ )                                                                                                                                                                                   |
| A0A096MJD3 | Csnk2b   | casein kinase 2 beta                                              | Ser154 $\uparrow$ [AR] ( $\_1$ )                                                                                                                                                                                                                         |

|            |              |                                                               |                                                                                                                                                                                                                |
|------------|--------------|---------------------------------------------------------------|----------------------------------------------------------------------------------------------------------------------------------------------------------------------------------------------------------------|
| A0A0G2JTF2 | Dab2ip       | DAB2 interacting protein                                      | Ser719 ↑[AR] ( _1)                                                                                                                                                                                             |
| Q6MGC8     | Daxx         | death-domain associated protein                               | Ser521 ↓[C] ( _2), Ser526 ↓[C] ( _2)                                                                                                                                                                           |
| A0A0G2KB92 | Dclk1        | doublecortin-like kinase 1                                    | Ser305 ↑[AR] ( _2), Ser307 ↑[AR] ( _2), Ser332 ↑[AR] ( _3), Thr336 ↑[AR] ( _2), Ser337 ↑[AR] ( _3)                                                                                                             |
| Q9WVB9     | Dvl1         | dishevelled segment polarity protein 1                        | Ser194 ↑[AR] ( _1)                                                                                                                                                                                             |
| D3ZB71     | Dvl2         | dishevelled segment polarity protein 2                        | Ser211 ↓[C] ( _1)                                                                                                                                                                                              |
| D4ADV8     | Dvl3         | dishevelled segment polarity protein 3                        | Ser48 ↑[AR] ( _1)                                                                                                                                                                                              |
| D4ACC4     | Dyrk1b       | dual specificity tyrosine phosphorylation regulated kinase 1B | Tyr273 ↑[AR] ( _1)                                                                                                                                                                                             |
| G3V6K6     | Egfr         | epidermal growth factor receptor                              | Ser1165 ↑[AR] ( _1)                                                                                                                                                                                            |
| D4A554     | Eif4g3       | eukaryotic translation initiation factor 4 gamma, 3           | Ser305 ↑[AR] ( _1), Ser1188 ↑[AR] ( _1)                                                                                                                                                                        |
| G3V6N1     | ErbB3        | erb-b2 receptor tyrosine kinase 3                             | Ser980 ↑[AR] ( _2), Thr984 ↑[AR] ( _2)                                                                                                                                                                         |
| B5DFE2     | Ezh2         | enhancer of zeste 2 polycomb repressive complex 2 subunit     | Ser362 ↑[AR] ( _2), Ser363 ↑[AR] ( _2)                                                                                                                                                                         |
| F1LYQ8     | Farp1        | FERM, ARH/RhoGEF and pleckstrin domain protein 1              | Thr371 ↑[AR] ( _2), Ser373 ↑[AR] ( _2), Ser893 ↑[16.79] ( _3), Thr902 ↓[C] ( _3), Ser903 ↑[64.70] ( _3)                                                                                                        |
| F1LMD9     | Gak          | cyclin G associated kinase                                    | Ser824 ↓[C] ( _2), Ser827 ↓[C] ( _2)                                                                                                                                                                           |
| D3ZUP4     | Gpatch2l     | G patch domain containing 2-like                              | Ser86 ↓[C] ( _2), Ser88 ↓[C] ( _2)                                                                                                                                                                             |
| P51639     | Hmgcr        | 3-hydroxy-3-methylglutaryl-CoA reductase                      | Ser356 ↑[AR] ( _2), Thr360 ↑[AR] ( _2)                                                                                                                                                                         |
| A0A0G2K2T6 | Ilf3         | interleukin enhancer binding factor 3                         | Thr67 ↑[AR] ( _1)                                                                                                                                                                                              |
| F1LZV1     | Kalrn        | kalirin, RhoGEF kinase                                        | Ser1790 ↑[AR] ( _1), Ser1808 ↑[AR] ( _1)                                                                                                                                                                       |
| Q9EQG6     | Kidins220    | kinase D-interacting substrate 220                            | Ser1513 ↓[C] ( _2), Ser1518 ↓[C] ( _2), Thr1520 ↑[AR] ( _2)                                                                                                                                                    |
| M0RBD3     | Ksr2         | kinase suppressor of ras 2                                    | Thr272 ↑[19.47] ( _2)                                                                                                                                                                                          |
| F1M2K4     | Lats1        | large tumor suppressor kinase 1                               | Ser464 ↑[AR] ( _1), Ser1111 ↓[C] ( _1)                                                                                                                                                                         |
| D3ZBH5     | Lmtk2        | lemur tyrosine kinase 2                                       | Ser576 ↑[AR] ( _2), Ser704 ↑[AR] ( _1), Ser712 ↑[AR] ( _2), Ser746 ↑[7.46] ( _2), Ser750 ↑[9.64] ( _2), Ser756 ↑[AR] ( _2), Ser1035 ↑[AR] ( _1), Ser1334 ↑[AR] ( _3), Ser1524 ↑[AR] ( _2), Ser1525 ↑[AR] ( _2) |
| F1M0A6     | LOC100909750 | tyrosine-protein kinase ABL1-like                             | Ser798 ↓[C] ( _3), Ser801 ↓[C] ( _2)                                                                                                                                                                           |
| D4A930     | Maml1        | mastermind-like transcriptional coactivator 1                 | Ser88 ↑[AR] ( _1)                                                                                                                                                                                              |
| F1M9D0     | Map3k2       | mitogen activated protein kinase kinase kinase 2              | Ser163 ↑[AR] ( _1), Ser239 ↑[AR] ( _1), Ser331 ↑[AR] ( _1), Thr337 ↑[AR] ( _2), Ser344 ↑[AR] ( _2)                                                                                                             |
| D3ZW27     | Map3k5       | mitogen-activated protein kinase kinase kinase 5              | Ser1027 ↑[AR] ( _2), Ser1031 ↑[AR] ( _2)                                                                                                                                                                       |
| P0C8E4     | Map3k7       | mitogen activated protein kinase kinase kinase 7              | Ser439 ↑[AR] ( _2)                                                                                                                                                                                             |
| A0A0G2JUN9 | Map3k9       | mitogen-activated protein kinase kinase kinase 9              | Ser541 ↑[AR] ( _2), Ser545 ↑[AR] ( _2)                                                                                                                                                                         |
| D3Z8I4     | Map4k1       | mitogen activated protein kinase kinase kinase 1              | Ser373 ↓[C] ( _2), Ser375 ↓[C] ( _2), Tyr379 ↑[4.06] ( _2)                                                                                                                                                     |

|            |           |                                                               |                                                                                                                                                         |
|------------|-----------|---------------------------------------------------------------|---------------------------------------------------------------------------------------------------------------------------------------------------------|
| G3V9M2     | Mapk8ip2  | mitogen-activated protein kinase 8 interacting protein 2      | Ser254 ↑[AR] ( _2)                                                                                                                                      |
| A0A0G2K7H9 | Mark1     | microtubule affinity regulating kinase 1                      | Ser348 ↑[AR] ( _2)                                                                                                                                      |
| F1M836     | Mark3     | microtubule affinity regulating kinase 3                      | Ser469 ↑[8.07] ( _1)                                                                                                                                    |
| D3ZL30     | Mast3     | microtubule associated serine/threonine kinase 3              | Ser354 ↑[12.14] ( _1), Ser1201 ↑[AR] ( _2), Ser1213 ↑[AR] ( _2)                                                                                         |
| A0A0G2K382 | Mink1     | misshapen-like kinase 1                                       | Ser760 ↑[AR] ( _1), Ser777 ↑[AR] ( _2), Ser781 ↑[AR] ( _2)                                                                                              |
| G3V968     | Mphosph10 | M-phase phosphoprotein 10                                     | Ser164 ↓[C] ( _2)                                                                                                                                       |
| A0A140TA95 | Mprp      | myosin phosphatase Rho interacting protein                    | Ser230 ↑[9.91] ( _2), Ser294 ↑[AR] ( _2)                                                                                                                |
| A0A0G2JX74 | Mtor      | mechanistic target of rapamycin                               | Ser2478 ↑[AR] ( _2), Ser2481 ↑[AR] ( _2)                                                                                                                |
| A0A0G2JSU4 | Ndrp2     | NDRG family member 2                                          | Ser314 ↑[AR] ( _3), Ser318 ↑[AR] ( _2), Ser324 ↑[AR] ( _2), Ser336 ↓[C] ( _3)                                                                           |
| A0A0G2JWL3 | Nf1       | neurofibromin 1                                               | Ser821 ↑[AR] ( _2), Ser824 ↑[AR] ( _2), Ser2488 ↑[AR] ( _1)                                                                                             |
| Q63035     | Nlrp6     | NLR family, pyrin domain containing 6                         | Thr719 ↑[43.01] ( _3), Thr728 ↑[43.01] ( _3)                                                                                                            |
| G3V7Z8     | Pabpn1    | poly(A) binding protein, nuclear 1                            | Ser91 ↑[AR] ( _1)                                                                                                                                       |
| P35465     | Pak1      | p21 (RAC1) activated kinase 1                                 | Thr184 ↑[AR] ( _1), Ser219 ↑[AR] ( _2), Ser222 ↑[AR] ( _1), Thr228 ↓[C] ( _1), Thr229 ↑[AR] ( _2)                                                       |
| B5DF62     | Pak4      | p21 (RAC1) activated kinase 4                                 | Ser181 ↑[AR] ( _1)                                                                                                                                      |
| D3ZQ51     | Pak6      | p21 (RAC1) activated kinase 6                                 | Ser328 ↑[AR] ( _1), Ser346 ↑[AR] ( _2), Ser347 ↑[AR] ( _2), Ser351 ↑[AR] ( _2)                                                                          |
| Q63433     | Pkn1      | protein kinase N1                                             | Ser920 ↓[C] ( _1)                                                                                                                                       |
| A0A0G2K6J2 | Pkn2      | protein kinase N2                                             | Ser468 ↑[22.69] ( _1)                                                                                                                                   |
| A0A0H2UHA0 | Ppp1r2    | protein phosphatase 1, regulatory (inhibitor) subunit 2       | Ser47 ↑[57.29] ( _1), Ser47 ↑[AR] ( _2), Ser49 ↑[AR] ( _2), Ser81 ↑[15.99] ( _2), Ser82 ↑[15.99] ( _2)                                                  |
| O35274     | Ppp1r9b   | protein phosphatase 1, regulatory subunit 9B                  | Ser100 ↑[AR] ( _1)                                                                                                                                      |
| Q99MC0     | Ppp1r14a  | protein phosphatase 1, regulatory (inhibitor) subunit 14A     | Ser136 ↓[C] ( _1)                                                                                                                                       |
| D3ZG37     | Ppp6r1    | protein phosphatase 6, regulatory subunit 1                   | Thr524 ↑[22.12] ( _3), Ser529 ↓[C] ( _2) ↑[9.58] ( _3), Ser530 ↓[C] ( _2) ↑[9.58] ( _3), Ser531 ↑[291.69] ( _3), Ser740 ↑[AR] ( _2), Ser746 ↑[AR] ( _2) |
| D3ZBT9     | Ppp6r3    | protein phosphatase 6, regulatory subunit 3                   | Thr518 ↓[C] ( _3), Ser523 ↑[45.78] ( _2), Ser525 ↑[AR] ( _3)                                                                                            |
| P54645     | Prkaa1    | protein kinase AMP-activated catalytic subunit alpha 1        | Thr488 ↑[AR] ( _2), Ser527 ↓[C] ( _3) ↑[AR] ( _2)                                                                                                       |
| P80386     | Prkab1    | protein kinase AMP-activated non-catalytic subunit beta 1     | Ser108 ↑[AR] ( _1)                                                                                                                                      |
| P09456     | Prkar1a   | protein kinase cAMP-dependent type 1 regulatory subunit alpha | Ser83 ↑[AR] ( _1)                                                                                                                                       |
| A0A0G2K405 | Prkar2a   | protein kinase cAMP-dependent type 2 regulatory subunit alpha | Ser97 ↑[AR] ( _1)                                                                                                                                       |
| A0A0G2K5Q0 | Prkcb     | protein kinase C, beta                                        | Ser639 ↑[AR] ( _1)                                                                                                                                      |
| D4A0U0     | Prkcd     | protein kinase C, delta                                       | Ser642 ↑[AR] ( _1)                                                                                                                                      |



|            |          |                                                        |                                                                                                                                                                                          |
|------------|----------|--------------------------------------------------------|------------------------------------------------------------------------------------------------------------------------------------------------------------------------------------------|
| F1LMV8     | Prkce    | protein kinase C, epsilon                              | Ser140 ↓[C] (2)                                                                                                                                                                          |
| A0A0G2K928 | Prkd1    | protein kinase D1                                      | Ser161 ↑[24.30] (2), Ser164 ↑[24.30] (2), Ser361 ↓[C] (2), Ser361 ↑[25.40] (1), Thr364 ↓[C] (2)                                                                                          |
| Q5XIS9     | Prkd2    | protein kinase D2                                      | Ser197 ↑[AR] (2), Ser198 ↑[AR] (2), Ser206 ↑[AR] (2), Ser711 ↑[AR] (1)                                                                                                                   |
| Q5RKH1     | Prpf4b   | pre-mRNA processing factor 4B                          | Ser21 ↓[C] (3), Ser24 ↓[C] (3), Ser33 ↓[C] (3), Ser143 ↑[25.60] (2), Ser145 ↑[25.60] (2), Ser366 ↑[64.57] (2), Ser368 ↑[64.57] (2), Ser576 ↑[AR] (3), Ser578 ↑[AR] (3), Ser580 ↑[AR] (3) |
| A0A0G2K064 | Ptpn6    | protein tyrosine phosphatase, non-receptor type 6      | Ser10 ↑[AR] (1)                                                                                                                                                                          |
| F1LVV3     | Ranbp9   | RAN binding protein 9                                  | Ser440 ↑[AR] (3), Ser446 ↑[57.73] (2), Ser459 ↑[AR] (1)                                                                                                                                  |
| F1M8L9     | Rapgef1  | Rap guanine nucleotide exchange factor 1               | Ser375 ↑[AR] (1)                                                                                                                                                                         |
| D3ZHK4     | Rb1cc1   | RB1-inducible coiled-coil 1                            | Ser237 ↑[AR] (1), Thr238 ↑[AR] (2), Ser243 ↑[AR] (2)                                                                                                                                     |
| D3ZN37     | Rock1    | Rho-associated coiled-coil containing protein kinase 1 | Ser1105 ↑[8.38] (2)                                                                                                                                                                      |
| F1LQT3     | Rock2    | Rho-associated coiled-coil containing protein kinase 2 | Ser1124 ↑[AR] (2) ↑[AR] (1), Ser1127 ↑[6.58] (2)                                                                                                                                         |
| D3Z8E0     | Rps6ka3  | ribosomal protein S6 kinase A3                         | Ser715 ↑[AR] (1)                                                                                                                                                                         |
| A0A0G2KB60 | Rps6kc1  | ribosomal protein S6 kinase C1                         | Ser635 ↓[C] (2), Ser639 ↓[C] (2)                                                                                                                                                         |
| D3ZDU2     | Rptor    | regulatory associated protein of MTOR, complex 1       | Thr857 ↑[AR] (2), Ser859 ↓[C] (2)                                                                                                                                                        |
| F1LU97     | Sash1    | SAM and SH3 domain containing 1                        | Ser534 ↑[AR] (2), Ser541 ↓[C] (2)                                                                                                                                                        |
| G3V7X2     | Scg2     | secretogranin II                                       | Ser176 ↑[AR] (1), Ser495 ↓[C] (1)                                                                                                                                                        |
| D4AEB3     | Setx     | senataxin                                              | Ser997 ↑[AR] (2), Ser999 ↑[AR] (2)                                                                                                                                                       |
| M0RD40     | Sik3     | SIK family kinase 3                                    | Ser493 ↑[AR] (1), Ser534 ↑[AR] (1), Ser856 ↑[AR] (1)                                                                                                                                     |
| Q9JJ19     | Slc9a3r1 | SLC9A3 regulator 1                                     | Ser287 ↑[AR] (1)                                                                                                                                                                         |
| Q63553     | Snrk     | SNF related kinase                                     | Ser569 ↑[AR] (1)                                                                                                                                                                         |
| P07632     | Sod1     | superoxide dismutase 1, soluble                        | Ser99 ↑[AR] (1)                                                                                                                                                                          |
| D3ZJA3     | Spry4    | sprouty RTK signaling antagonist 4(Spry4)              | Ser126 ↑[AR] (1)                                                                                                                                                                         |
| O08623     | Sqstm1   | sequestosome 1                                         | Thr266 ↓[C] (2), Ser354 ↑[AR] (2), Ser364 ↓[C] (1)                                                                                                                                       |
| Q9WUD9     | Src      | SRC proto-oncogene, non-receptor tyrosine kinase       | Ser75 ↑[10.91] (1)                                                                                                                                                                       |
| E9PTN4     | Srpkl    | SRSF protein kinase 1                                  | Ser51 ↑[3.40] (2), Ser309 ↑[AR] (2), Ser311 ↑[AR] (2)                                                                                                                                    |
| A0A0G2JX62 | Srpk2    | SRSF protein kinase 2                                  | Ser487 ↑[AR] (2), Thr491 ↑[AR] (2)                                                                                                                                                       |
| B1WBQ5     | Stk3     | serine/threonine kinase 3                              | Ser316 ↑[29.15] (1)                                                                                                                                                                      |
| F1LRI6     | Taok3    | TAO kinase 3                                           | Ser324 ↑[AR] (1)                                                                                                                                                                         |
| D3ZWV8     | Tiam1    | T-cell lymphoma invasion and metastasis 1              | Ser725 ↑[AR] (1), Ser1462 ↑[AR] (2)                                                                                                                                                      |
| F1LPP2     | Tlk2     | tousled-like kinase 2                                  | Ser749 ↑[AR] (1)                                                                                                                                                                         |

|            |        |                                             |                                                                                                                      |
|------------|--------|---------------------------------------------|----------------------------------------------------------------------------------------------------------------------|
| D3ZZQ0     | Tnik   | TRAF2 and NCK interacting kinase            | Ser640 ↑[15.17] ( _1), Ser678 ↑[AR] ( _2), Ser680 ↑[AR] ( _2), Ser769 ↑[AR] ( _1)                                    |
| F7ESX8     | Trim24 | tripartite motif-containing 24              | Ser183 ↑[29.79] ( _2), Ser190 ↑[29.79] ( _2), Ser267 ↑[AR] ( _1)                                                     |
| O08629     | Trim28 | tripartite motif-containing 28              | Ser27 ↑[AR] ( _2), Ser52 ↑[AR] ( _1), Ser502 ↑[AR] ( _1), Ser595 ↑[AR] ( _2) ↓[-46.22] ( _3), Ser597 ↓[-38.19] ( _3) |
| A0A1P0PBZ6 | Trio   | trio Rho guanine nucleotide exchange factor | Ser2408 ↑[AR] ( _2), Ser2412 ↑[AR] ( _2)                                                                             |
| Q9Z136     | Tsc1   | tuberous sclerosis 1                        | Ser561 ↑[AR] ( _2), Ser565 ↑[AR] ( _2)                                                                               |
| D3ZMG0     | Ulk1   | unc-51 like autophagy activating kinase 1   | Ser757 ↑[AR] ( _2)                                                                                                   |
| Q66HC2     | Vrk3   | vaccinia related kinase 3                   | Ser82 ↑[11.18] ( _3), Ser83 ↑[11.18] ( _3), Ser85 ↑[11.18] ( _3), Thr88 ↓[C] ( _3)                                   |
| Q63802     | Wee1   | WEE1 G2 checkpoint kinase                   | Ser78 ↑[AR] ( _2), Ser85 ↑[AR] ( _2)                                                                                 |
| A0A0G2K3A0 | Wnk1   | WNK lysine deficient protein kinase 1       | Ser2154 ↑[AR] ( _1)                                                                                                  |
| D3ZMJ7     | Wnk2   | WNK lysine deficient protein kinase 2       | Ser45 ↑[AR] ( _1), Ser1774 ↑[AR] ( _1), Ser1830 ↑[16.53] ( _2), Ser1831 ↑[16.53] ( _2)                               |
| A0A1W2Q6C5 | Wnk3   | WNK lysine deficient protein kinase 3       | Ser436 ↑[AR] ( _3), Thr449 ↑[AR] ( _3)                                                                               |

↑, elevated phosphorylation; ↓, decreased phosphorylation; ↓[C], detected only in control (negative siRNA-treated) cells; ↓[AR], detected only in β-arrestin2-deficient cells; ( \_1, \_2, \_3), multiplicity

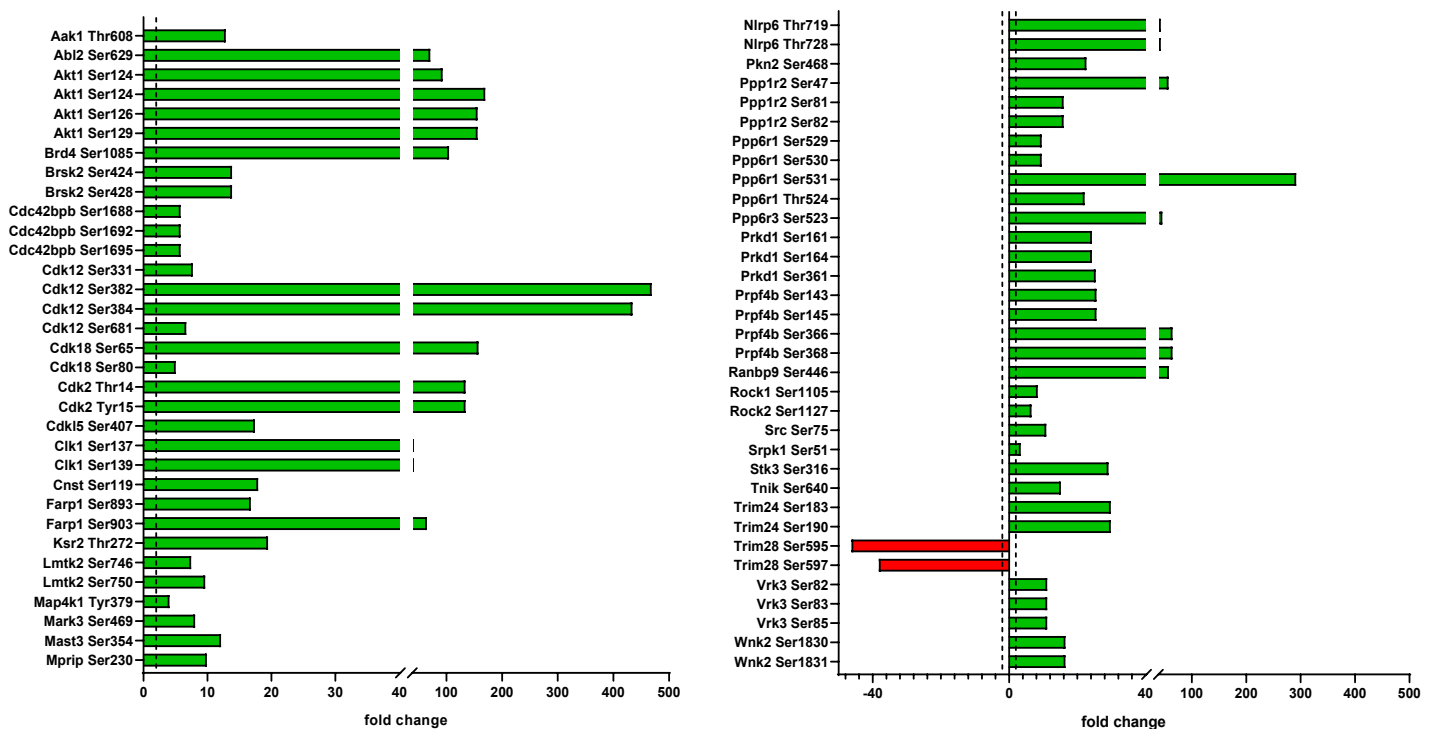

**Figure S12.** Quantitative changes in phosphoproteins involved in the regulation of MAP-mediated signaling in GH1 cells after after siRNA-mediated β-arrestin2 knockdown.

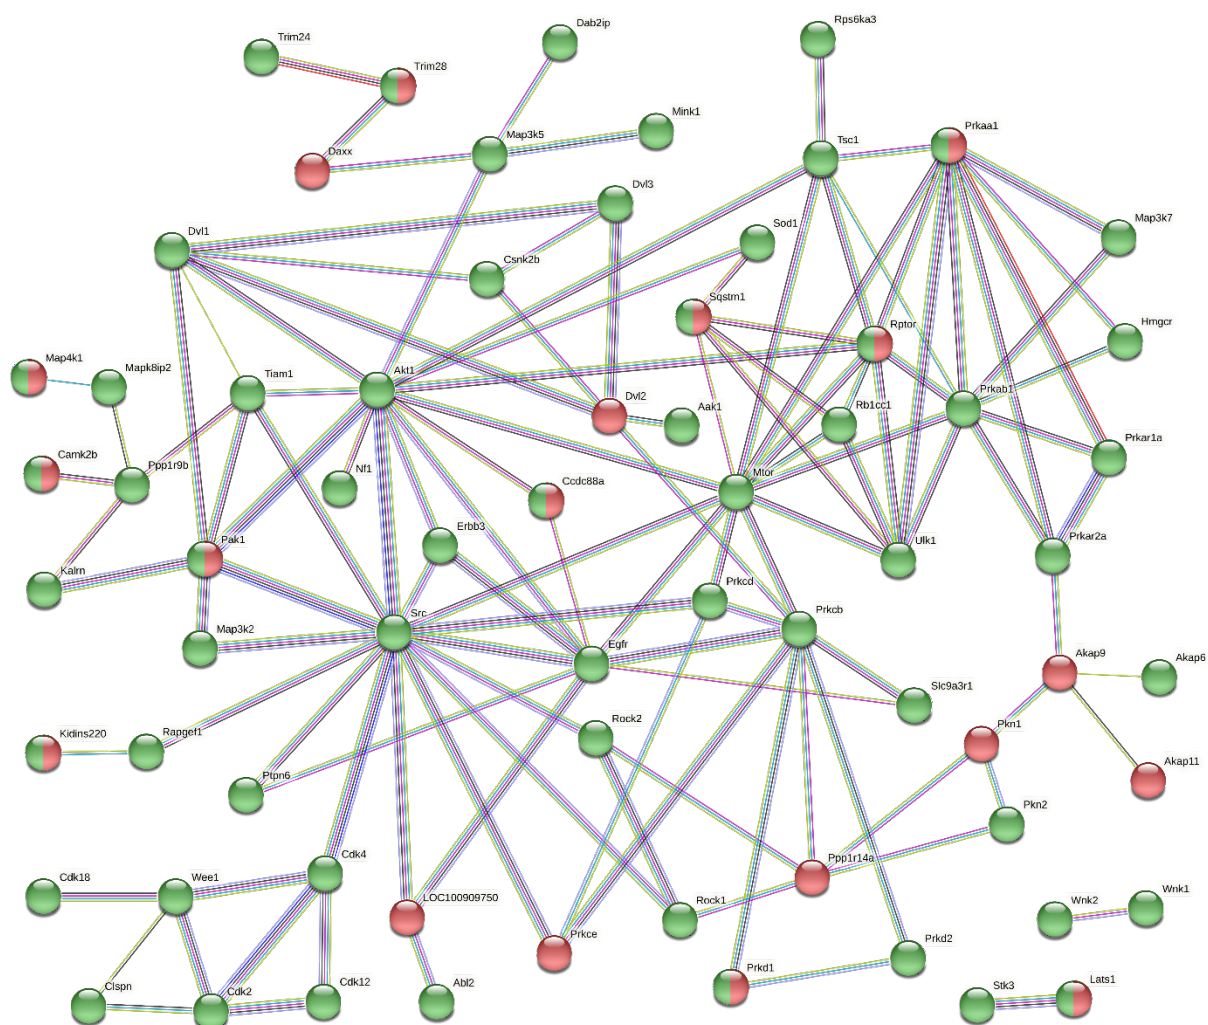

**Figure S13.** A network of differentially phosphorylated proteins involved in the regulation of MAP-mediated signaling in GH1 cells after siRNA-mediated  $\beta$ -arrestin2 knockdown. Elevated phosphorylation in green, decreased phosphorylation in red.

**Table S7.** A list of differentially phosphorylated proteins involved in MAP kinase-mediated signaling in GH1 cells after stimulation with 1  $\mu$ M TRH

| Uniprot ID | Gene ID      | Gene name                                           | Phosphorylated regions                                                                                                                         |
|------------|--------------|-----------------------------------------------------|------------------------------------------------------------------------------------------------------------------------------------------------|
| F1LRI7     | Aak1         | AP2 associated kinase 1                             | Ser626 $\uparrow$ [TRH] ( $\_2$ )                                                                                                              |
| F1LPB4     | Akap9        | A-kinase anchoring protein 9                        | Ser858 $\downarrow$ [C] ( $\_3$ ), Thr864 $\downarrow$ [C] ( $\_3$ ), Thr865 $\downarrow$ [C] ( $\_3$ ), Ser1501 $\downarrow$ [C] ( $\_1$ )    |
| F1LR81     | Akap11       | A-kinase anchoring protein 11                       | Ser434 $\downarrow$ [C] ( $\_3$ ), Ser439 $\downarrow$ [C] ( $\_3$ ), Ser440 $\downarrow$ [C] ( $\_3$ )                                        |
| P47196     | Akt1         | AKT serine/threonine kinase 1                       | Ser126 $\downarrow$ [C] ( $\_1$ ) $\uparrow$ [TRH] ( $\_2$ )                                                                                   |
| A0A0G2K3I0 | Atm          | ATM serine/threonine kinase                         | Tyr2839 $\downarrow$ [C] ( $\_1$ )                                                                                                             |
| O70239     | Axin1        | axin 1                                              | Ser75 $\downarrow$ [C] ( $\_3$ ), Ser77 $\downarrow$ [C] ( $\_3$ ), Thr79 $\downarrow$ [C] ( $\_3$ )                                           |
| F1M9C3     | Braf         | B-Raf proto-oncogene, serine/threonine kinase       | Ser94 $\downarrow$ [C] ( $\_1$ )                                                                                                               |
| A0A0G2JYV0 | Brd4         | bromodomain containing 4                            | Ser1071 $\downarrow$ [C] ( $\_3$ ), Ser1077 $\downarrow$ [C] ( $\_3$ )                                                                         |
| D3ZML2     | Brsk2        | BR serine/threonine kinase 2                        | Ser424 $\downarrow$ [C] ( $\_2$ ), Ser428 $\downarrow$ [C] ( $\_2$ ) $\downarrow$ [C] ( $\_3$ ), Ser436 $\downarrow$ [C] ( $\_3$ )             |
| F1LNI8     | Camk2b       | calcium/calmodulin-dependent protein kinase II beta | Thr361 $\downarrow$ [-2.68] ( $\_3$ )                                                                                                          |
| D3ZYD7     | Ccdc88a      | coiled coil domain containing 88A                   | Ser1319 $\downarrow$ [C] ( $\_1$ )                                                                                                             |
| A1LIL5     | Ccnk         | cyclin K                                            | Ser348 $\downarrow$ [C] ( $\_1$ )                                                                                                              |
| P35426     | Cdk4         | cyclin-dependent kinase 4                           | Ser300 $\uparrow$ [TRH] ( $\_1$ )                                                                                                              |
| A0A0G2K5U7 | Cdk12        | cyclin-dependent kinase 12                          | Ser273 $\downarrow$ [C] ( $\_2$ ), Ser275 $\downarrow$ [C] ( $\_2$ ), Ser332 $\downarrow$ [C] ( $\_2$ )                                        |
| D3ZKK3     | Cnst         | consortin, connexin sorting protein                 | Ser117 $\downarrow$ [C] ( $\_1$ )                                                                                                              |
| Q6MGC8     | Daxx         | death-domain associated protein                     | Ser526 $\downarrow$ [-7.22] ( $\_2$ ), Ser550 $\uparrow$ [TRH] ( $\_3$ ), Ser553 $\uparrow$ [TRH] ( $\_3$ ), Ser556 $\uparrow$ [TRH] ( $\_3$ ) |
| A0A0G2KB92 | Dclk1        | doublecortin-like kinase 1                          | Ser363 $\downarrow$ [C] ( $\_2$ ), Ser364 $\downarrow$ [C] ( $\_2$ ), Ser364 $\downarrow$ [C] ( $\_1$ )                                        |
| F1LRS2     | Dock7        | dedicator of cytokinesis 7                          | Ser904 $\downarrow$ [C] ( $\_3$ ), Ser906 $\downarrow$ [C] ( $\_2$ ), Ser918 $\downarrow$ [C] ( $\_2$ )                                        |
| Q9WVB9     | Dvl1         | dishevelled segment polarity protein 1              | Ser194 $\uparrow$ [TRH] ( $\_1$ )                                                                                                              |
| D4ADV8     | Dvl3         | dishevelled segment polarity protein 3              | Ser125 $\downarrow$ [C] ( $\_1$ )                                                                                                              |
| D4A0G9     | Ercc6        | ERCC excision repair 6, chromatin remodeling factor | Ser1014 $\downarrow$ [C] ( $\_1$ )                                                                                                             |
| D3ZAL7     | Gab1         | GRB2-associated binding protein 1                   | Ser438 $\downarrow$ [C] ( $\_2$ )                                                                                                              |
| A0A0G2K2T6 | Ilf3         | interleukin enhancer binding factor 3               | Ser482 $\uparrow$ [TRH] ( $\_1$ )                                                                                                              |
| Q9EQG6     | Kidins220    | kinase D-interacting substrate 220                  | Ser1585 $\downarrow$ [C] ( $\_2$ ), Ser1673 $\downarrow$ [C] ( $\_1$ )                                                                         |
| F1M2K4     | Lats1        | large tumor suppressor kinase 1                     | Ser1111 $\downarrow$ [C] ( $\_1$ )                                                                                                             |
| D3ZBH5     | Lmtk2        | lemur tyrosine kinase 2                             | Ser496 $\downarrow$ [C] ( $\_2$ )                                                                                                              |
| F1M0A6     | LOC100909750 | tyrosine-protein kinase ABL1-like                   | Ser798 $\downarrow$ [C] ( $\_3$ ), Thr807 $\downarrow$ [C] ( $\_3$ )                                                                           |
| A0A0G2K3R1 | Map3k4       | mitogen activated protein kinase kinase kinase 4    | Ser59 $\downarrow$ [C] ( $\_3$ ) $\downarrow$ [C] ( $\_2$ ), Ser77 $\downarrow$ [C] ( $\_3$ ) $\downarrow$ [C] ( $\_2$ )                       |

|            |          |                                                              |                                                                                                           |
|------------|----------|--------------------------------------------------------------|-----------------------------------------------------------------------------------------------------------|
| D3Z8I4     | Map4k1   | mitogen activated protein kinase kinase kinase 1             | Ser370 ↓[C] (2), Ser373 ↓[C] (2), Ser375 ↓[C] (2), Tyr379 ↓[C] (2)                                        |
| G3V9M2     | Mapk8ip2 | mitogen-activated protein kinase 8 interacting protein 2     | Ser254 ↑[TRH] (2), Ser257 ↓[C] (1)                                                                        |
| A0A0G2JSU4 | Ndrp2    | NDRG family member 2                                         | Ser336 ↓[C] (3)                                                                                           |
| P35465     | Pak1     | p21 (RAC1) activated kinase 1                                | Ser174 ↓[-5.65] (1), Ser219 ↓[C] (1), Thr228 ↓[C] (1)                                                     |
| A0A0H2UHA0 | Ppp1r2   | protein phosphatase 1, regulatory (inhibitor) subunit 2      | Ser81 ↓[C] (3), Ser90 ↓[C] (3)                                                                            |
| D3ZG37     | Ppp6r1   | protein phosphatase 6, regulatory subunit 1                  | Thr524 ↓[C] (2)                                                                                           |
| D3ZBT9     | Ppp6r3   | protein phosphatase 6, regulatory subunit 3                  | Thr518 ↓[C] (3), Ser524 ↓[C] (2), Ser525 ↓[C] (2) ↑[TRH] (3)                                              |
| P54645     | Prkaa1   | protein kinase AMP-activated catalytic subunit alpha 1       | Ser486 ↓[-13.17] (2)                                                                                      |
| F1LMV8     | Prkce    | protein kinase C, epsilon                                    | Ser140 ↓[-14.81] (2)                                                                                      |
| A0A0G2K928 | Prkd1    | protein kinase D1                                            | Ser189 ↓[C] (2), Ser192 ↓[C] (2), Ser361 ↓[C] (2), Ser361 ↓[C] (1), Thr364 ↓[C] (2)                       |
| Q5RKH1     | Prpf4b   | pre-mRNA processing factor 4B                                | Ser21 ↓[C] (3) ↑[TRH] (2), Ser24 ↓[C] (3) ↑[TRH] (2), Ser33 ↓[C] (3)                                      |
| P70600     | Ptk2b    | protein tyrosine kinase 2 beta                               | Ser389 ↓[C] (3), Ser392 ↓[C] (3), Ser394 ↓[C] (3), Ser396 ↓[C] (3), Ser399 ↓[C] (3)                       |
| F1LQT3     | Rock2    | Rho-associated coiled-coil containing protein kinase 2       | Ser1124 ↑[TRH] (2) ↑[TRH] (1)                                                                             |
| A0A0G2KB60 | Rps6kc1  | ribosomal protein S6 kinase C1                               | Ser603 ↓[C] (2)                                                                                           |
| D3ZDU2     | Rptor    | regulatory associated protein of MTOR, complex 1             | Thr857 ↑[TRH] (2), Ser859 ↓[C] (2)                                                                        |
| G3V7X2     | Scg2     | secretogranin II                                             | Ser491 ↑[TRH] (1), Ser494 ↑[TRH] (1), Ser495 ↓[-3.50] (1)                                                 |
| G3V7I8     | Slk      | STE20-like kinase                                            | Ser348 ↓[C] (2)                                                                                           |
| E9PSJ4     | Spag9    | sperm associated antigen 9                                   | Ser719 ↓[-14.77] (2)                                                                                      |
| O08623     | Sqstm1   | sequestosome 1                                               | Ser364 ↓[C] (1)                                                                                           |
| E9PTN4     | Srpkl    | SRSF protein kinase 1                                        | Ser33 ↓[C] (3), Ser37 ↓[C] (3), Ser39 ↓[C] (3), Ser51 ↓[C] (3) ↓[C] (2), Thr453 ↓[C] (2), Ser455 ↓[C] (2) |
| A0A0G2K7Z9 | Stk10    | serine/threonine kinase 10                                   | Thr 456 ↓[C] (1)                                                                                          |
| F7ESX8     | Trim24   | tripartite motif-containing 24                               | Ser294 ↓[C] (1)                                                                                           |
| O08629     | Trim28   | tripartite motif-containing 28                               | Ser27 ↑[TRH] (2), Ser31 ↓[-18.62] (2) ↓[C] (1)                                                            |
| A0A0G2K3A0 | Wnk1     | WNK lysine deficient protein kinase 1                        | Ser1809 ↓[C] (2)                                                                                          |
| D3ZMJ7     | Wnk2     | WNK lysine deficient protein kinase 2                        | Ser45 ↑[TRH] (1), Ser49 ↓[C] (1), Ser1830 ↓[C] (2), Ser1831 ↓[C] (2)                                      |
| D4AE17     | Zak      | sterile alpha motif and leucine zipper containing kinase AZK | Ser434 ↓[C] (2), Ser452 ↓[C] (2)                                                                          |
| A0A0G2K8T6 | Zeb2     | zinc finger E-box binding homeobox 2                         | Ser517 ↓[C] (3), Thr522 ↓[C] (3)                                                                          |

↑, elevated phosphorylation; ↓, decreased phosphorylation; ↓[C], detected only in control (negative siRNA-treated) cells; ↑[TRH], detected only in cells stimulated with TRH; ( \_1, \_2, \_3), multiplicity

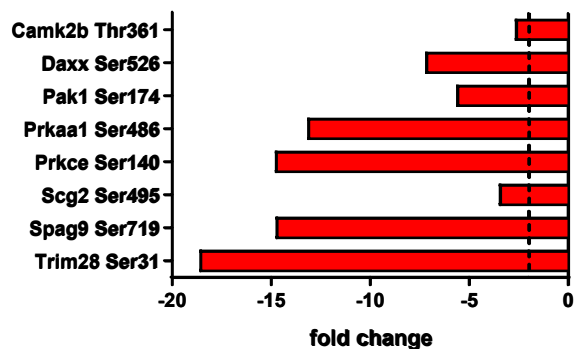

**Figure S14.** Quantitative changes in phosphoproteins involved in the regulation of MAP-mediated signaling in GH1 cells after stimulation with 1  $\mu$ M TRH.

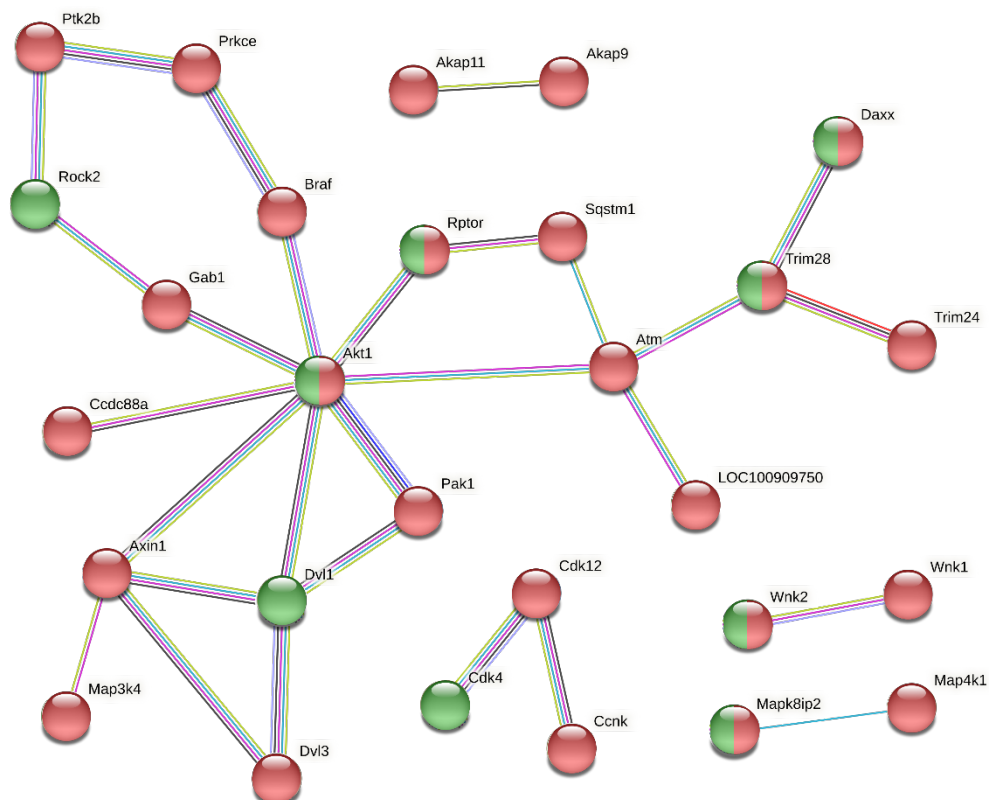

**Figure S15.** A network of differentially phosphorylated proteins involved in the regulation of MAP-mediated signaling in GH1 cells after TRH treatment. Elevated phosphorylation in green, decreased phosphorylation in red.

**Table S8.** A list of differentially phosphorylated proteins involved in MAP kinase-mediated signaling in GH1 cells after stimulation with 1  $\mu$ M TAL

| Uniprot ID | Gene ID | Gene name                                                         | Phosphorylated regions                                                                                                            |
|------------|---------|-------------------------------------------------------------------|-----------------------------------------------------------------------------------------------------------------------------------|
| F1LRI7     | Aak1    | AP2 associated kinase 1                                           | Thr622 ↓[-125.55] (2)                                                                                                             |
| F1LPB4     | Akap9   | A-kinase anchoring protein 9                                      | Ser858 ↓[C] (3), Ser862 ↓[-6.60] (2), Thr864 ↓[C] (3), Thr865 ↓[-6.60] (2) ↓[C] (3), Ser1500 ↓[-10.14] (1), Ser1501 ↓[-10.14] (1) |
| P47196     | Akt1    | AKT serine/threonine kinase 1                                     | Ser124 ↓[-5.22] (1), Ser126 ↓[-363.47] (1)                                                                                        |
| A0A0G2K3I0 | Atm     | ATM serine/threonine kinase                                       | Tyr2839 ↓[C] (1)                                                                                                                  |
| Q64542     | Atp2b4  | ATPase plasma membrane Ca <sup>2+</sup> transporting 4            | Ser1151 ↓[C] (1)                                                                                                                  |
| O70239     | Axin1   | axin 1                                                            | Ser75 ↓[C] (3), Ser77 ↓[C] (3), Thr79 ↓[C] (3)                                                                                    |
| F1M9C3     | Braf    | B-Raf proto-oncogene, serine/threonine kinase                     | Ser94 ↓[C] (1)                                                                                                                    |
| A0A0G2JYV0 | Brd4    | bromodomain containing 4                                          | Ser1071 ↓[C] (3), Ser1077 ↓[C] (3)                                                                                                |
| D3ZML2     | Brsk2   | BR serine/threonine kinase 2                                      | Ser424 ↓[C] (2), Ser428 ↓[C] (3) ↓[C] (2), Ser436 ↓[C] (3)                                                                        |
| A0A0G2K5C0 | Camsap3 | calmodulin regulated spectrin-associated protein family, member 3 | Ser320 ↓[C] (1) ↑[TAL] (2)                                                                                                        |
| D3ZYD7     | Ccdc88a | coiled coil domain containing 88A                                 | Ser1319 ↓[C] (1)                                                                                                                  |
| A1L1L5     | Ccnk    | cyclin K                                                          | Ser348 ↓[C] (1)                                                                                                                   |
| O70509     | Cd44    | CD44 molecule (Indian blood group)                                | Ser328 ↓[C] (1)                                                                                                                   |
| A0A0G2K5U7 | Cdk12   | cyclin-dependent kinase 12                                        | Ser273 ↓[C] (2), Ser275 ↓[C] (2), Ser331 ↓[-13.39] (2), Ser332 ↓[-20.00] (2), Ser1079 ↓[C] (1)                                    |
| D3ZKK3     | Cnst    | consortin, connexin sorting protein                               | Ser117 ↓[C] (1), Ser119 ↓[-5.65] (1)                                                                                              |
| A0A096MJD3 | Csnk2b  | casein kinase 2 beta                                              | Ser158 ↓[C] (1)                                                                                                                   |
| Q6MGC8     | Daxx    | death domain associated protein                                   | Ser526 ↓[-3.62] (2)                                                                                                               |
| A0A0G2KB92 | Dclk1   | doublecortin-like kinase 1                                        | Ser330 ↓[-12.50] (2), Ser334 ↓[C] (3), Ser337 ↓[C] (2), Ser340 ↓[C] (3), Ser363 ↓[C] (2), Ser364 ↓[C] (2)                         |
| F1LRS2     | Dock7   | dedicator of cytokinesis 7                                        | Ser904 ↓[-5.08] (2), Ser906 ↓[-5.08] (2)                                                                                          |
| Q9WVB9     | Dvl1    | dishevelled segment polarity protein 1                            | Ser194 ↑[TAL] (1)                                                                                                                 |
| D3ZB71     | Dvl2    | dishevelled segment polarity protein 2                            | Ser211 ↓[-8.27] (1)                                                                                                               |
| D4ADV8     | Dvl3    | dishevelled segment polarity protein 3                            | Ser125 ↓[-3.22] (1)                                                                                                               |
| M0R4L1     | ErbB2   | erb-b2 receptor tyrosine kinase 2                                 | Thr152 ↓[-5.36] (2), Ser154 ↓[-5.36] (2)                                                                                          |
| D3ZS47     | Ercc6   | ERCC excision repair 6, chromatin remodeling factor               | Ser405 ↓[-4.30] (2), Ser406 ↓[-4.30] (2)                                                                                          |
| F1LYQ8     | Farp1   | FERM, ARH/RhoGEF and pleckstrin domain protein 1                  | Ser893 ↓[C] (2), Thr902 ↓[-14.79] (2) ↓[-6.76] (3)                                                                                |
| A0A0G2JSH4 | Gsk3b   | glycogen synthase kinase 3 beta                                   | Ser389 ↓[-3.03] (1)                                                                                                               |
| F1MAF1     | Hsf1    | heat shock transcription factor 1                                 | Ser303 ↓[C] (2), Ser307 ↓[C] (2)                                                                                                  |
| A0A0G2K2T6 | Ilf3    | interleukin enhancer binding factor 3                             | Ser482 ↑[TAL] (1)                                                                                                                 |

|            |              |                                                                |                                                                                                                                                       |
|------------|--------------|----------------------------------------------------------------|-------------------------------------------------------------------------------------------------------------------------------------------------------|
| Q9EQG6     | Kidins220    | kinase D-interacting substrate 220                             | Ser1513 ↓[-2.03] ( _2), Ser1518 ↓[-2.06] ( _2), Ser1585 ↓[C] ( _2), Ser1673 ↓[-9.93] ( _1)                                                            |
| F1M2K4     | Lats1        | large tumor suppressor kinase 1                                | Ser1111 ↓[C] ( _1)                                                                                                                                    |
| D3ZBH5     | Lmtk2        | lemur tyrosine kinase 2                                        | Ser496 ↓[C] ( _2), Ser580 ↓[C] ( _2), Ser1334 ↑[TAL] ( _3)                                                                                            |
| F1M0A6     | LOC100909750 | tyrosine-protein kinase ABL1-like                              | Ser801 ↓[C] ( _2)                                                                                                                                     |
| A0A0G2K3R1 | Map3k4       | mitogen activated protein kinase kinase kinase 4               | Ser59 ↓[C] ( _3), Ser59 ↓[-11.89] ( _2), Ser77 ↓[-11.89] ( _2), Ser77 ↓[C] ( _3)                                                                      |
| P0C8E4     | Map3k7       | mitogen activated protein kinase kinase kinase 7               | Ser439 ↓[-5.39] ( _1)                                                                                                                                 |
| D3Z8I4     | Map4k1       | mitogen activated protein kinase kinase kinase 1               | Ser370 ↓[C] ( _2), Tyr379 ↓[C] ( _2)                                                                                                                  |
| G3V9M2     | Mapk8ip2     | mitogen-activated protein kinase 8 interacting protein 2       | Ser254 ↑[TAL] ( _2), Ser257 ↓[-7.28] ( _1)                                                                                                            |
| F1M836     | Mark3        | microtubule affinity regulating kinase 3                       | Ser400 ↓[C] ( _2), Ser469 ↓[-11.09] ( _1)                                                                                                             |
| Q810W7     | Mast1        | microtubule associated serine/threonine kinase 1               | Ser346 ↓[-2.01] ( _1)                                                                                                                                 |
| D3ZL30     | Mast3        | microtubule associated serine/threonine kinase 3               | Ser354 ↓[C] ( _1)                                                                                                                                     |
| A0A0G2JSU4 | Ndrp2        | NDRG family member 2                                           | Ser336 ↓[C] ( _3)                                                                                                                                     |
| P35465     | Pak1         | p21 (RAC1) activated kinase 1                                  | Ser219 ↓[-2.29] ( _1)                                                                                                                                 |
| Q64303     | Pak2         | p21 protein (Cdc42/Rac)-activated kinase 2                     | Ser2 ↓[-10.61] ( _1)                                                                                                                                  |
| A0A0H2UHA0 | Ppp1r2       | protein phosphatase 1, regulatory (inhibitor) subunit 2        | Ser47 ↑[TAL] ( _2) ↓[-5.98] ( _1), Ser49 ↑[TAL] ( _2), Ser81 ↓[C] ( _3), Ser82 ↓[-7.88] ( _1), Ser90 ↓[C] ( _3), Ser135 ↓[C] ( _1)                    |
| Q99MC0     | Ppp1r14a     | protein phosphatase 1, regulatory (inhibitor) subunit 14A      | Ser136 ↓[-5.00] ( _1)                                                                                                                                 |
| D3ZG37     | Ppp6r1       | protein phosphatase 6, regulatory subunit 1                    | Thr524 ↓[-15.15] ( _2), Ser529 ↓[-13.53] ( _3) ↓[-13.05] ( _2), Ser530 ↓[-13.53] ( _3) ↓[-13.05] ( _2), Ser531 ↓[-12.36] ( _2), Ser827 ↓[-4.48] ( _1) |
| D3ZBT9     | Ppp6r3       | protein phosphatase 6, regulatory subunit 3                    | Thr518 ↓[-4.76] ( _3), Ser524 ↓[C] ( _2), Ser525 ↓[C] ( _2)                                                                                           |
| P54645     | Prkaa1       | protein kinase AMP-activated catalytic subunit alpha 1         | Ser486 ↓[-6.03] ( _2)                                                                                                                                 |
| P12369     | Prkar2b      | protein kinase cAMP-dependent type 2 regulatory subunit beta   | Ser83 ↓[C] ( _1), Ser85 ↓[C] ( _1)                                                                                                                    |
| A0A0G2K928 | Prkd1        | protein kinase D1                                              | Ser161 ↓[-4.59] ( _2), Ser164 ↓[-4.59] ( _2), Ser189 ↓[C] ( _2), Ser192 ↓[C] ( _2), Ser361 ↓[C] ( _1)                                                 |
| G3V7J2     | Prkra        | protein activator of interferon induced protein kinase EIF2AK2 | Ser18 ↓[C] ( _1)                                                                                                                                      |
| Q5RKH1     | Prpf4b       | pre-mRNA processing factor 4B                                  | Ser21 ↓[C] ( _3) ↑[TAL] ( _2), Ser24 ↓[C] ( _3) ↑[TAL] ( _2), Ser33 ↓[C] ( _3), Ser143 ↓[-8.10] ( _2), Ser145 ↓[-8.10] ( _2)                          |
| P70600     | Ptk2b        | protein tyrosine kinase 2 beta                                 | Ser389 ↓[C] ( _3), Ser392 ↓[C] ( _3), Ser394 ↓[C] ( _3), Ser396 ↓[C] ( _3), Ser399 ↓[C] ( _3)                                                         |
| F1M8L9     | Rapgef1      | Rap guanine nucleotide exchange factor 1                       | Ser239 ↓[C] ( _2)                                                                                                                                     |



|            |        |                                                              |                                                                                                                                                                                                                |
|------------|--------|--------------------------------------------------------------|----------------------------------------------------------------------------------------------------------------------------------------------------------------------------------------------------------------|
| F1LQT3     | Rock2  | Rho-associated coiled-coil containing protein kinase 2       | Ser1124 ↑[TAL] ( _2) ↑[TAL] ( _1)                                                                                                                                                                              |
| D3ZDU2     | Rptor  | regulatory associated protein of MTOR, complex 1             | Ser859 ↓[-3.12] ( _2)                                                                                                                                                                                          |
| F1LU97     | Sash1  | SAM and SH3 domain containing 1                              | Ser539 ↓[C] ( _2), Ser541 ↓[C] ( _2)                                                                                                                                                                           |
| G3V7X2     | Scg2   | secretogranin II                                             | Ser495 ↓[-4.13] ( _1)                                                                                                                                                                                          |
| E9PSJ4     | Spag9  | sperm associated antigen 9                                   | Ser719 ↓[-8.71] ( _2)                                                                                                                                                                                          |
| O08623     | Sqstm1 | sequestosome 1                                               | Ser354 ↑[TAL] ( _2), Ser364 ↓[C] ( _1)<br>Ser33 ↓[-10.08] ( _3), Ser37 ↓[-10.08] ( _3), Ser39 ↓[-7.44] ( _3), Ser51 ↓[-4.50] ( _2) ↓[-10.08] ( _3), Thr453 ↓[C] ( _2), Ser455 ↓[C] ( _2)                       |
| E9PTN4     | Srpkl  | SRSF protein kinase 1                                        | Ser316 ↓[-13.41] ( _1)<br>Thr456 ↓[-4.56] ( _1)                                                                                                                                                                |
| B1WBQ5     | Stk3   | serine/threonine kinase 3                                    | Ser4 ↓[-13.05] ( _1)                                                                                                                                                                                           |
| A0A0G2K7Z9 | Stk10  | serine/threonine kinase 10                                   | Ser640 ↓[-10.91] ( _1), Ser764 ↓[-5.33] ( _2), Ser769 ↓[-5.33] ( _2)                                                                                                                                           |
| B0LT89     | Stk24  | serine/threonine kinase 24                                   | Ser294 ↓[C] ( _1), Ser320 ↓[-12.00] ( _1)<br>Ser31 ↓[-5.71] ( _1), Ser474 ↓[C] ( _1), Ser595 ↓[-53.08] ( _3), Ser597 ↓[-28.00] ( _3)<br>Ser82 ↓[C] ( _3), Ser83 ↓[C] ( _3), Ser85 ↓[C] ( _3), Thr88 ↓[C] ( _3) |
| D3ZZQ0     | Tnik   | TRAF2 and NCK interacting kinase                             | Ser1809 ↓[C] ( _2)                                                                                                                                                                                             |
| F7ESX8     | Trim24 | tripartite motif-containing 24                               | Ser49 ↓[C] ( _1)                                                                                                                                                                                               |
| O08629     | Trim28 | tripartite motif-containing 28                               | Ser434 ↓[C] ( _2), Ser452 ↓[C] ( _2)                                                                                                                                                                           |
| Q66HC2     | Vrk3   | vaccinia related kinase 3                                    |                                                                                                                                                                                                                |
| A0A0G2K3A0 | Wnk1   | WNK lysine deficient protein kinase 1                        |                                                                                                                                                                                                                |
| D3ZMJ7     | Wnk2   | WNK lysine deficient protein kinase 2                        |                                                                                                                                                                                                                |
| D4AE17     | Zak    | sterile alpha motif and leucine zipper containing kinase AZK |                                                                                                                                                                                                                |

↑, elevated phosphorylation; ↓, decreased phosphorylation; ↓[C], detected only in control (negative siRNA-treated) cells; ↑[TAL], detected only in cells stimulated with TAL; ( \_1, \_2, \_3), multiplicity

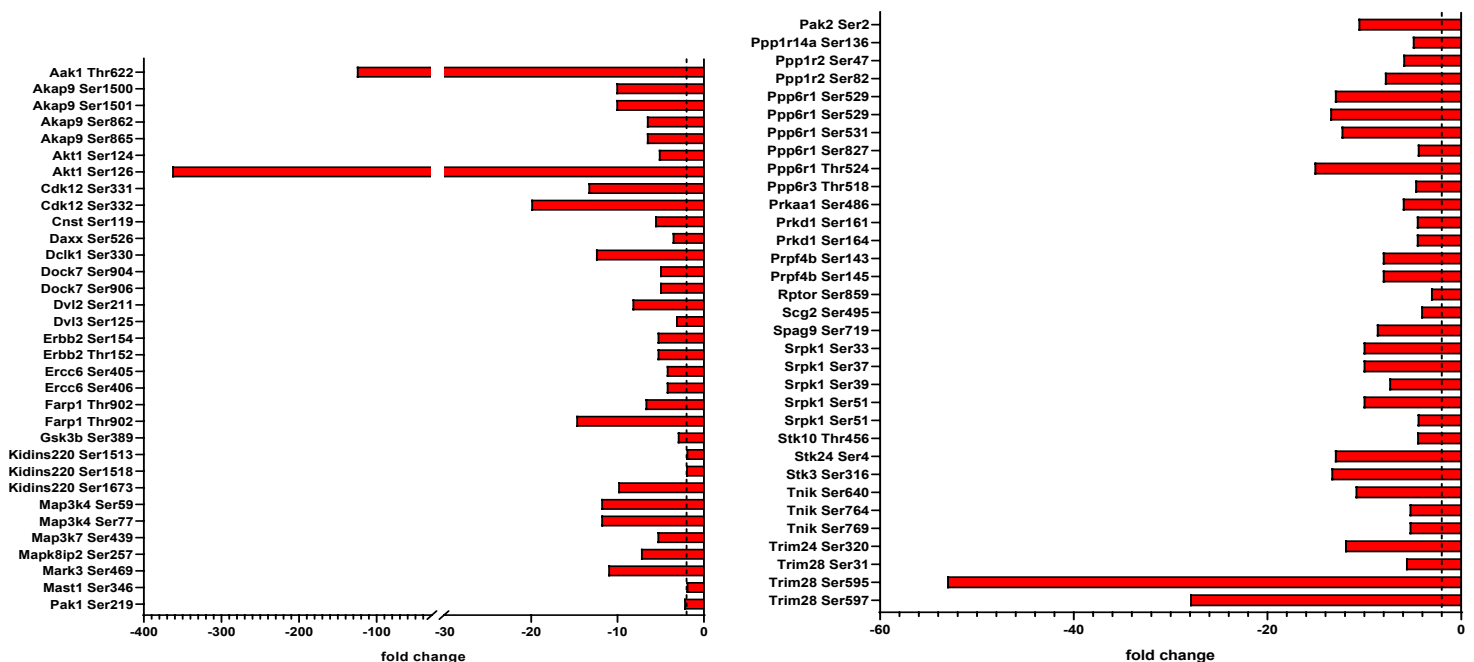

**Figure S16.** Quantitative changes in phosphoproteins involved in the regulation of MAP-mediated signaling in GH1 cells after TAL treatment.

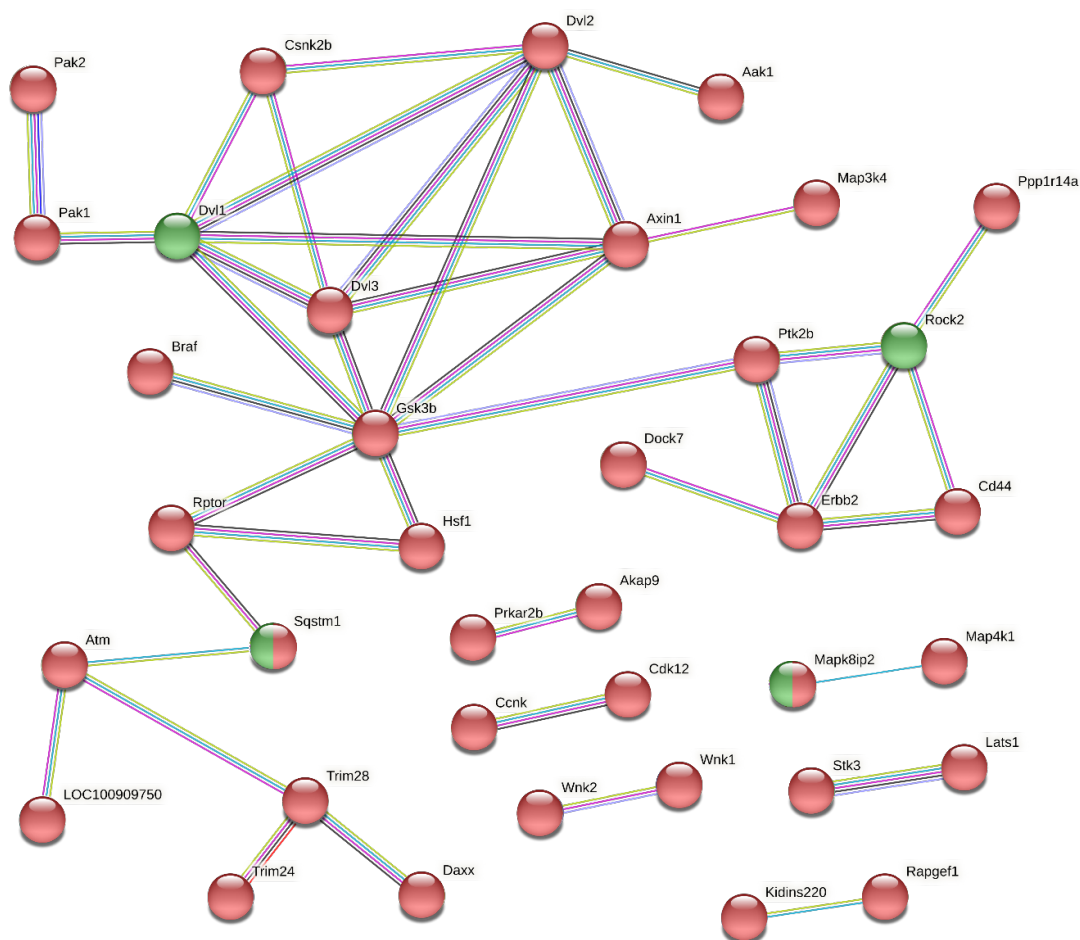

**Figure S17.** A network of differentially phosphorylated proteins involved in the regulation of MAP-mediated signaling in GH1 cells after TAL treatment. Elevated phosphorylation in green, decreased phosphorylation in red.

**Table S9.** A list of differentially phosphorylated proteins involved in MAP kinase-mediated signaling in GH1 cells after siRNA-mediated  $\beta$ -arrestin2 knockdown and stimulation with 1  $\mu$ M TRH

| Uniprot ID | Gene ID      | Gene name                                                         | Phosphorylated regions                                                                                                                                                                                    |
|------------|--------------|-------------------------------------------------------------------|-----------------------------------------------------------------------------------------------------------------------------------------------------------------------------------------------------------|
| F1LRI7     | Aak1         | AP2 associated kinase 1                                           | Ser626 $\uparrow$ [TRH] ( $_2$ )                                                                                                                                                                          |
| G3V6M0     | Akap6        | A-kinase anchoring protein 6                                      | Ser2208 $\downarrow$ [AR] ( $_2$ )                                                                                                                                                                        |
| F1LR81     | Akap11       | A-kinase anchoring protein 11                                     | Ser434 $\uparrow$ [TRH] ( $_3$ ), Ser439 $\uparrow$ [TRH] ( $_3$ ), Ser440 $\uparrow$ [TRH] ( $_3$ )                                                                                                      |
| F1M3G7     | Akap13       | A-kinase anchoring protein 13                                     | Ser2676 $\uparrow$ [TRH] ( $_2$ )                                                                                                                                                                         |
| P47196     | Akt1         | AKT serine/threonine kinase 1                                     | Ser124 $\downarrow$ [AR] ( $_2$ ), Ser126 $\downarrow$ [AR] ( $_2$ )                                                                                                                                      |
| Q63484     | Akt3         | AKT serine/threonine kinase 3                                     | Ser2 $\downarrow$ [AR] ( $_2$ ), Thr5 $\downarrow$ [AR] ( $_2$ )                                                                                                                                          |
| F1M7M4     | Bmp2k        | BMP-2 inducible kinase                                            | Ser934 $\uparrow$ [TRH] ( $_3$ ), Ser936 $\uparrow$ [TRH] ( $_3$ ), Ser937 $\uparrow$ [TRH] ( $_3$ )                                                                                                      |
| A0A0G2JYV0 | Brd4         | bromodomain containing 4                                          | Ser1071 $\downarrow$ [AR] ( $_3$ ), Ser1077 $\downarrow$ [AR] ( $_3$ ), Ser1085 $\downarrow$ [AR] ( $_3$ )                                                                                                |
| D3ZML2     | Brsk2        | BR serine/threonine kinase 2                                      | Ser428 $\uparrow$ [TRH] ( $_3$ ), Ser436 $\uparrow$ [TRH] ( $_3$ )                                                                                                                                        |
| F1LNI8     | Camk2b       | calcium/calmodulin-dependent protein kinase II beta               | Ser358 $\uparrow$ [TRH] ( $_2$ ), Thr361 $\downarrow$ [AR] ( $_3$ )                                                                                                                                       |
| A0A0G2K5C0 | Camsap3      | calmodulin regulated spectrin-associated protein family, member 3 | Ser320 $\uparrow$ [TRH] ( $_2$ )                                                                                                                                                                          |
| D3ZYD7     | Ccdc88a      | coiled coil domain containing 88A                                 | Ser1319 $\uparrow$ [TRH] ( $_1$ ), Ser1343 $\downarrow$ [AR] ( $_1$ )                                                                                                                                     |
| D4A3G2     | Cdk11b       | cyclin-dependent kinase 11B                                       | Tyr751 $\downarrow$ [AR] ( $_2$ )                                                                                                                                                                         |
| A0A140UHY2 | Cdk16        | cyclin-dependent kinase 16                                        | Ser43 $\uparrow$ [TRH] ( $_2$ ), Ser60 $\uparrow$ [TRH] ( $_2$ )                                                                                                                                          |
| D3ZHC3     | Clspn        | claspin                                                           | Ser77 $\downarrow$ [AR] ( $_3$ )                                                                                                                                                                          |
| D3ZKK3     | Cnst         | consortin, connexin sorting protein                               | Ser117 $\uparrow$ [TRH] ( $_1$ )                                                                                                                                                                          |
| Q63768     | Crk          | CRK proto-oncogene, adaptor protein                               | Ser41 $\uparrow$ [TRH] ( $_1$ )                                                                                                                                                                           |
| Q6MGC8     | Daxx         | death-domain associated protein                                   | Ser521 $\uparrow$ [TRH] ( $_2$ ), Ser526 $\uparrow$ [TRH] ( $_2$ )                                                                                                                                        |
| A0A0G2KB92 | Dclk1        | doublecortin-like kinase 1                                        | Ser334 $\downarrow$ [AR] ( $_3$ ), Ser340 $\downarrow$ [AR] ( $_3$ ) $\uparrow$ [TRH] ( $_1$ )                                                                                                            |
| F1LMD9     | Gak          | cyclin G associated kinase                                        | Ser824 $\uparrow$ [TRH] ( $_2$ ), Ser827 $\uparrow$ [TRH] ( $_2$ )                                                                                                                                        |
| D3ZUP4     | Gpatch2l     | G patch domain containing 2-like                                  | Ser86 $\uparrow$ [TRH] ( $_2$ ), Ser88 $\uparrow$ [TRH] ( $_2$ )                                                                                                                                          |
| A0A0G2JSH4 | Gsk3b        | glycogen synthase kinase 3 beta                                   | Ser389 $\downarrow$ [AR] ( $_1$ )                                                                                                                                                                         |
| P51639     | Hmgcr        | 3-hydroxy-3-methylglutaryl-CoA reductase                          | Ser356 $\downarrow$ [AR] ( $_2$ )                                                                                                                                                                         |
| A0A0G2K2T6 | Ilf3         | interleukin enhancer binding factor 3                             | Thr67 $\downarrow$ [AR] ( $_1$ )                                                                                                                                                                          |
| Q9EQG6     | Kidins220    | kinase D-interacting substrate 220                                | Ser1513 $\uparrow$ [TRH] ( $_2$ ), Ser1518 $\uparrow$ [TRH] ( $_2$ )                                                                                                                                      |
| F1M2K4     | Lats1        | large tumor suppressor kinase 1                                   | Ser1111 $\uparrow$ [TRH] ( $_1$ )                                                                                                                                                                         |
| D3ZBH5     | Lmtk2        | lemur tyrosine kinase 2                                           | Ser576 $\downarrow$ [AR] ( $_2$ ), Ser746 $\uparrow$ [TRH] ( $_1$ ), Ser756 $\downarrow$ [AR] ( $_2$ ) $\downarrow$ [AR] ( $_1$ ), Ser1035 $\downarrow$ [AR] ( $_1$ ), Ser1524 $\downarrow$ [AR] ( $_2$ ) |
| F1M0A6     | LOC100909750 | tyrosine-protein kinase ABL 1-like                                | Ser798 $\uparrow$ [TRH] ( $_3$ )                                                                                                                                                                          |
| F1M9D0     | Map3k2       | mitogen activated protein kinase kinase 2                         | Ser135 $\uparrow$ [TRH] ( $_1$ ), Thr337 $\downarrow$ [AR] ( $_2$ )                                                                                                                                       |
| A0A0G2K3R1 | Map3k4       | mitogen activated protein kinase kinase 4                         | Ser59 $\downarrow$ [AR] ( $_2$ )                                                                                                                                                                          |

|            |          |                                                          |                                                                                        |
|------------|----------|----------------------------------------------------------|----------------------------------------------------------------------------------------|
| P0C8E4     | Map3k7   | mitogen activated protein kinase kinase kinase 7         | Ser454 ↑[TRH] ( _ 2)                                                                   |
| A0A0G2JUN9 | Map3k9   | mitogen-activated protein kinase kinase kinase 9         | Ser541 ↓[AR] ( _ 2)                                                                    |
| G3V9M2     | Mapk8ip2 | mitogen-activated protein kinase 8 interacting protein 2 | Ser254 ↓[AR] ( _ 2)                                                                    |
| A0A0G2K6X6 | Mark2    | microtubule affinity regulating kinase 2                 | Ser567 ↑[TRH] ( _ 1)                                                                   |
| Q810W7     | Mast1    | microtubule associated serine/threonine kinase 1         | Ser346 ↓[AR] ( _ 1)                                                                    |
| A0A0G2JSU4 | Ndrp2    | NDRG family member 2                                     | Ser336 ↑[TRH] ( _ 3)                                                                   |
| P35465     | Pak1     | p21 (RAC1) activated kinase 1                            | Thr184 ↓[AR] ( _ 1), Ser219 ↓[AR] ( _ 1), Ser222 ↓[AR] ( _ 1)                          |
| D3ZQ51     | Pak6     | p21 (RAC1) activated kinase 6                            | Ser328 ↓[AR] ( _ 1)                                                                    |
| Q63433     | Pkn1     | protein kinase N1                                        | Ser920 ↑[TRH] ( _ 1)                                                                   |
| A0A0H2UHA0 | Ppp1r2   | protein phosphatase 1, regulatory (inhibitor) subunit 2  | Ser47 ↓[AR] ( _ 1), Ser82 ↓[AR] ( _ 1), Ser135 ↓[AR] ( _ 1)                            |
| D3ZBT9     | Ppp6r3   | protein phosphatase 6, regulatory subunit 3              | Ser524 ↓[AR] ( _ 2), Ser525 ↓[AR] ( _ 2)                                               |
| P54645     | Prkaa1   | protein kinase AMP-activated catalytic subunit alpha 1   | Thr526 ↑[TRH] ( _ 2)                                                                   |
| A0A0G2K5Q0 | Prkcb    | protein kinase C, beta                                   | Ser643 ↑[TRH] ( _ 2)                                                                   |
| F1LMV8     | Prkce    | protein kinase C, epsilon                                | Ser140 ↑[TRH] ( _ 2), Ser148 ↑[TRH] ( _ 2)                                             |
| A0A0G2K928 | Prkd1    | protein kinase D1                                        | Ser361 ↑[TRH] ( _ 2), Thr364 ↑[TRH] ( _ 2)                                             |
| Q5RKH1     | Prpf4b   | pre-mRNA processing factor 4B                            | Ser21 ↑[TRH] ( _ 3), Ser24 ↑[TRH] ( _ 3), Ser33 ↑[TRH] ( _ 3)                          |
| P97887     | Psen1    | presenilin 1                                             | Ser366 ↑[TRH] ( _ 2), Ser368 ↑[TRH] ( _ 3), Thr371 ↑[TRH] ( _ 3), Ser372 ↑[TRH] ( _ 3) |
| Q66HJ7     | Ptpa     | protein tyrosine phosphatase, receptor type, A           | Tyr465 ↑[TRH] ( _ 1)                                                                   |
| F1LVV3     | Ranbp9   | RAN binding protein 9                                    | Ser459 ↓[AR] ( _ 1)                                                                    |
| F1LQT3     | Rock2    | Rho-associated coiled-coil containing protein kinase 2   | Ser1124 ↓[AR] ( _ 1) ↓[AR] ( _ 2)                                                      |
| D3Z8E0     | Rps6ka3  | ribosomal protein S6 kinase A3                           | Thr365 ↑[TRH] ( _ 2), Ser369 ↑[TRH] ( _ 2)                                             |
| D3ZDU2     | Rptor    | regulatory associated protein of MTOR, complex 1         | Thr857 ↓[AR] ( _ 2), Ser859 ↑[TRH] ( _ 2)                                              |
| F1LU97     | Sash1    | SAM and SH3 domain containing 1                          | Ser534 ↓[AR] ( _ 2), Ser541 ↑[TRH] ( _ 2)                                              |
| G3V7X2     | Scg2     | secretogranin II                                         | Ser491 ↑[TRH] ( _ 1), Ser494 ↑[TRH] ( _ 1)                                             |
| Q9JJ19     | Slc9a3r1 | SLC9A3 regulator 1                                       | Ser287 ↓[AR] ( _ 1)                                                                    |
| Q9WUD9     | Src      | SRC proto-oncogene, non-receptor tyrosine kinase         | Ser75 ↓[AR] ( _ 1)                                                                     |
| E9PTN4     | Srpkl    | SRSF protein kinase 1                                    | Ser51 ↓[AR] ( _ 2)                                                                     |
| A0A0G2JX62 | Srpk2    | SRSF protein kinase 2                                    | Ser310 ↓[AR] ( _ 1)                                                                    |
| D3ZWV8     | Tiam1    | T-cell lymphoma invasion and metastasis 1                | Ser1462 ↓[AR] ( _ 2)                                                                   |
| F7ESX8     | Trim24   | tripartite motif-containing 24                           | Ser293 ↑[TRH] ( _ 1)                                                                   |
| O08629     | Trim28   | tripartite motif-containing 28                           | Ser27 ↑[8.11] ( _ 2), Ser595 ↓[AR] ( _ 2) ↑[59.54] ( _ 3)                              |

|        |       |                                       |                                                      |
|--------|-------|---------------------------------------|------------------------------------------------------|
| Q9Z136 | Tsc1  | tuberous sclerosis 1                  | Ser561 ↓[AR] (_2), Ser565 ↓[AR] (_2)                 |
| D3ZN60 | Ttbk2 | tau tubulin kinase 2                  | Ser755 ↓[AR] (_2)                                    |
| Q66HC2 | Vrk3  | vaccinia related kinase 3             | Ser82 ↓[AR] (_3), Ser83 ↓[AR] (_3), Ser85 ↓[AR] (_3) |
| D3ZMJ7 | Wnk2  | WNK lysine deficient protein kinase 2 | Ser49 ↓[AR] (_1)                                     |

↑, elevated phosphorylation; ↓, decreased phosphorylation; ↓[AR], detected only in  $\beta$ -arrestin2-deficient cells; ↑[TRH], detected only in  $\beta$ -arrestin2-deficient cells stimulated with TRH; (\_1, \_2, \_3), multiplicity

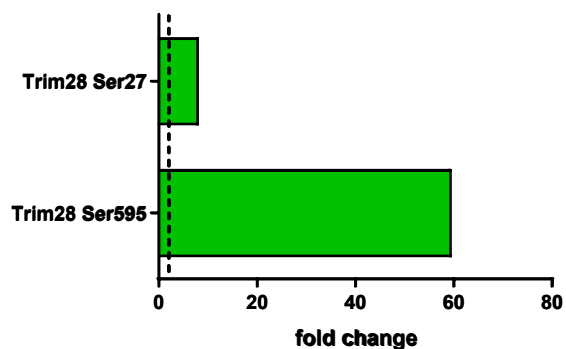

**Figure S18.** Quantitative changes in phosphoproteins involved in the regulation of MAP-mediated signaling in  $\beta$ -arrestin2-deficient GH1 cells after TRH treatment.

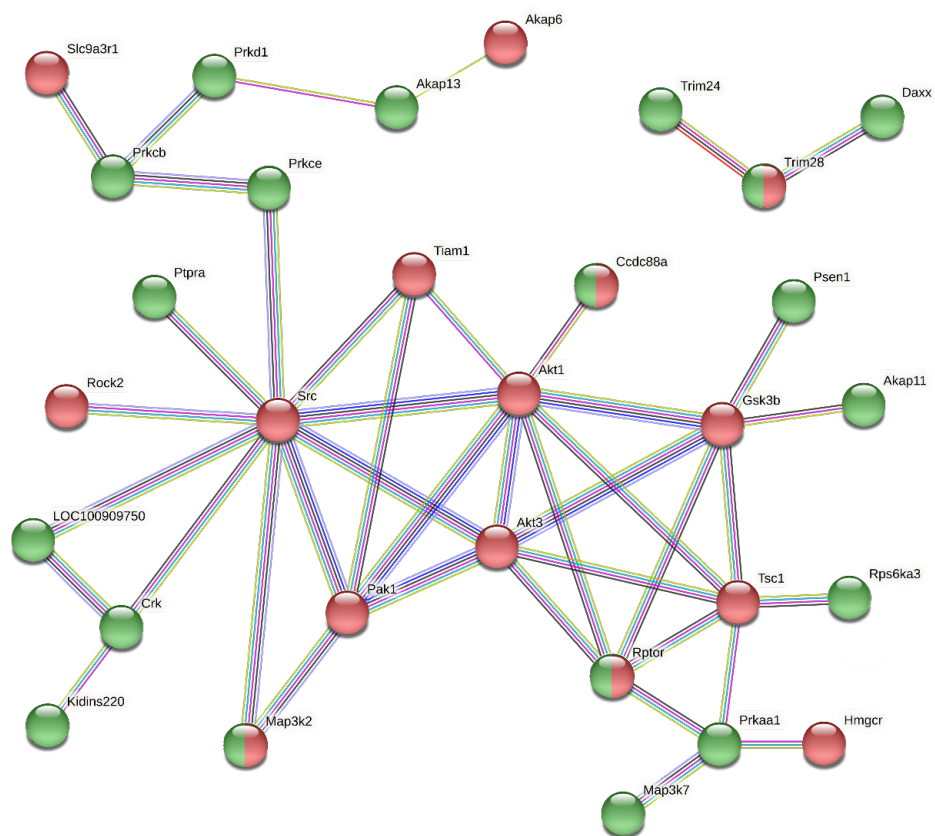

**Figure S19.** A network of differentially phosphorylated proteins involved in the regulation of MAP-mediated signaling in  $\beta$ -arrestin2-deficient GH1 cells after TRH treatment. Elevated phosphorylation in green, decreased phosphorylation in red.

**Table S10.** A list of differentially phosphorylated proteins involved in MAP kinase-mediated signaling in GH1 cells after siRNA-mediated  $\beta$ -arrestin2 knockdown and stimulation with 1  $\mu$ M TAL

| Uniprot ID | Gene ID   | Gene name                                                         | Phosphorylated regions                                                                                                                                                                                                   |
|------------|-----------|-------------------------------------------------------------------|--------------------------------------------------------------------------------------------------------------------------------------------------------------------------------------------------------------------------|
| F1M0N1     | Abl2      | ABL proto-oncogene 2, non receptor tyrosine kinase                | Ser629 $\uparrow$ [AR] ( $\_1$ )                                                                                                                                                                                         |
| G3V6M0     | Akap6     | A-kinase anchoring protein 6                                      | Ser423 $\downarrow$ [AR] ( $\_1$ ), Ser2208 $\downarrow$ [AR] ( $\_2$ )                                                                                                                                                  |
| F1LPB4     | Akap9     | A-kinase anchoring protein 9                                      | Ser1500 $\uparrow$ [TAL] ( $\_1$ ), Ser1501 $\downarrow$ [AR] ( $\_1$ )                                                                                                                                                  |
| F1LR81     | Akap11    | A-kinase anchoring protein 11                                     | Ser434 $\uparrow$ [TAL] ( $\_3$ ), Ser439 $\uparrow$ [TAL] ( $\_3$ ), Ser440 $\uparrow$ [TAL] ( $\_3$ )                                                                                                                  |
| F1M3G7     | Akap13    | A-kinase anchoring protein 13                                     | Ser2676 $\uparrow$ [TAL] ( $\_2$ )                                                                                                                                                                                       |
| P47196     | Akt1      | AKT serine/threonine kinase 1                                     | Ser122 $\downarrow$ [AR] ( $\_3$ ), Ser126 $\downarrow$ [AR] ( $\_2$ ) $\downarrow$ [AR] ( $\_1$ )                                                                                                                       |
| Q63484     | Akt3      | AKT serine/threonine kinase 3                                     | Ser2 $\downarrow$ [AR] ( $\_2$ ), Thr5 $\downarrow$ [AR] ( $\_2$ )                                                                                                                                                       |
| B2DD29     | Brsk1     | BR serine/threonine kinase 1                                      | Ser490 $\downarrow$ [AR] ( $\_1$ )                                                                                                                                                                                       |
| D3ZML2     | Brsk2     | BR serine/threonine kinase 2                                      | Ser424 $\downarrow$ [-3.60] ( $\_2$ ), Ser428 $\uparrow$ [TAL] ( $\_3$ ) $\downarrow$ [-3.60] ( $\_2$ ), Ser436 $\uparrow$ [TAL] ( $\_3$ ), Ser490 $\downarrow$ [AR] ( $\_1$ )                                           |
| F1LNI8     | Camk2b    | calcium/calmodulin-dependent protein kinase II beta               | Ser358 $\uparrow$ [TAL] ( $\_2$ )                                                                                                                                                                                        |
| A0A0G2K5C0 | Camsap3   | calmodulin regulated spectrin-associated protein family, member 3 | Ser320 $\uparrow$ [TAL] ( $\_1$ )                                                                                                                                                                                        |
| D3ZYD7     | Ccdc88a   | coiled coil domain containing 88A                                 | Ser1319 $\uparrow$ [TAL] ( $\_1$ ), Ser1343 $\downarrow$ [AR] ( $\_1$ )                                                                                                                                                  |
| A0A0G2K5Z1 | Cdc42bpa  | CDC42 binding protein kinase alpha                                | Ser1622 $\downarrow$ [AR] ( $\_2$ ), Ser1625 $\downarrow$ [AR] ( $\_2$ )                                                                                                                                                 |
| A0A140UHY2 | Cdk16     | cyclin-dependent kinase 16                                        | Ser43 $\uparrow$ [TAL] ( $\_2$ ), Ser60 $\uparrow$ [TAL] ( $\_2$ )                                                                                                                                                       |
| D3ZKK3     | Cnst      | consortin, connexin sorting protein                               | Ser117 $\uparrow$ [TAL] ( $\_1$ ), Ser119 $\downarrow$ [AR] ( $\_1$ )                                                                                                                                                    |
| A0A096MJD3 | Csnk2b    | casein kinase 2 beta                                              | Ser154 $\downarrow$ [AR] ( $\_1$ )                                                                                                                                                                                       |
| A0A0G2JTF2 | Dab2ip    | DAB2 interacting protein                                          | Ser719 $\downarrow$ [AR] ( $\_1$ )                                                                                                                                                                                       |
| Q6MGC8     | Daxx      | death-domain associated protein                                   | Ser521 $\uparrow$ [TAL] ( $\_2$ ), Ser526 $\uparrow$ [TAL] ( $\_2$ ), Ser550 $\uparrow$ [TAL] ( $\_3$ ), Ser553 $\uparrow$ [TAL] ( $\_3$ ), Ser556 $\uparrow$ [TAL] ( $\_3$ )                                            |
| A0A0G2KB92 | Dclk1     | doublecortin-like kinase 1                                        | Thr336 $\downarrow$ [AR] ( $\_2$ ), Ser340 $\uparrow$ [TAL] ( $\_1$ )                                                                                                                                                    |
| G3V6K6     | Egfr      | epidermal growth factor receptor                                  | Ser1165 $\downarrow$ [AR] ( $\_1$ )                                                                                                                                                                                      |
| F1LMD9     | Gak       | cyclin G associated kinase                                        | Ser824 $\uparrow$ [TAL] ( $\_2$ ), Ser827 $\uparrow$ [TAL] ( $\_2$ )                                                                                                                                                     |
| D3ZUP4     | Gpatch2l  | G patch domain containing 2-like                                  | Ser86 $\uparrow$ [TAL] ( $\_2$ ), Ser88 $\uparrow$ [TAL] ( $\_2$ )                                                                                                                                                       |
| P51639     | Hmgcr     | 3-hydroxy-3-merhylglutaryl-CoA reductase                          | Ser356 $\downarrow$ [AR] ( $\_2$ )                                                                                                                                                                                       |
| A0A0G2K2T6 | Ilf3      | interleukin enhancer binding factor 3                             | Thr67 $\downarrow$ [AR] ( $\_1$ ), Ser482 $\uparrow$ [TAL] ( $\_1$ )                                                                                                                                                     |
| Q9EQG6     | Kidins220 | kinase D-interacting substrate 220                                | Ser1351 $\uparrow$ [TAL] ( $\_2$ ), Ser1353 $\uparrow$ [TAL] ( $\_2$ ), Ser1513 $\uparrow$ [TAL] ( $\_2$ ), Ser1518 $\uparrow$ [TAL] ( $\_2$ ), Thr1520 $\downarrow$ [AR] ( $\_2$ ), Ser1673 $\downarrow$ [AR] ( $\_1$ ) |

|            |              |                                                                                 |                                                                                                    |
|------------|--------------|---------------------------------------------------------------------------------|----------------------------------------------------------------------------------------------------|
| M0RBD3     | Ksr2         | kinase suppressor of ras 2                                                      | Thr272 ↓[AR] ( _2)                                                                                 |
| F1M2K4     | Lats1        | large tumor suppressor kinase 1                                                 | Ser1111 ↑[TAL] ( _1)                                                                               |
| D3ZBH5     | Lmtk2        | lemur tyrosine kinase 2                                                         | Ser746 ↑[TAL] ( _1), Ser756 ↓[AR] ( _2), Ser1035 ↓[AR] ( _1)                                       |
| F1M0A6     | LOC100909750 | tyrosine-protein kinase ABL1-like mastermind-like transcriptional coactivator 1 | Ser801 ↑[TAL] ( _2)                                                                                |
| D4A930     | Maml1        | mitogen-activated protein kinase kinase kinase 1                                | Ser88 ↓[AR] ( _1)                                                                                  |
| Q62925     | Map3k1       | mitogen activated protein kinase kinase kinase 2                                | Ser513 ↑[TAL] ( _1)                                                                                |
| F1M9D0     | Map3k2       | mitogen activated protein kinase kinase kinase 4                                | Ser135 ↑[TAL] ( _1)                                                                                |
| A0A0G2K3R1 | Map3k4       | mitogen-activated protein kinase kinase kinase 5                                | Ser59 ↓[AR] ( _3), Ser77 ↓[AR] ( _3)                                                               |
| D3ZW27     | Map3k5       | mitogen-activated protein kinase kinase kinase 7                                | Ser1027 ↓[AR] ( _2), Ser1031 ↓[AR] ( _2)                                                           |
| P0C8E4     | Map3k7       | mitogen activated protein kinase kinase kinase 1                                | Ser454 ↑[TAL] ( _2)                                                                                |
| D3Z8I4     | Map4k1       | mitogen-activated protein kinase kinase kinase 4                                | Ser373 ↑[TAL] ( _2), Ser375 ↑[TAL] ( _2)                                                           |
| F1M754     | Map4k4       | mitogen-activated protein kinase 8 interacting protein 2                        | Ser852 ↑[TAL] ( _1)                                                                                |
| G3V9M2     | Mapk8ip2     | microtubule affinity regulating kinase 2                                        | Ser259 ↑[TAL] ( _2)                                                                                |
| A0A0G2K6X6 | Mark2        | microtubule associated serine/threonine kinase-like                             | Ser392 ↑[TAL] ( _1), Ser567 ↑[TAL] ( _1)                                                           |
| D4A355     | Mastl        | misshapen-like kinase 1                                                         | Ser588 ↑[TAL] ( _1)                                                                                |
| A0A0G2K382 | Mink1        | NDRG family member 2                                                            | Ser553 ↑[TAL] ( _2), Ser559 ↑[TAL] ( _2)                                                           |
| A0A0G2JSU4 | Ndrp2        | NIMA-related kinase 1                                                           | Ser336 ↑[TAL] ( _3)                                                                                |
| A0A0G2K5C7 | Nek1         | p21 (RAC1) activated kinase 1                                                   | Ser647 ↓[AR] ( _1)                                                                                 |
| P35465     | Pak1         | protein kinase N1                                                               | Thr228 ↑[TAL] ( _1), Thr229 ↓[AR] ( _2)                                                            |
| Q63433     | Pkn1         | protein kinase N2                                                               | Ser536 ↓[AR] ( _2), Ser920 ↑[TAL] ( _1)                                                            |
| A0A0G2K6J2 | Pkn2         | protein phosphatase 6, regulatory subunit 1                                     | Ser467 ↑[TAL] ( _1)                                                                                |
| D3ZG37     | Ppp6r1       | protein kinase AMP-activated catalytic subunit alpha 1                          | Ser529 ↑[TAL] ( _2), Ser530 ↑[TAL] ( _2)                                                           |
| P54645     | Prkaa1       | protein kinase C, beta                                                          | Thr488 ↓[AR] ( _2), Thr526 ↑[TAL] ( _2), Ser527 ↑[TAL] ( _3)                                       |
| A0A0G2K5Q0 | Prkcb        | protein kinase C, epsilon                                                       | Ser643 ↑[TAL] ( _2)                                                                                |
| F1LMV8     | Prkce        | protein kinase D1                                                               | Ser140 ↑[TAL] ( _2), Ser148 ↑[TAL] ( _2)                                                           |
| A0A0G2K928 | Prkd1        | pre-mRNA processing factor 4B                                                   | Ser361 ↑[TAL] ( _2), Thr364 ↑[TAL] ( _2)                                                           |
| Q5RKH1     | Prpf4b       | presenilin 1                                                                    | Ser21 ↑[TAL] ( _3), Ser24 ↑[TAL] ( _3), Ser33 ↑[TAL] ( _3)                                         |
| P97887     | Psen1        | protein tyrosine kinase 2 beta                                                  | Ser368 ↑[TAL] ( _3), Thr371 ↑[TAL] ( _3), Ser372 ↑[TAL] ( _3)                                      |
| P70600     | Ptk2b        | RAN binding protein 9                                                           | Ser389 ↓[AR] ( _3), Ser392 ↓[AR] ( _3), Ser394 ↓[AR] ( _3), Ser396 ↓[AR] ( _3), Ser399 ↓[AR] ( _3) |
| F1LVV3     | Ranbp9       | RIO kinase 2                                                                    | Ser459 ↓[AR] ( _1)                                                                                 |
| Q5I0I1     | Riok2        | Rho-associated coiled-coil containing protein kinase 2                          | Ser437 ↑[TAL] ( _1)                                                                                |
| F1LQT3     | Rock2        | regulatory associated protein of MTOR, complex 1                                | Ser1124 ↓[AR] ( _1)                                                                                |
| D3ZDU2     | Rptor        |                                                                                 | Thr857 ↓[AR] ( _2), Ser859 ↑[TAL] ( _2)                                                            |



|            |          |                                                  |                                                                              |
|------------|----------|--------------------------------------------------|------------------------------------------------------------------------------|
| F1LU97     | Sash1    | SAM and SH3 domain containing 1                  | Ser534 ↓[AR] (2), Ser541 ↑[TAL] (2)                                          |
| G3V7X2     | Scg2     | secretogranin II                                 | Ser494 ↑[TAL] (1), Ser495 ↑[TAL] (1)                                         |
| Q9JJ19     | Slc9a3r1 | SLC9A3 regulator 1                               | Ser277 ↑[TAL] (1), Ser287 ↓[AR] (1)                                          |
| G3V7I8     | Slk      | STE20-like kinase                                | Ser647 ↑[TAL] (2)                                                            |
| O08623     | Sqstm1   | sequestosome 1                                   | Thr266 ↑[TAL] (2)                                                            |
| Q9WUD9     | Src      | SRC proto-oncogene, non-receptor tyrosine kinase | Ser75 ↓[AR] (1)                                                              |
| E9PTN4     | Srpk1    | SRSF protein kinase 1                            | Ser51 ↓[AR] (2), Ser311 ↑[TAL] (1)                                           |
| A0A0G2JX62 | Srpk2    | SRSF protein kinase 2                            | Ser310 ↓[AR] (1)                                                             |
| F1LRI6     | Taok3    | TAO kinase 3                                     | Ser324 ↓[AR] (1)                                                             |
| D3ZWV8     | Tiam1    | T-cell lymphoma invasion and metastasis 1        | Ser725 ↓[AR] (1), Ser1462 ↓[AR] (2)                                          |
| O08629     | Trim28   | tripartite motif-containing 28                   | Ser27 ↑[6.73] (2), Ser31 ↓[AR] (1), Ser595 ↑[54.59] (3), Ser597 ↑[53.85] (3) |
| Q9Z136     | Tsc1     | tuberous sclerosis 1                             | Ser561 ↓[AR] (2), Ser565 ↓[AR] (2), Ser1097 ↑[TAL] (1)                       |
| D3ZN60     | Ttbk2    | tau tubulin kinase 2                             | Ser755 ↓[AR] (2)                                                             |
| Q66HC2     | Vrk3     | vaccinia related kinase 3                        | Ser82 ↓[-12.85] (3), Ser83 ↓[-12.85] (3), Ser85 ↓[-12.85] (3)                |
| Q63802     | Wee1     | WEE1 G2 checkpoint kinase                        | Ser85 ↓[AR] (2)                                                              |
| A0A0G2K3A0 | Wnk1     | WNK lysine deficient protein kinase 1            | Ser1809 ↓[AR] (2)                                                            |
| D3ZMJ7     | Wnk2     | WNK lysine deficient protein kinase 2            | Ser1830 ↓[AR] (2), Ser1831 ↓[AR] (2)                                         |
| A0A1W2Q6C5 | Wnk3     | WNK lysine deficient protein kinase 3            | Ser436 ↓[AR] (3), Thr449 ↓[AR] (3)                                           |

↑, elevated phosphorylation; ↓, decreased phosphorylation; ↓[AR], detected only in  $\beta$ -arrestin2-deficient cells; ↑[TAL], detected only in  $\beta$ -arrestin2-deficient cells stimulated with TAL; (1, 2, 3), multiplicity

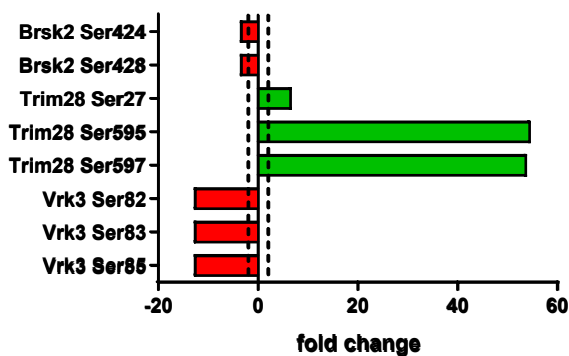

**Figure S20.** Quantitative changes in phosphoproteins involved in the regulation of MAP-mediated signaling in GH1 cells after siRNA-mediated  $\beta$ -arrestin2 knockdown and stimulation with 1  $\mu$ M TAL.

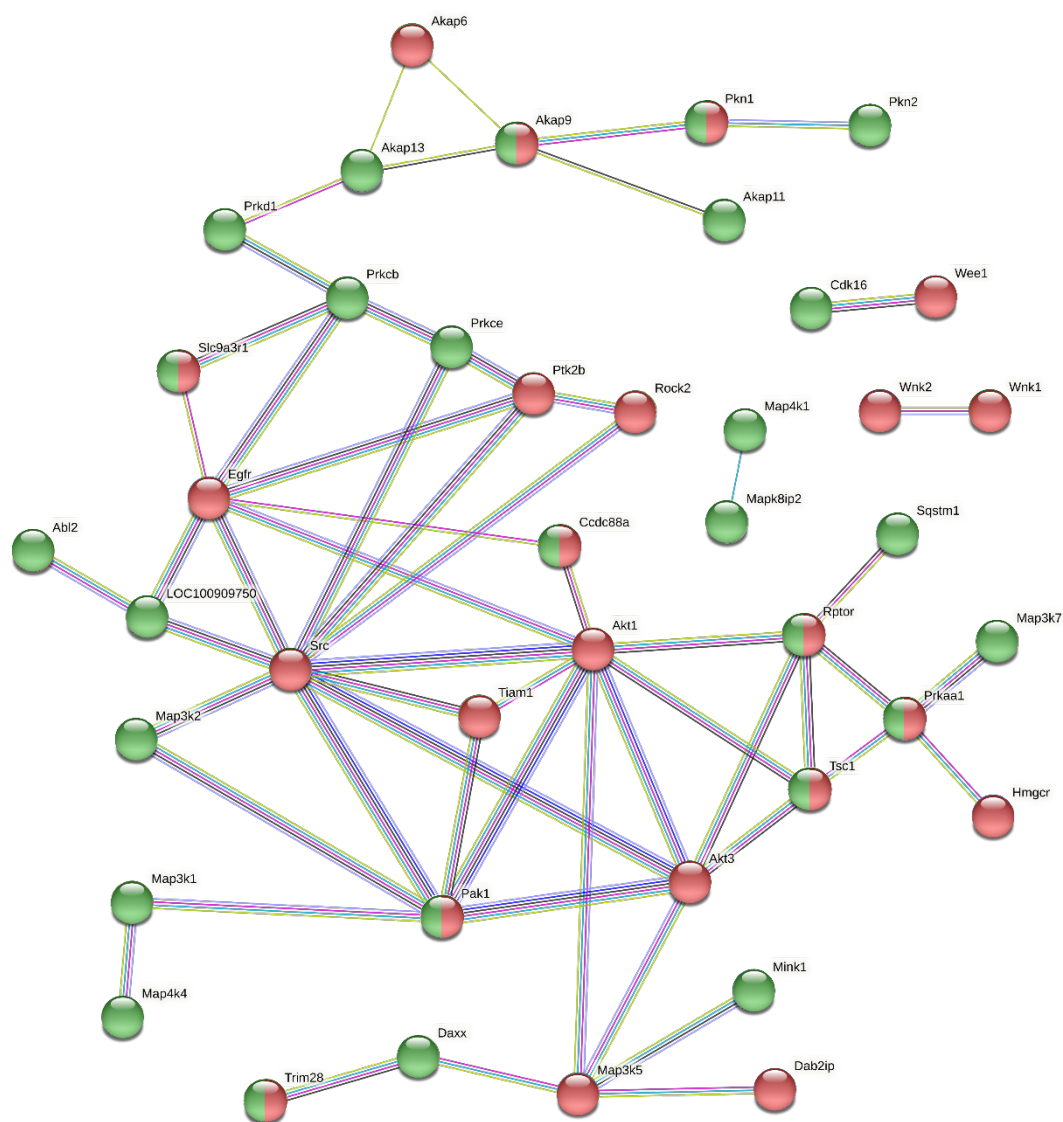

**Figure S21.** A network of differentially phosphorylated proteins involved in the regulation of MAP-mediated signaling in  $\beta$ -arrestin2-deficient GH1 cells after TAL treatment. Elevated phosphorylation in green, decreased phosphorylation in red.
